# Supplementary material for: Unveiling the complex pattern of intermolecular interactions responsible for the stability of the DNA duplex
Source: Chem Sci. 2021 Sep 2;12(38):12785–93. doi: 10.1039/d1sc03868k (PMC8494058; doi:10.1039/d1sc03868k)
Supplement: SC-012-D1SC03868K-s001 [file SC-012-D1SC03868K-s001.xlsx]

## Sheet: TITLE
					Electronic Supplementary Material for
Unveiling the complex pattern of intermolecular interactions responsible for the stability of the DNA duplex
Ahmet Altun, Miquel Garcia-Ratés, Frank Neese, Giovanni Bistoni
Max-Planck-Institut für Kohlenforschung, Kaiser-Wilhelm-Platz 1, D-45470 Mülheim an der Ruhr, Germany
Table of Contents
Sheet Name	Description
Dimers-XYZ	Optimized Cartesian Coordinates (Å) of Nucleobase Dimers in Gas Phase at the RI-MP2/cc-PVTZ Level
CT...GA-XYZ	Optimized Cartesian Coordinates (Å) of the CTˑˑˑGA Base Step in Water
DNA-XYZ	Optimized Cartesian Coordinates (Å) of DNA for Subsystem SS and Large System LS
Solvation Schemes	The Dependence of Interaction Energies on the Implicit Solvation Schemes and Geometries
	A. The Dependence of B3LYP-D3(BJ)/def2-TZVP(-f) Inter-strand Interaction Energy (kcal/mol) on CPCM and SMD Methods for the SSN(BACK-C) Model in Water
	B. The Dependence of the London Dispersion component of HFLD/ def2-TZVP(-f) Inter-strand Interaction Energy (kcal/mol) on the Solvation Schemes for the CT×××GA Base Step in Water
	C. Geometry Dependence of the HFLD Inter-strand Interaction Energy (kcal/mol) for the CT×××GA Base Step in Water
	D. References
LED-DNA-SS-noBackbone	HFLD/LED Interaction Energy (kcal/mol) Matrices of DNA for the Subsystem SS without Backbones
LED-DNA-SS-withBackbone	HFLD/LED Dispersion Energy (kcal/mol) Matrices of DNA for the Subsystem SS with Backbones
LED-DNA-LS-GasPhase	HFLD/LED Interaction Energy (kcal/mol) Matrices of the Large DNA System LS without Backbones in Gas Phase
LED-DNA-LS-inWater	HFLD/LED Interaction Energy (kcal/mol) Matrices of the Large DNA System LS without Backbones in Water
HeatMaps-DNA-LS	The HFLD/LED Interaction Energy Map for the Large DNA System LS without Backbones
	Electrostatic, Exchange, Solvent polarization, and Dispersion Energy Submatrices of the HFLD/LED Interaction Energy Map for the Large DNA System LS without Backbones
BaseStepContributions	Average Base Step Contributions (kcal/mol) Obtained on the Large DNA System LS Without Backbones in Water
References	Generic References for the Methods Used

## Sheet: Dimers-XYZ
OPTIMIZED CARTESIAN COORDINATES (Å) OF NUCLEOBASE DIMERS IN GAS PHASE AT THE RI-MP2/cc-pVTZ LEVEL
Watson-Crick Base Pairs																		Stacked Structures																		Monomers: These structures are not needed for interaction energy calculations. They are provided for completeness.
AU						AT						GC						AU						AT						GC						A					U					T
		X	Y	Z				X	Y	Z				X	Y	Z				X	Y	Z				X	Y	Z				X	Y	Z			X	Y	Z			X	Y	Z			X	Y	Z
A	N	16.8883	13.8234	0.329314		A	N	-0.0641108	0.035588	0.0450543		G	N	-0.0668972	0.0689313	-0.0290089		A	N	-2.63042	-1.89677	0.920466		A	N	-2.63276	-1.92201	0.945041		G	O	1.67275	1.83404	-2.02903		N	16.9112	13.8515	0.338006		N	21.9306	13.5653	-6.95027		N	21.8879	13.5254	-6.99008
	H	15.895	13.9849	0.348993			H	0.942131	0.0447568	0.0620007			H	0.939166	0.0745485	-0.0295917			C	-1.56038	-1.74895	0.101588			C	-1.56366	-1.74818	0.128165			C	0.626951	1.39777	-1.57092		H	15.9188	14.0168	0.358778		H	21.5795	13.6939	-7.88434		H	21.5306	13.6464	-7.92289
	C	18.9563	13.5219	-0.312391			C	-2.17054	0.61861	-0.0011037			C	-0.8648	1.17929	-0.00175935			N	-1.72556	-1.82819	-1.22392			N	-1.72958	-1.80795	-1.19806			N	-0.144852	2.16789	-0.677843		C	18.9774	13.5358	-0.305571		C	23.2653	13.3645	-6.71436		C	23.228	13.3179	-6.7666
	N	18.9806	13.4389	1.06019			N	-2.16917	-0.756466	0.0231236			N	-1.21084	4.638	0.136417			C	-0.651036	-1.66457	-2.01623			C	-0.654882	-1.63015	-1.98899			C	-1.25883	1.76917	0.00124869		N	19.0042	13.466	1.06865		H	23.896	13.3552	-7.59077		H	23.8467	13.2962	-7.65241
	C	17.7164	13.6262	1.40005			C	-0.882354	-1.06044	0.0504442			H	-1.94537	5.31134	-0.0725792			N	0.617132	-1.41866	-1.67271			N	0.61368	-1.39481	-1.64147			N	-1.85871	0.621495	-0.196529		C	17.7412	13.6616	1.40827		C	20.973	13.6078	-5.95024		C	20.9413	13.585	-5.98701
	H	17.3459	13.6286	2.41144			H	-0.486917	-2.06205	0.0748199			H	-0.258203	4.90847	-0.0278889			C	0.748688	-1.37605	-0.342829			C	0.745314	-1.36933	-0.311083			C	-1.20125	-0.135357	-1.10896		H	17.3708	13.6756	2.41966		O	19.7918	13.7872	-6.1705		O	19.757	13.769	-6.19144
	N	19.6286	13.5411	-2.56483			N	-2.89375	2.85469	-0.0523545			N	-0.436451	2.45978	0.0253203			C	-0.264923	-1.53865	0.608501			C	-0.270087	-1.5392	0.637597			C	-0.013268	0.128486	-1.78449		N	19.6612	13.528	-2.5652		N	21.5086	13.4266	-4.69185		N	21.4915	13.4126	-4.7319
	C	18.3387	13.7717	-2.89037			C	-1.59356	3.21829	-0.0366842			C	-1.44414	3.30713	0.0498744			N	0.215451	-1.43064	1.89113			N	0.209382	-1.44664	1.92176			N	0.376794	-0.943107	-2.55109		C	18.3718	13.7594	-2.88085		H	20.8428	13.4509	-3.93156		H	20.8358	13.4483	-3.96336
	H	18.1504	13.865	-3.9524			H	-1.4235	4.28736	-0.0525993			N	-2.75957	2.92648	0.0364269			C	1.50747	-1.20018	1.71556			C	1.5026	-1.21869	1.74864			C	-0.575065	-1.83989	-2.35232		H	18.167	13.8434	-3.93991		C	22.8482	13.2146	-4.33158		C	22.8304	13.1965	-4.39156
	N	17.2952	13.8956	-2.07632			N	-0.521229	2.43305	-0.00475597			H	-3.48377	3.66343	0.018662			N	1.88248	-1.16292	0.402142			N	1.87983	-1.17413	0.436945			N	-1.54887	-1.40023	-1.49628		N	17.322	13.897	-2.07035		O	23.1595	13.0714	-3.16235		O	23.1631	13.0614	-3.22449
	C	17.6704	13.7603	-0.797123			C	-0.877451	1.14135	0.0117797			C	-3.24131	1.61606	0.0112843			H	-0.8468	-1.73722	-3.07861			H	-0.85142	-1.68459	-3.05231			N	-1.75858	2.68157	0.9082		C	17.6912	13.7745	-0.790738		C	23.7521	13.1909	-5.46949		C	23.7425	13.1519	-5.52932
	C	19.979	13.4095	-1.27458			C	-3.22446	1.55272	-0.0353216			O	-4.458	1.39407	0.00688244			H	2.22178	-1.04828	2.50741			H	2.21573	-1.07615	2.54328			H	0.267469	3.05874	-0.433581		C	19.9884	13.4122	-1.27478		H	24.8018	13.0337	-5.29232		C	25.1921	12.9248	-5.25584
	N	21.258	13.1819	-0.950553			N	-4.51402	1.19255	-0.0518205			C	-2.16488	0.676709	-0.00751843			H	2.80242	-0.952618	0.0503508			H	2.79416	-0.935494	0.0883981			H	-0.614224	-2.81472	-2.80821		N	21.2734	13.1818	-0.934152							H	25.5841	13.7054	-4.60586
	H	21.9656	13.1052	-1.67756			H	-5.24463	1.90038	-0.0728058			N	-2.17598	-0.699297	-0.0366345			H	-3.5268	-1.79465	0.473918			H	-3.53168	-1.84176	0.499357			H	-2.37438	-1.89548	-1.20207		H	21.9621	13.0949	-1.65734							H	25.7653	12.9134	-6.18044
	H	21.4938	13.0876	0.0202024			H	-4.73583	0.214107	-0.0355534			C	-0.898229	-1.02357	-0.0483192			H	-2.54067	-1.47876	1.83341			H	-2.55393	-1.51349	1.86313			H	-2.52851	2.25969	1.40812		H	21.5245	13.0885	0.0315989							H	25.3385	11.9789	-4.73687
U	N	21.9406	13.5572	-6.93211		T	N	-5.29527	7.16463	-0.199754			H	-0.512926	-2.02881	-0.0710391		U	N	0.0909655	1.6493	1.27937		T	N	0.0884292	1.6071	1.22793			H	-1.03907	2.95119	1.57172
	H	21.5911	13.6842	-7.86726			H	-4.96233	8.11422	-0.212643		C	N	-5.48835	7.17691	-0.273698			C	1.19644	1.79962	0.47143			C	1.19572	1.75787	0.422577		C	C	0.719619	0.442417	1.98846
	C	23.2701	13.3534	-6.69088			C	-6.63645	6.88339	-0.227277			H	-5.1804	8.13144	-0.369132			N	0.883503	1.79439	-0.873251			N	0.875799	1.79918	-0.915345			N	0.138118	-0.806385	2.26064
	H	23.9087	13.3379	-7.56169			H	-7.29358	7.74095	-0.262966			C	-6.80438	6.86334	-0.188347			C	-0.377455	1.56831	-1.35969			C	-0.399188	1.64601	-1.40167			C	0.441032	-1.93378	1.57582
	C	20.9808	13.6065	-5.92993			C	-4.31026	6.19355	-0.153184			H	-7.50382	7.68507	-0.227334			C	-1.42784	1.36686	-0.536326			C	-1.46783	1.4585	-0.593973			C	1.36997	-1.89145	0.588409
	O	19.8009	13.7907	-6.16916			O	-3.12163	6.46309	-0.129247			C	-7.18619	5.57079	-0.0629816			C	-1.23016	1.3707	0.898964			C	-1.24015	1.39878	0.841765			C	1.97992	-0.619651	0.34336
	N	21.4948	13.4294	-4.66718			N	-4.81012	4.91167	-0.13686			H	-8.22716	5.3011	0.00387081			O	2.33579	1.91966	0.889551			O	2.33918	1.83697	0.843782			N	1.68217	0.474883	1.02141
	H	20.7961	13.4637	-3.88787			H	-4.09353	4.14882	-0.102019			C	-4.47425	6.21501	-0.235486			O	-2.08345	1.15335	1.74584			O	-2.10367	1.18951	1.6833			O	0.32442	1.42588	2.61163
	C	22.8191	13.2175	-4.32125			C	-6.13751	4.53297	-0.162206			O	-3.30332	6.58707	-0.322245			H	-2.41433	1.17752	-0.922857			C	-2.86327	1.31106	-1.10015			N	2.92725	-0.51962	-0.622171
	O	23.1495	13.0735	-3.14356			O	-6.45933	3.34128	-0.144056			N	-4.85403	4.9166	-0.104075			H	1.66778	1.87625	-1.49894			H	1.65806	1.86935	-1.54501			H	-0.577661	-0.802399	2.97009
	C	23.7428	13.1834	-5.43831			C	-7.1083	5.61659	-0.210895			C	-6.14249	4.5856	-0.0277422			H	0.281408	1.59474	2.27108			H	0.275439	1.52176	2.21812			H	-0.0851755	-2.8339	1.85851
	H	24.7895	13.0228	-5.24687			C	-8.55968	5.27077	-0.239877			N	-6.44448	3.29372	0.0874116			H	-0.468915	1.55481	-2.43492			H	-0.492838	1.68623	-2.47726			H	1.64094	-2.7736	0.0322519
							H	-8.78807	4.65321	-1.10713			H	-5.69816	2.57887	0.0661507									H	-3.25512	0.325123	-0.857652			H	2.86104	-1.19149	-1.37026
							H	-9.17239	6.16926	-0.275102			H	-7.40658	3.01316	0.126031									H	-2.8955	1.43456	-2.1808			H	3.08159	0.42738	-0.944258
							H	-8.83214	4.69169	0.641082															H	-3.51477	2.05101	-0.637199

## Sheet: CT...GA-XYZ
OPTIMIZED CARTESIAN COORDINATES (Å) OF THE CTˑˑˑGA BASE STEP IN WATER
CHARGED SYSTEM														CHARGED SYSTEM AFTER CUTTING OUT BACKBONES						NEUTRAL SYSTEM
														After the bonds cut were protonated, no geometry opt.
		B3LYP-D3(BJ)/def2-SVP				RI-MP2/def2-SVP				GFN2-xTB						GFN2-xTB						B3LYP-D3(BJ)/def2-SVP				RI-MP2/def2-SVP				GFN2-xTB
		X	Y	Z		X	Y	Z		X	Y	Z				X	Y	Z				X	Y	Z		X	Y	Z		X	Y	Z
StrandX	H	7.10764	20.7447	-19.0174		8.05639	20.0859	-18.6341		6.80775	18.8322	-19.4228		StrandX	H	4.3383	19.0551	-16.1269		StrandX	H	8.32381	19.8579	-18.0115		8.05122	20.1959	-18.5961		7.54743	17.8112	-18.6881
	O	7.3304	20.0139	-18.4238		7.13902	20.097	-18.3291		6.8672	18.1034	-18.7954			N	4.80761	19.2303	-15.2139			O	7.3792	19.8563	-17.8016		7.12821	20.1486	-18.3118		6.69269	18.1767	-18.4233
	C	6.58869	18.8691	-18.8117		6.50867	18.9449	-18.8541		5.78233	17.2325	-18.9833			C	6.15126	19.2539	-14.9375			C	6.82412	18.6283	-18.2348		6.59524	18.9355	-18.8035		5.68545	17.2527	-18.7675
	H	6.57493	18.7492	-19.9108		6.50425	18.9506	-19.9591		5.629	17.0106	-20.0458			H	6.88393	18.9921	-15.6742			H	6.95445	18.482	-19.3241		6.61748	18.8975	-19.9074		5.68714	17.0579	-19.8471
	H	7.11275	17.9962	-18.3908		7.01768	18.0223	-18.5221		6.04012	16.3146	-18.4514			N	6.41978	19.5885	-13.7151			H	7.29803	17.7702	-17.724		7.15311	18.0632	-18.4205		5.81959	16.3092	-18.2252
	C	5.15411	18.8241	-18.2901		5.07393	18.8705	-18.3783		4.45103	17.739	-18.3951			C	5.19688	19.8106	-13.1257			C	5.33772	18.5818	-17.917		5.15652	18.7863	-18.3578		4.30842	17.8112	-18.3829
	H	4.65563	17.9564	-18.7531		4.59854	18.0037	-18.8657		3.64343	17.0686	-18.7194			C	4.83959	20.2476	-11.8213			H	4.93355	17.6516	-18.3453		4.74608	17.8759	-18.823		3.53261	17.1772	-18.8275
	O	5.15607	18.6504	-16.8621		5.03549	18.679	-16.9532		4.51706	17.7166	-16.9708			O	5.59324	20.5526	-10.8943			O	5.12178	18.5679	-16.4978		5.08294	18.6506	-16.9297		4.12912	17.7943	-16.9712
	C	4.5218	19.7599	-16.2338		4.38975	19.7852	-16.3392		4.16516	18.9904	-16.4638			N	3.46315	20.3205	-11.6534			C	4.47573	19.7599	-16.0712		4.38232	19.7491	-16.3677		4.01226	19.1106	-16.4691
	H	3.48434	19.5182	-15.9672		3.34888	19.545	-16.0822		3.08427	19.0333	-16.2684			H	3.13148	20.671	-10.7313			H	3.42698	19.5537	-15.8219		3.35523	19.4615	-16.0978		2.96367	19.3103	-16.2063
	N	5.17333	20.0645	-14.9863		5.03228	20.0883	-15.0875		4.80761	19.2303	-15.2139			C	2.53644	20.0613	-12.6279			N	5.06374	20.2289	-14.8434		5.00336	20.1383	-15.1304		4.72992	19.2602	-15.2397
	C	6.48448	20.4485	-14.7542		6.33535	20.4622	-14.8662		6.15126	19.2539	-14.9375			N	1.24826	20.1585	-12.2932			C	6.38943	20.5406	-14.5788		6.29578	20.5606	-14.9243		6.07628	19.1721	-14.9905
	H	7.2071	20.484	-15.5708		7.0522	20.4981	-15.6874		6.88393	18.9921	-15.6742			H	0.97869	20.4815	-11.3628			H	7.14613	20.4344	-15.3581		7.00633	20.6052	-15.7504		6.77686	18.8909	-15.7508
	N	6.71169	20.7281	-13.4919		6.58599	20.7177	-13.5886		6.41978	19.5885	-13.7151			H	0.571411	20.1791	-13.0394			N	6.57546	20.9203	-13.3365		6.54459	20.8431	-13.653		6.39171	19.4424	-13.7629
	C	5.49355	20.5303	-12.8552		5.37806	20.5129	-12.9617		5.19688	19.8106	-13.1257			N	2.85906	19.6835	-13.8499			C	5.32016	20.8653	-12.7491		5.3491	20.6066	-13.0139		5.20001	19.7301	-13.1373
	C	5.09001	20.6939	-11.4925		5.02165	20.5928	-11.5759		4.83959	20.2476	-11.8213			C	4.18124	19.5829	-14.0575			C	4.87531	21.1503	-11.4191		5.0018	20.6896	-11.6255		4.8903	20.1578	-11.817
	O	5.79565	21.0245	-10.5279		5.76964	20.848	-10.6219		5.59324	20.5526	-10.8943			H	0.683325	22.8119	-14.5555			O	5.56297	21.4842	-10.4434		5.7491	20.9699	-10.6789		5.67324	20.3943	-10.893
	N	3.72054	20.4475	-11.3212		3.65843	20.3539	-11.3925		3.46315	20.3205	-11.6534			N	1.68023	22.8678	-14.2116			N	3.48708	21.0129	-11.2954		3.64499	20.4236	-11.4308		3.52361	20.3196	-11.6255
	H	3.33491	20.6556	-10.3706		3.30301	20.5137	-10.4223		3.13148	20.671	-10.7313			C	2.84548	22.5078	-14.8309			H	3.08787	21.2755	-10.3605		3.29626	20.5838	-10.4584		3.23086	20.6722	-10.6902
	C	2.83971	20.073	-12.3126		2.75825	20.0019	-12.3765		2.53644	20.0613	-12.6279			H	2.85596	22.1029	-15.8231			C	2.62253	20.624	-12.2933		2.74586	20.0434	-12.4042		2.56651	20.1387	-12.5873
	N	1.54717	19.8932	-11.9695		1.48426	19.7441	-11.9848		1.24826	20.1585	-12.2932			N	3.90933	22.7068	-14.1121			N	1.30854	20.5727	-11.9945		1.47722	19.7801	-12.0021		1.28829	20.2874	-12.2376
	H	1.21207	20.2379	-11.0581		1.18677	20.1206	-11.077		0.97869	20.4815	-11.3628			C	3.44435	23.2122	-12.9212			H	0.962563	21.06	-11.1558		1.17717	20.1727	-11.102		1.03614	20.6171	-11.3052
	H	0.891092	19.9718	-12.7493		0.815306	19.8606	-12.7492		0.571411	20.1791	-13.0394			C	4.07366	23.6699	-11.7433			H	0.691207	20.5516	-12.8076		0.80394	19.8594	-12.7664		0.61499	20.3287	-12.9868
	N	3.22448	19.867	-13.5648		3.09757	19.8477	-13.6446		2.85906	19.6835	-13.8499			N	5.38951	23.71	-11.5587			N	3.04163	20.2905	-13.5089		3.0833	19.8704	-13.6718		2.84821	19.7884	-13.8269
	C	4.52236	20.1239	-13.7784		4.3973	20.1174	-13.8736		4.18124	19.5829	-14.0575			H	5.98845	23.2711	-12.2356			C	4.36353	20.4412	-13.6793		4.37663	20.1617	-13.911		4.15567	19.6047	-14.0551
	C	4.29177	20.0782	-18.5416		4.2154	20.1138	-18.638		4.08593	19.1887	-18.7899			H	5.76523	24.0573	-10.6752			C	4.51035	19.7712	-18.4305		4.24765	19.9701	-18.6886		4.1179	19.2712	-18.8299
	H	4.5792	20.621	-19.4572		4.51405	20.657	-19.5487		4.57238	19.5224	-19.7149			N	3.26723	24.1393	-10.7708			H	4.88883	20.2013	-19.3674		4.51086	20.4822	-19.6242		4.74136	19.52	-19.6901
	C	4.55115	20.8739	-17.2691		4.44577	20.9026	-17.3633		4.55257	19.9706	-17.57			C	1.95105	24.1601	-10.9383			C	4.57331	20.724	-17.2498		4.3847	20.822	-17.4452		4.50787	20.0393	-17.5819
	H	5.5568	21.3112	-17.3186		5.4533	21.3338	-17.3885		5.63438	20.0979	-17.5858			H	1.38056	24.5494	-10.1033			H	5.55761	21.2071	-17.2628		5.36021	21.321	-17.4763		5.59447	20.1117	-17.5401
	H	3.8249	21.6678	-17.0886		3.70768	21.6886	-17.2004		4.05756	20.9315	-17.4932			N	1.26449	23.7842	-11.9951			H	3.80547	21.5004	-17.2449		3.60198	21.5736	-17.3223		4.06516	21.028	-17.5351
	O	2.93811	19.6248	-18.6646		2.87173	19.6424	-18.7605		2.68625	19.244	-18.9785			C	2.04657	23.3068	-12.9711			O	3.17613	19.248	-18.6889		2.92043	19.407	-18.8179		2.75185	19.4424	-19.2231
	P	1.56707	20.472	-18.2837		1.52113	20.5688	-18.4719		1.84295	20.66	-18.8754			H	-0.102231	21.8218	-7.4127			P	1.75538	19.9864	-18.585		1.5147	20.1685	-18.689		1.83526	20.7146	-19.0006
	O	0.449436	19.7745	-19.0153		0.396846	19.8838	-19.2011		0.528417	20.376	-19.5102			N	0.941205	21.8733	-7.65154			O	0.714581	19.2033	-19.2966		0.422083	19.4939	-19.4306		0.630774	20.6279	-19.8315
	O	1.82476	21.9602	-18.3946		1.84842	22.0344	-18.6286		2.68112	21.806	-19.3187			C	1.81446	22.4594	-6.80254			O	1.97939	21.5223	-19.0087		1.88228	21.6803	-19.0777		2.75251	21.981	-19.2284
	O	1.42527	20.1873	-16.6577		1.32252	20.3534	-16.8353		1.63683	20.8281	-17.2426			H	1.39341	22.8772	-5.90082			O	1.46712	20.2581	-17.0255		1.23419	20.3179	-17.0981		1.52213	20.8366	-17.4294
	C	0.507358	19.2673	-16.0902		0.512345	19.3273	-16.294		0.584189	20.1195	-16.633			C	3.13733	22.5041	-7.07595			C	0.647971	19.3822	-16.2217		0.472478	19.3184	-16.3952		0.392183	20.134	-16.9236
	H	0.107135	18.5909	-16.863		0.0937289	18.6951	-17.0927		0.115263	19.4701	-17.3801			H	3.83563	22.9538	-6.39239			H	0.288408	18.5454	-16.8379		0.0116649	18.6259	-17.1147		-0.165555	19.709	-17.7624
	H	1.05241	18.6802	-15.3348		1.12556	18.7092	-15.6183		1.00188	19.5171	-15.8154			C	3.57771	21.9185	-8.30284			H	1.27885	19.006	-15.4041		1.15439	18.768	-15.731		0.746296	19.337	-16.2643
	C	-0.659234	19.9744	-15.4144		-0.629976	19.9326	-15.5024		-0.481011	21.053	-16.0316			N	4.86021	21.8636	-8.61833			C	-0.546011	20.1177	-15.6368		-0.619193	19.9646	-15.5678		-0.527027	21.0593	-16.116
	H	-1.35085	19.1984	-15.0454		-1.30263	19.119	-15.1844		-1.41307	20.4847	-15.9389			H	5.54813	22.2724	-8.00985			H	-1.21249	19.3491	-15.2119		-1.29463	19.1587	-15.2383		-1.46048	20.514	-15.9326
	O	-0.236466	20.7428	-14.2762		-0.165177	20.5921	-14.3145		-0.144382	21.4606	-14.7124			H	5.15895	21.3909	-9.48291			O	-0.178541	20.997	-14.5683		-0.0994268	20.5988	-14.394		0.0213873	21.3636	-14.8426
	C	-0.201524	22.1381	-14.5718		-0.138422	22.0027	-14.4861		0.315542	22.7913	-14.6824			N	2.69606	21.3918	-9.15321			C	-0.20229	22.3656	-14.9718		-0.111224	22.0148	-14.5212		0.38965	22.724	-14.7489
	H	-0.844783	22.648	-13.8411		-0.769922	22.4526	-13.7055		-0.269946	23.3237	-13.9198			C	1.38631	21.3777	-8.89304			H	-0.89742	22.9003	-14.3102		-0.759741	22.4333	-13.7373		-0.236223	23.1998	-13.9805
	C	-1.41925	20.9751	-16.3046		-1.41892	21.015	-16.2454		-0.69205	22.341	-16.8488			O	0.567249	20.91	-9.68426			C	-1.31697	21.0054	-16.6321		-1.41459	21.0662	-16.2773		-0.798521	22.4067	-16.8194
	H	-1.33646	20.6948	-17.368		-1.44108	20.8229	-17.3313		-0.320381	22.2009	-17.8721			H	2.92185	26.1396	-5.52991			H	-1.19981	20.637	-17.6659		-1.47594	20.8895	-17.365		-0.600032	22.317	-17.8958
	C	-0.710661	22.2969	-16.012		-0.661045	22.2868	-15.8961		0.137126	23.38	-16.0907			N	3.62102	26.021	-6.33376			C	-0.662727	22.3742	-16.4371		-0.626099	22.3183	-15.9288		0.188895	23.3522	-16.1344
	H	0.11147	22.4456	-16.7211		0.155923	22.4441	-16.6062		1.10206	23.5129	-16.5761			C	4.95183	26.2558	-6.11437			H	0.181901	22.489	-17.1247		0.199272	22.4521	-16.634		1.13124	23.3755	-16.6772
	H	-1.40781	23.1408	-16.1049		-1.33142	23.1569	-15.9084		-0.396948	24.3263	-16.0642			H	5.17753	26.708	-5.15861			H	-1.37984	23.1811	-16.6361		-1.26645	23.2099	-15.9449		-0.228794	24.353	-16.0647
	O	-2.77837	21.1019	-15.907		-2.721	21.1491	-15.7019		-2.03487	22.7579	-16.8635			C	5.90763	25.9529	-7.01508			O	-2.68542	21.1121	-16.2801		-2.69351	21.2137	-15.6926		-2.09784	22.8837	-16.5956
	N	1.13181	22.6717	-14.345		1.19756	22.5155	-14.2376		1.68023	22.8678	-14.2116			C	7.36374	26.1986	-6.78736			N	1.09955	22.97	-14.739		1.21283	22.5395	-14.2535		1.7411	22.8463	-14.2646
	C	2.228	22.6778	-15.1938		2.27194	22.58	-15.092		2.84548	22.5078	-14.8309			H	7.55257	26.4296	-5.74524			C	2.23843	22.883	-15.5235		2.30084	22.5628	-15.0898		2.9166	22.5223	-14.8822
	H	2.1293	22.4078	-16.2439		2.15805	22.3625	-16.1499		2.85596	22.1029	-15.8231			H	7.92808	25.3184	-7.0864			H	2.18887	22.5035	-16.5384		2.20358	22.288	-16.1348		2.94269	22.1198	-15.874
	N	3.3399	23.0459	-14.5987		3.40274	22.9419	-14.5004		3.90933	22.7068	-14.1121			H	7.69879	27.0263	-7.40923			N	3.3256	23.2915	-14.9157		3.42444	22.9452	-14.5005		3.97264	22.7396	-14.1573
	C	2.97511	23.2934	-13.2871		3.04751	23.1117	-13.1863		3.44435	23.2122	-12.9212			C	5.49642	25.3345	-8.2645			C	2.903	23.6538	-13.6491		3.05012	23.1645	-13.1988		3.4899	23.2188	-12.9631
	C	3.70728	23.679	-12.1381		3.79027	23.485	-12.0396		4.07366	23.6699	-11.7433			O	6.26523	24.9009	-9.11536			C	3.60137	24.077	-12.4911		3.78222	23.5665	-12.0544		4.10051	23.6658	-11.7708
	N	5.03907	23.8598	-12.1272		5.11793	23.7413	-12.0686		5.38951	23.71	-11.5587			N	4.13553	25.2472	-8.45136			N	4.93227	24.2359	-12.4505		5.10704	23.8292	-12.0784		5.41275	23.7163	-11.571
	H	5.5686	23.542	-12.9306		5.63917	23.3366	-12.8403		5.98845	23.2711	-12.2356			H	3.8021	24.8258	-9.36374			H	5.47761	23.8999	-13.2353		5.63509	23.4255	-12.8463		6.02352	23.3384	-12.2725
	H	5.52524	23.9466	-11.2256		5.60031	23.7834	-11.1659		5.76524	24.0573	-10.6752			C	3.15945	25.5585	-7.55165			H	5.40223	24.3759	-11.5455		5.58266	23.8743	-11.1718		5.78617	24.094	-10.6992
	N	3.00128	23.8763	-11.001		3.09946	23.6709	-10.8999		3.26723	24.1393	-10.7708			O	1.97284	25.4242	-7.80302			N	2.863	24.3123	-11.3815		3.08131	23.7634	-10.9223		3.27496	24.0964	-10.7978
	C	1.67616	23.6596	-10.9701		1.77026	23.4329	-10.8563		1.95105	24.1601	-10.9383		StrandX							C	1.53243	24.1293	-11.3988		1.75348	23.5183	-10.8848		1.95947	24.0889	-10.9715
	H	1.19251	23.8601	-10.0072		1.28903	23.6412	-9.89443		1.38056	24.5494	-10.1033									H	1.02437	24.3301	-10.4509		1.26736	23.7279	-9.92556		1.37769	24.4475	-10.1311
	N	0.90829	23.245	-11.9742		0.992822	23.0056	-11.8487		1.26449	23.7842	-11.9951									N	0.788682	23.712	-12.422		0.982992	23.0802	-11.8778		1.289	23.7156	-12.0385
	C	1.60112	23.0753	-13.1096		1.68064	22.8503	-12.9912		2.04657	23.3068	-12.9711									C	1.52007	23.4694	-13.5179		1.68088	22.9104	-13.0114		2.09045	23.2792	-13.0181
	H	-3.22679	20.2696	-16.1164		-3.19504	20.3262	-15.8871		-2.54205	22.176	-17.4424									H	-3.0989	20.2475	-16.42		-3.19252	20.4057	-15.8785		-2.73469	22.3274	-17.058
StrandY	H	6.36718	26.3443	-2.7711		6.22644	26.5912	-2.50829		5.67219	27.7314	-2.42938									H	2.14495	21.6398	-19.9604		1.13457	22.1364	-19.5013		2.34535	22.616	-19.8269
	O	5.48098	26.1329	-3.09667		5.35494	26.3268	-2.83255		4.91885	27.3432	-2.89877								StrandY	H	6.61182	26.4229	-3.26474		6.25469	26.4066	-2.46288		5.60759	27.8899	-2.8621
	C	4.62147	27.2199	-2.79326		4.48409	27.4278	-2.65198		3.78432	28.15	-2.68641									O	5.71789	26.0848	-3.41662		5.37064	26.2063	-2.79932		4.83058	27.3963	-3.14828
	H	4.49882	27.3442	-1.70041		4.25368	27.5889	-1.58343		3.57408	28.2636	-1.61716									C	4.79479	27.1369	-3.19304		4.57248	27.36	-2.61694		3.6972	28.2194	-2.99267
	H	5.02701	28.1664	-3.19603		4.92612	28.3579	-3.04977		3.92145	29.1368	-3.14571									H	4.78749	27.4402	-2.12954		4.35164	27.535	-1.54896		3.55746	28.4931	-1.94065
	C	3.24685	27.0123	-3.41106		3.18321	27.189	-3.38619		2.55602	27.512	-3.34422									H	5.04133	28.0282	-3.79813		5.06639	28.2613	-3.01822		3.78925	29.1282	-3.59867
	H	2.60906	27.8519	-3.09057		2.49606	28.0161	-3.1445		1.66842	28.107	-3.09336									C	3.38708	26.7005	-3.5637		3.26025	27.1931	-3.35104		2.44343	27.4731	-3.46564
	O	3.33773	27.0271	-4.84642		3.41875	27.1773	-4.805		2.70694	27.5045	-4.76085									H	2.68928	27.4486	-3.15818		2.6131	28.0502	-3.10557		1.56033	28.0523	-3.1739
	C	2.99531	25.7528	-5.3799		3.01821	25.9275	-5.34638		2.67748	26.1811	-5.24893									O	3.20178	26.6429	-4.98653		3.48888	27.167	-4.76897		2.42832	27.3455	-4.8829
	H	1.99529	25.7772	-5.81953		2.01706	25.9897	-5.78648		1.68593	25.9563	-5.66681									C	3.02164	25.3052	-5.43865		3.02941	25.9412	-5.31354		2.55162	25.9971	-5.27318
	N	3.88887	25.4171	-6.47883		3.90971	25.5643	-6.43028		3.62102	26.021	-6.33376									H	1.99612	25.1616	-5.79951		2.0341	26.0584	-5.76022		1.60122	25.6563	-5.70854
	C	5.24755	25.3292	-6.26901		5.25719	25.4279	-6.17658		4.95183	26.2558	-6.11437									N	3.86522	25.0699	-6.60386		3.90408	25.538	-6.394		3.52968	25.8576	-6.33649
	H	5.56784	25.6034	-5.26006		5.56445	25.7427	-5.17583		5.17753	26.708	-5.15861									C	5.23361	25.2024	-6.49749		5.25235	25.385	-6.14809		4.8427	26.1796	-6.11488
	C	6.12628	24.9543	-7.23621		6.13902	24.9546	-7.10133		5.90763	25.9529	-7.01508									H	5.59466	25.4507	-5.4962		5.56777	25.6742	-5.14228		5.04621	26.6308	-5.15329
	C	7.60622	24.8578	-7.02319		7.60754	24.8183	-6.84874		7.36374	26.1986	-6.78736									C	6.07725	25.0804	-7.55318		6.12536	24.9266	-7.08773		5.81718	25.961	-7.02011
	H	7.8792	25.144	-5.99751		7.85457	25.1081	-5.81882		7.55257	26.4296	-5.74524									C	7.56328	25.2434	-7.44769		7.59313	24.7694	-6.84394		7.25109	26.3049	-6.77919
	H	7.96362	23.8314	-7.21135		7.93315	23.7797	-7.0073		7.92808	25.3184	-7.0864									H	7.86169	25.5087	-6.42288		7.84636	25.032	-5.80826		7.41031	26.5811	-5.74264
	H	8.1505	25.5117	-7.7232		8.18242	25.4508	-7.54064		7.69879	27.0263	-7.40923									H	8.08776	24.3183	-7.73953		7.90802	23.7317	-7.02831		7.87774	25.455	-7.04024
	C	5.59047	24.6373	-8.5563		5.62004	24.5808	-8.41269		5.49642	25.3345	-8.2645									H	7.9179	26.0328	-8.12995		8.17111	25.4125	-7.52327		7.54555	27.1316	-7.42323
	O	6.28027	24.2713	-9.51443		6.31792	24.1234	-9.32423		6.26523	24.9009	-9.11536									C	5.4951	24.8119	-8.86367		5.59978	24.6019	-8.40968		5.4522	25.3439	-8.28306
	N	4.22435	24.7746	-8.68991		4.26316	24.7711	-8.58149		4.13553	25.2472	-8.45136									O	6.16103	24.6775	-9.89613		6.29484	24.1896	-9.34368		6.24374	24.9816	-9.14654
	H	3.7826	24.4632	-9.60272		3.83828	24.4154	-9.47636		3.8021	24.8258	-9.36374									N	4.11595	24.7437	-8.89844		4.2382	24.7813	-8.56027		4.10048	25.1659	-8.46944
	C	3.3262	25.1697	-7.7315		3.35901	25.2753	-7.67422		3.15945	25.5585	-7.55165									H	3.65503	24.5758	-9.83373		3.81485	24.4562	-9.46738		3.79143	24.7514	-9.39506
	O	2.12982	25.2751	-7.96581		2.17289	25.4241	-7.94196		1.97285	25.4242	-7.80302									C	3.24786	24.8837	-7.84424		3.33949	25.2573	-7.63443		3.10389	25.4189	-7.57598
	C	2.5259	25.6929	-3.07752		2.47603	25.8626	-3.07849		2.3175	26.0471	-2.92312									O	2.0339	24.8429	-7.98306		2.14679	25.3938	-7.87913		1.92829	25.2431	-7.84562
	H	2.77095	25.3074	-2.07535		2.68841	25.4921	-2.06296		2.76583	25.8099	-1.95196									C	2.98539	25.3095	-3.05314		2.50743	25.8976	-3.03714		2.35055	26.0475	-2.89476
	C	3.02625	24.7893	-4.19702		3.02918	24.9648	-4.17078		2.98692	25.2801	-4.0544									H	3.50018	25.0149	-2.12927		2.68673	25.5232	-2.0199		2.91313	25.9441	-1.96534
	H	4.05302	24.4784	-3.96692		4.05978	24.6867	-3.9157		4.05917	25.239	-3.87072									C	3.32434	24.4145	-4.23337		2.99305	24.9764	-4.13651		2.92945	25.2021	-4.01632
	H	2.40328	23.9022	-4.33135		2.42815	24.0648	-4.32318		2.57559	24.282	-4.15342									H	4.39451	24.1801	-4.17767		4.00836	24.6454	-3.88453		4.01213	25.1713	-3.90033
	O	1.12146	25.9696	-3.16547		1.07956	26.1099	-3.23924		0.92161	25.8371	-2.84535									H	2.76979	23.4749	-4.2435		2.35742	24.1017	-4.29902		2.52801	24.195	-4.02504
	P	-0.0395496	24.8228	-3.47779		-0.0146049	24.8683	-3.43778		0.286195	24.3178	-2.92235									O	1.56968	25.3885	-2.75963		1.10358	26.2116	-3.18678		0.97628	25.7783	-2.59859
	O	-1.36288	25.4667	-3.15522		-1.36379	25.445	-3.10484		-1.10125	24.4322	-2.39862									P	0.407747	24.2971	-2.81467		-0.0810601	25.1322	-3.31295		0.268519	24.3643	-2.65701
	O	0.393737	23.4935	-2.91219		0.537553	23.6074	-2.82752		1.2391	23.318	-2.37009									O	-0.719697	24.6568	-1.92018		-1.38908	25.6583	-2.85561		-1.00479	24.3781	-1.93197
	O	0.0921204	24.6612	-5.12478		0.0812065	24.6345	-5.08453		0.232715	24.0641	-4.5637									O	1.16532	22.9048	-2.55465		0.527147	23.8412	-2.58307		1.34881	23.3194	-2.17238
	C	-0.729198	25.3636	-6.0456		-0.737113	25.3522	-5.99394		-0.903266	24.5035	-5.26494									O	0.00353803	24.1499	-4.37363		-0.0621314	24.6463	-4.86057		0.104707	23.9731	-4.2113
	H	-1.40354	26.0445	-5.50263		-1.46874	25.9684	-5.44817		-1.5925	24.9771	-4.55772									C	-0.836943	25.1275	-5.0175		-0.842227	25.3457	-5.85036		-1.06434	24.4432	-4.87016
	H	-0.0791463	25.9401	-6.7228		-0.103293	25.9989	-6.62162		-0.590035	25.232	-6.02364									H	-1.51915	25.5786	-4.28041		-1.61528	25.9503	-5.35392		-1.84073	24.6351	-4.12458
	C	-1.5591	24.3952	-6.87404		-1.47738	24.3799	-6.88981		-1.62708	23.3516	-5.98535									H	-0.192754	25.9148	-5.43876		-0.172787	25.9962	-6.4317		-0.826125	25.3693	-5.40061
	H	-2.28519	24.9894	-7.45537		-2.212	24.9506	-7.48504		-2.65563	23.6834	-6.18133									C	-1.63877	24.4776	-6.13056		-1.50224	24.3538	-6.78266		-1.54799	23.4114	-5.89222
	O	-0.74897	23.6664	-7.80429		-0.575574	23.7266	-7.79314		-1.04379	23.0876	-7.25338									H	-2.27325	25.2734	-6.55824		-2.23292	24.9186	-7.3875		-2.51333	23.7605	-6.28775
	C	-0.625269	22.3008	-7.43831		-0.462206	22.3458	-7.49046		-0.478436	21.8032	-7.32659									O	-0.785797	23.9756	-7.15552		-0.539951	23.7634	-7.66012		-0.625323	23.3468	-6.96622
	H	-1.095	21.6769	-8.20701		-0.945486	21.748	-8.27237		-0.932992	21.2809	-8.18032									C	-0.803164	22.5514	-7.19978		-0.448301	22.3632	-7.44616		-0.260584	22.015	-7.24633
	N	0.794971	21.9273	-7.46579		0.949494	21.9807	-7.53404		0.941205	21.8733	-7.65154									H	-1.28702	22.2298	-8.12926		-0.937834	21.8183	-8.2625		-0.798346	21.6577	-8.13699
	C	1.63641	22.3952	-6.50002		1.79991	22.549	-6.63149		1.81446	22.4594	-6.80254									N	0.572328	22.0575	-7.3045		0.958004	21.9931	-7.50883		1.14747	21.9655	-7.58291
	H	1.1638	22.9491	-5.69024		1.33193	23.2043	-5.89606		1.39341	22.8772	-5.90082									C	1.38548	21.9796	-6.21137		1.81383	22.5158	-6.58495		2.0611	22.464	-6.72097
	C	2.98027	22.2237	-6.58249		3.14203	22.3388	-6.7015		3.13733	22.5041	-7.07595									H	0.917148	22.1403	-5.2449		1.34988	23.1231	-5.80942		1.65882	22.8961	-5.81644
	H	3.64876	22.5902	-5.80682		3.82578	22.7816	-5.97867		3.83563	22.9538	-6.39239									C	2.71541	21.7367	-6.32159		3.15527	22.31	-6.66723		3.38325	22.416	-6.99525
	C	3.49236	21.6296	-7.78316		3.62309	21.5922	-7.82695		3.57771	21.9185	-8.30284									H	3.35466	21.655	-5.44403		3.84234	22.7108	-5.92328		4.12148	22.7956	-6.31173
	N	4.81008	21.5493	-7.98488		4.93879	21.4221	-8.00374		4.86021	21.8636	-8.61833									C	3.25577	21.6428	-7.64773		3.63076	21.6223	-7.83449		3.77458	21.8343	-8.24297
	H	5.43343	21.9615	-7.30175		5.57723	21.9173	-7.39286		5.54813	22.2724	-8.00985									N	4.57254	21.561	-7.83775		4.94382	21.4712	-8.03269		5.04928	21.7055	-8.5682
	H	5.18962	21.3073	-8.91802		5.28184	21.1336	-8.93182		5.15895	21.3909	-9.48291									H	5.19278	21.5389	-7.03782		5.59138	21.9189	-7.39571		5.7669	22.0315	-7.94383
	N	2.66324	21.1621	-8.72678		2.78295	21.0434	-8.70896		2.69606	21.3918	-9.15321									H	4.96475	21.5385	-8.79599		5.27877	21.2058	-8.97046		5.31281	21.2376	-9.44441
	C	1.31573	21.269	-8.60608		1.4339	21.2001	-8.59766		1.38631	21.3777	-8.89304									N	2.44875	21.6535	-8.7156		2.786	21.115	-8.7365		2.85454	21.3979	-9.10358
	O	0.53594	20.8239	-9.45974		0.636627	20.6897	-9.39713		0.567249	20.91	-9.68426									C	1.1135	21.8477	-8.5998		1.43761	21.2592	-8.60975		1.54842	21.471	-8.83766
	C	-2.29857	23.3233	-6.05033		-2.18325	23.2453	-6.1365		-1.63794	22.0321	-5.18572									O	0.358844	21.8392	-9.58131		0.635738	20.7806	-9.42221		0.690461	21.0835	-9.63125
	H	-2.49634	23.6818	-5.02515		-2.47539	23.5633	-5.12057		-1.23329	22.2089	-4.17959									C	-2.52497	23.2856	-5.71731		-2.20464	23.1752	-6.09172		-1.70946	21.9827	-5.31317
	C	-1.32266	22.1487	-6.07595		-1.13354	22.1469	-6.13201		-0.739837	21.0867	-5.99137									H	-2.84029	23.3572	-4.66088		-2.53615	23.4409	-5.07272		-1.5719	22.0037	-4.22439
	H	-0.619852	22.2374	-5.23903		-0.430531	22.3046	-5.30662		0.19439	20.8979	-5.46614									C	-1.60256	22.0973	-5.97166		-1.13085	22.1007	-6.10602		-0.600821	21.1826	-6.00034
	H	-1.85215	21.1901	-5.99155		-1.59112	21.1526	-6.04505		-1.26574	20.1473	-6.14571									H	-0.963667	21.9448	-5.09502		-0.438226	22.2458	-5.26882		0.271311	21.0974	-5.35471
	O	-3.49598	22.9103	-6.6914		-3.2901	22.7541	-6.87543		-2.92241	21.4642	-5.09872									H	-2.16897	21.1766	-6.16196		-1.56307	21.0932	-6.05321		-0.961629	20.1929	-6.26825
	H	-4.09869	23.6679	-6.71382		-3.92889	23.4767	-6.95214		-3.46555	21.975	-4.48202									O	-3.64297	23.1644	-6.5827		-3.27532	22.6933	-6.88347		-2.94808	21.4084	-5.6389
																					H	-4.20842	23.9399	-6.4538		-3.93807	23.3966	-6.93593		-3.65646	21.8335	-5.13813
																					H	0.570155	22.197	-2.25155		-0.162222	23.3152	-2.1431		0.972091	22.619	-1.63193

## Sheet: DNA-XYZ
OPTIMIZED CARTESIAN COORDINATES (Å) OF DNA FOR SUBSYSTEM SS AND LARGE SYSTEM LS
The bases and backbones are labelled as X1, X2, …, XBB, Y1, Y2, …, YBB. The coordinates of H atoms used saturating the bonds after cutting out the backbones are given at the bottom.
SSBACK-C						SSBACK-N						LSN(BACK-C)
		X	Y	Z				X	Y	Z				X	Y	Z
X1	N	9.98011	13.8396	-11.0714		X1	N	10.1285	13.7234	-11.0533		X1	H	-0.906253	-4.67146	11.9841
	C	10.4429	13.8759	-9.79827			C	10.5852	13.7014	-9.77566			N	-1.21064	-3.66138	11.9583
	H	11.5048	13.7154	-9.67707			H	11.6313	13.4636	-9.64967			C	-0.227085	-2.7001	12.1061
	C	9.60632	14.0826	-8.75744			C	9.75926	13.9569	-8.73819			O	0.946328	-2.98149	12.2994
	H	9.9698	14.1229	-7.74693			H	10.1127	13.9527	-7.72322			N	-0.644738	-1.41095	11.9955
	C	8.21376	14.2415	-9.04475			C	8.38041	14.2129	-9.03149			C	-1.93294	-0.972581	11.8312
	N	7.32708	14.4019	-8.074			N	7.51366	14.4935	-8.07598			O	-2.17328	0.226954	11.7492
	H	7.65243	14.6367	-7.15049			H	7.82788	14.6063	-7.127			C	-2.93088	-2.0191	11.7241
	H	6.3566	14.6181	-8.31985			H	6.54157	14.7044	-8.31723			C	-4.36293	-1.60835	11.6029
	N	7.77095	14.1267	-10.2965			N	7.93661	14.1319	-10.2866			C	-2.51176	-3.29911	11.7539
	C	8.59985	13.9559	-11.3279			C	8.7558	13.9014	-11.312			H	-3.20209	-4.11718	11.6091
	O	8.19147	13.8698	-12.4872			O	8.35766	13.8546	-12.4759			H	-4.59375	-0.914289	12.4082
X2	N	7.88194	16.5327	-13.8805		X2	N	7.83236	16.5257	-13.8451			H	-4.52672	-1.08406	10.6621
	C	9.01205	16.7702	-13.1527			C	8.96415	16.7045	-13.0976			H	-5.01567	-2.47297	11.6595
	H	9.94054	16.6853	-13.6984			H	9.89155	16.551	-13.6289			H	0.094039	-0.666448	12.1641
	C	9.00492	17.0741	-11.8397			C	8.9483	17.0299	-11.791		X2	H	2.43772	-4.16622	15.6443
	C	10.2295	17.4226	-11.0551			C	10.1763	17.3079	-10.9837			N	1.59901	-3.55842	15.4911
	H	11.1047	17.4553	-11.6965			H	11.0563	17.3443	-11.6157			C	0.304779	-3.84855	15.1614
	H	10.078	18.3964	-10.5937			H	10.0459	18.2614	-10.4762			N	-0.450046	-2.79911	15.0291
	H	10.3903	16.7013	-10.2559			H	10.302	16.5479	-10.2146			C	0.382749	-1.72725	15.2697
	C	7.72868	17.1113	-11.1522			C	7.65991	17.1427	-11.1276			C	0.163086	-0.322083	15.2961
	O	7.59158	17.3455	-9.95627			O	7.50854	17.4174	-9.94348			O	-0.881846	0.291283	15.0668
	N	6.64582	16.8057	-11.9322			N	6.57736	16.8818	-11.9267			N	1.30894	0.377758	15.6514
	H	5.69511	16.933	-11.4977			H	5.62312	17.0235	-11.5023			C	2.52492	-0.185562	15.9152
	C	6.64397	16.5375	-13.2659			C	6.58438	16.5754	-13.2501			N	3.52136	0.623723	16.2706
	O	5.60866	16.2844	-13.8621			O	5.55476	16.3547	-13.8673			N	2.74543	-1.48321	15.8752
X3	N	4.72071	19.31	-15.1503		X3	N	4.66904	19.3519	-15.2159			C	1.66392	-2.20075	15.5505
	C	6.06424	19.2151	-14.9317			C	6.01243	19.2309	-14.9868			H	-0.039262	-4.85508	15.0332
	H	6.74784	18.9679	-15.7187			H	6.69619	18.9628	-15.7648			H	1.20863	1.41518	15.7299
	N	6.41255	19.4565	-13.7035			N	6.35444	19.4669	-13.7584			H	3.43413	1.63627	16.1627
	C	5.23278	19.7354	-13.0497			C	5.176	19.7593	-13.1101			H	4.41964	0.201881	16.424
	C	4.94949	20.1458	-11.7201			C	4.89263	20.172	-11.7799		X3	H	4.65724	-1.43097	19.0688
	O	5.74544	20.3161	-10.7963			O	5.69243	20.3573	-10.8622			N	3.60552	-1.37841	19.0495
	N	3.5933	20.3775	-11.521			N	3.53778	20.4062	-11.5809			C	3.00169	-0.122043	19.2181
	H	3.32305	20.7464	-10.5874			H	3.26469	20.7535	-10.636			O	3.71293	0.872924	19.3722
	C	2.62289	20.2081	-12.4676			C	2.56679	20.2561	-12.531			N	1.66829	-0.049391	19.2352
	N	1.35124	20.3849	-12.0951			N	1.30588	20.4984	-12.1782			C	0.90098	-1.12745	19.077
	H	1.13882	20.797	-11.1879			H	1.06043	20.7594	-11.2234			N	-0.409922	-0.9855	19.1944
	H	0.665647	20.4435	-12.8282			H	0.603921	20.4531	-12.8962			C	1.49517	-2.39641	18.7965
	N	2.87267	19.8374	-13.704			N	2.82088	19.9018	-13.775			C	2.84584	-2.46212	18.7846
	C	4.17381	19.6357	-13.9506			C	4.11807	19.6742	-14.0141			H	3.37982	-3.37724	18.5769
X4	N	1.84193	22.851	-14.2818		X4	N	1.78584	22.9355	-14.3505			H	0.887286	-3.26002	18.5941
	C	3.02215	22.5565	-14.9002			C	2.96324	22.6335	-14.9779			H	-1.01526	-1.7816	19.087
	H	3.05742	22.1668	-15.8985			H	2.99155	22.2418	-15.9744			H	-0.802092	-0.078052	19.472
	N	4.07382	22.7829	-14.1702			N	4.01803	22.8494	-14.2526		X4	H	5.2758	2.26205	22.3597
	C	3.57917	23.2498	-12.9761			C	3.53507	23.311	-13.0521			N	4.44941	1.61343	22.3278
	C	4.18116	23.7173	-11.7906			C	4.14579	23.7613	-11.8623			C	4.39325	0.251944	22.2516
	N	5.49389	23.7592	-11.579			N	5.4585	23.8082	-11.6609			N	3.18819	-0.234227	22.3109
	H	6.09871	23.5481	-12.3541			H	6.06411	23.594	-12.4338			C	2.37033	0.864758	22.4156
	H	5.85662	24.2433	-10.7549			H	5.82619	24.2717	-10.8288			C	0.980472	1.03205	22.587
	N	3.34881	24.1193	-10.8094			N	3.31914	24.1427	-10.8699			N	0.110378	0.031039	22.6584
	C	2.03479	24.0777	-10.9863			C	2.00339	24.1106	-11.0368			N	0.538554	2.2975	22.713
	H	1.43828	24.4202	-10.1441			H	1.41834	24.4361	-10.1835			C	1.38384	3.31808	22.6668
	N	1.36734	23.6805	-12.047			N	1.33076	23.7416	-12.1038			N	2.69029	3.27819	22.5286
	C	2.18078	23.2821	-13.0333			C	2.13619	23.352	-13.0988			C	3.15299	2.02632	22.4106
X5	N	0.0920155	26.6506	-12.6616		X5	N	0.0208237	26.8158	-12.6719			H	5.27147	-0.35374	22.1538
	C	0.74491	26.2385	-13.7893			C	0.67803	26.3715	-13.7887			H	0.451171	-0.910365	22.5743
	H	0.218354	25.916	-14.6661			H	0.155457	26.0506	-14.6663			H	-0.877658	0.225044	22.8301
	N	2.03947	26.2855	-13.6898			N	1.96967	26.3838	-13.6714			H	0.933048	4.30047	22.7681
	C	2.28285	26.7475	-12.4155			C	2.21052	26.8508	-12.3997		X5	H	3.52623	5.22699	25.451
	C	3.4816	27.0258	-11.7055			C	3.40936	27.1089	-11.6792			N	3.16821	4.24499	25.561
	O	4.64681	26.8745	-12.0809			O	4.57277	26.9464	-12.0532			C	1.78609	4.04041	25.7219
	N	3.23271	27.5342	-10.438			N	3.1586	27.6004	-10.4045			O	1.03595	5.01626	25.7073
	H	4.07123	27.8205	-9.88308			H	3.99887	27.8757	-9.85128			N	1.34949	2.79921	25.9531
	C	1.99197	27.7195	-9.89847			C	1.9171	27.8122	-9.87166			C	2.17521	1.75231	25.9462
	N	1.91739	28.2777	-8.68919			N	1.83735	28.2881	-8.63152			N	1.68386	0.563124	26.2531
	H	2.7499	28.3752	-8.1036			H	2.67005	28.4585	-8.06528			C	3.5669	1.92757	25.6573
	H	1.00077	28.3421	-8.2836			H	0.916505	28.4655	-8.26958			C	4.00787	3.19163	25.4698
	N	0.873923	27.4315	-10.5302			N	0.799895	27.5783	-10.5307			H	5.03926	3.43358	25.2568
	C	1.06754	26.9647	-11.768			C	0.995	27.1102	-11.7676			H	4.22819	1.0826	25.587
X6	N	0.279018	30.5408	-10.2512		X6	N	0.274273	30.7256	-10.2135			H	2.275	-0.250894	26.2226
	C	0.122221	30.1345	-11.5479			C	0.103479	30.3247	-11.5134			H	0.686349	0.465063	26.4717
	H	-0.833152	29.8563	-11.949			H	-0.85704	30.072	-11.9135		X6	H	-0.163676	6.83089	28.8256
	N	1.22752	30.1292	-12.2282			N	1.20731	30.2782	-12.1912			N	0.15512	5.83366	28.9428
	C	2.19774	30.5338	-11.3361			C	2.1923	30.65	-11.3033			C	-0.798996	4.87192	29.3154
	C	3.59582	30.7391	-11.4754			C	3.59898	30.8103	-11.4388			O	-1.96396	5.22944	29.506
	O	4.29056	30.5864	-12.4833			O	4.28708	30.6412	-12.4473			N	-0.403544	3.61321	29.507
	N	4.17893	31.2068	-10.3042			N	4.19871	31.2288	-10.2561			C	0.866918	3.24309	29.343
	H	5.20137	31.4186	-10.3544			H	5.22277	31.4208	-10.3104			N	1.19739	1.99767	29.6345
	C	3.50531	31.442	-9.13618			C	3.53541	31.4728	-9.08327			C	1.83727	4.18738	28.8794
	N	4.18738	31.9633	-8.11841			N	4.2439	31.8546	-8.02354			C	1.4231	5.45776	28.6683
	H	5.20391	32.0672	-8.15428			H	5.23548	32.0903	-8.09973			H	2.07275	6.23468	28.2913
	H	3.69159	32.0897	-7.25252			H	3.72074	32.1219	-7.20619			H	2.85142	3.88662	28.6852
	N	2.20998	31.2408	-8.99339			N	2.23143	31.3306	-8.95192			H	2.14993	1.69079	29.5353
	C	1.60909	30.7833	-10.097			C	1.61376	30.9219	-10.0643			H	0.476527	1.35394	29.9773
X7	N	1.9727	34.4075	-8.56434		X7	N	2.07672	34.4992	-8.54588		X7	H	-3.68526	6.36447	32.3479
	C	1.00983	33.9571	-9.42348			C	1.08451	34.097	-9.39464			N	-2.82216	5.76165	32.44
	H	0.00190149	33.7711	-9.10867			H	0.0769569	33.9549	-9.06125			C	-3.02293	4.4041	32.5879
	N	1.42258	33.7971	-10.6459			N	1.47558	33.9146	-10.6201			O	-4.13485	3.89905	32.6538
	C	2.75959	34.1187	-10.6127			C	2.82359	34.1831	-10.6056			N	-1.89635	3.65076	32.6913
	C	3.77326	34.1819	-11.5923			C	3.83847	34.1711	-11.5877			C	-0.598874	4.08448	32.6414
	N	3.57789	33.988	-12.8996			N	3.64072	33.9182	-12.8808			O	0.326841	3.28541	32.7421
	H	2.74538	33.4992	-13.1811			H	2.76422	33.5178	-13.1657			C	-0.443227	5.51525	32.465
	H	4.39014	33.9848	-13.5219			H	4.4425	33.8763	-13.5111			C	0.942446	6.07949	32.4521
	N	4.98899	34.5782	-11.1754			N	5.07491	34.5068	-11.1777			C	-1.55717	6.2637	32.3343
	C	5.19316	34.9157	-9.90809			C	5.30535	34.8454	-9.91516			H	-1.49544	7.32322	32.1315
	H	6.20093	35.2315	-9.66987			H	6.32852	35.1118	-9.68392			H	1.48914	5.67346	33.2998
	N	4.31848	34.9348	-8.92621			N	4.44064	34.9042	-8.92763			H	1.46268	5.7754	31.5443
	C	3.11417	34.4937	-9.30868			C	3.20913	34.5443	-9.30571			H	0.911229	7.16292	32.5016
Xbb	P	14.9778	13.9261	-9.96992		Xbb	P	15.1683	13.2904	-9.50935			H	-2.06038	2.62906	32.8862
	O	16.0246	13.6927	-11.0061			O	16.3292	13.3251	-10.4086		X8	H	-6.22863	3.93341	35.697
	O	14.4881	15.2955	-9.67788			O	14.7033	14.6855	-8.94409			N	-5.18491	3.96536	35.6703
	O	13.6774	12.9376	-10.2289			O	13.8158	12.7779	-10.2049			C	-4.29871	4.98944	35.4936
	C	13.7245	11.9781	-11.2523			C	13.9023	11.8493	-11.2726			N	-3.0552	4.62916	35.6064
	H	14.7556	11.8615	-11.6013			H	14.9376	11.776	-11.6171			C	-3.09734	3.27498	35.8592
	H	13.3325	11.0408	-10.8444			H	13.5493	10.8766	-10.921			C	-2.08925	2.31726	36.1465
	C	12.8502	12.399	-12.4406			C	13.0068	12.2979	-12.434			O	-0.871533	2.49696	36.2279
	H	13.0094	11.7066	-13.2766			H	13.1649	11.6095	-13.273			N	-2.6182	1.06299	36.4264
	O	11.4733	12.3532	-12.0802			O	11.6423	12.236	-12.0484			C	-3.94809	0.753769	36.4004
	C	10.883	13.635	-12.1806			C	11.0239	13.5027	-12.1657			N	-4.30386	-0.48203	36.7597
	H	10.2606	13.6903	-13.0869			H	10.3871	13.5256	-13.062			N	-4.89292	1.63139	36.1434
	C	13.1453	13.8351	-12.9045			C	13.284	13.7425	-12.8941			C	-4.42718	2.85785	35.8802
	H	14.1272	14.1834	-12.5603			H	14.2728	14.0822	-12.5753			H	-4.61767	5.99161	35.2854
	C	12.0297	14.639	-12.2539			C	12.1566	14.5328	-12.2498			H	-1.93759	0.301763	36.6411
	H	12.3524	14.9603	-11.2643			H	12.4593	14.8445	-11.2502			H	-3.60859	-1.22766	36.8244
	H	11.7848	15.51	-12.8486			H	11.8742	15.3979	-12.8386			H	-5.27583	-0.71464	36.66
	O	13.1292	13.8487	-14.3179			O	13.2681	13.751	-14.3225		X9	H	-6.30881	0.523211	39.1948
	H	15.3887	13.3227	-8.77816			H	15.3437	15.3862	-9.11467			N	-5.49622	1.18136	39.1754
	P	12.8401	15.221	-15.1886			H	15.2981	12.4976	-8.39584			C	-5.44483	2.52496	38.9403
	O	13.3397	14.9033	-16.5536			P	12.8648	14.9607	-15.2649			N	-4.25541	3.03615	39.0662
	O	13.2874	16.4393	-14.4636			O	13.3944	14.7677	-16.6166			C	-3.44134	1.97049	39.3733
	O	11.1861	15.2486	-15.2104			O	13.2831	16.2731	-14.502			C	-2.07314	1.84638	39.6939
	C	10.5668	14.2775	-16.0191			O	11.2551	15.0737	-15.2277			N	-1.23284	2.87567	39.8105
	H	11.2414	14.0266	-16.845			C	10.5543	14.134	-16.029			N	-1.63633	0.611102	40.0094
	H	10.3647	13.381	-15.4208			H	11.1707	13.8693	-16.8921			C	-2.47146	-0.419961	40.007
	C	9.23396	14.792	-16.5714			H	10.3449	13.2392	-15.4368			N	-3.76088	-0.413887	39.7564
	H	8.85315	14.0656	-17.2998			C	9.21639	14.7129	-16.4985			C	-4.21127	0.80094	39.4258
	O	8.26285	14.9055	-15.5383			H	8.78077	14.0044	-17.2145			H	-6.31871	3.0929	38.6868
	C	7.91922	16.2539	-15.3063			O	8.32716	14.8477	-15.4044			H	-1.50726	3.74729	39.3875
	H	6.88367	16.4157	-15.6491			C	7.89837	16.1856	-15.2516			H	-0.23882	2.67847	39.9451
	C	9.33926	16.1775	-17.2293			H	6.86299	16.2761	-15.6157			H	-2.03649	-1.3793	40.2682
	H	10.3678	16.402	-17.5389			C	9.33538	16.0976	-17.1634		X10	H	-4.31196	-2.30102	42.895
	C	8.89548	17.1114	-16.1104			H	10.3598	16.3029	-17.482			N	-3.93462	-1.32142	42.9315
	H	9.76498	17.3979	-15.5239			C	8.85954	17.0506	-16.0775			C	-2.58878	-1.14251	43.3134
	H	8.43325	18.005	-16.5134			H	9.70933	17.3707	-15.4792			O	-1.90808	-2.1267	43.6036
	O	8.50594	16.1882	-18.3654			H	8.369	17.9219	-16.4966			N	-2.11578	0.098467	43.429
	P	7.92779	17.5964	-19.0167			O	8.51395	16.0824	-18.3307			C	-2.86584	1.1665	43.1578
	O	7.54475	17.2386	-20.4079			H	13.6323	16.9676	-15.0713			N	-2.3663	2.36227	43.4231
	O	8.84354	18.733	-18.7372			P	7.85778	17.3356	-19.049			C	-4.19906	1.00267	42.6612
	O	6.55642	17.8318	-18.1217			O	7.58278	17.0522	-20.4591			C	-4.66889	-0.259556	42.5309
	C	5.46522	17.0015	-18.4424			O	8.79675	18.558	-18.7283			H	-5.64956	-0.482242	42.1343
	H	5.53256	16.7329	-19.5023			O	6.52589	17.7147	-18.2174			H	-4.78563	1.84996	42.3521
	H	5.5066	16.0948	-17.8269			C	5.36853	16.9546	-18.5399			H	-2.86655	3.18242	43.1226
	C	4.128	17.6973	-18.1609			H	5.40384	16.6924	-19.6007			H	-1.37689	2.44023	43.6946
	H	3.31914	17.0811	-18.5715			H	5.35876	16.0428	-17.9365		X11	H	-0.916224	-4.09903	46.8721
	O	3.90205	17.8069	-16.7585			C	4.08218	17.7311	-18.2339			N	-1.23354	-3.08091	46.8333
	C	3.95708	19.1572	-16.3534			H	3.24537	17.1543	-18.646			C	-0.243859	-2.11106	46.819
	H	2.94747	19.4907	-16.0744			O	3.88464	17.845	-16.8338			O	0.933426	-2.3807	46.9795
	C	4.03735	19.1285	-18.7218			C	3.92329	19.1996	-16.4269			N	-0.680012	-0.823015	46.7406
	H	4.69245	19.2636	-19.5909			H	2.9075	19.5262	-16.1657			C	-1.97819	-0.396772	46.597
	C	4.50403	19.9553	-17.5348			C	4.05646	19.1643	-18.7993			O	-2.23146	0.801782	46.5366
	H	5.59287	19.9714	-17.5107			H	4.71378	19.2692	-19.6649			C	-2.96994	-1.45619	46.6033
	H	4.11706	20.9673	-17.5693			C	4.50042	19.9913	-17.6061			C	-4.41455	-1.07582	46.5254
	O	2.7038	19.3708	-19.1172			H	5.58808	19.9875	-17.5537			C	-2.54476	-2.73433	46.6703
	P	1.9133	20.8113	-18.9465			H	4.13478	21.0119	-17.639			H	-3.24782	-3.55164	46.6131
	O	0.659148	20.6264	-19.7211			O	2.72651	19.4377	-19.2422			H	-5.04813	-1.94496	46.6778
	O	2.82119	21.9594	-19.2083			H	8.87603	19.1939	-19.4484			H	-4.62844	-0.309741	47.2671
	O	1.56475	20.8402	-17.3285			P	1.87513	20.767	-19.0814			H	-4.63605	-0.653175	45.5444
	C	0.407038	20.1834	-16.8874			O	0.691568	20.7202	-19.9412			H	0.077217	-0.083598	46.7442
	H	-0.140288	19.8061	-17.7583			O	2.87174	21.9688	-19.3035		X12	H	2.71757	-3.09016	49.7184
	H	0.690903	19.3548	-16.2267			O	1.52316	20.9492	-17.519			N	1.89464	-2.43498	49.7015
	C	-0.507007	21.1347	-16.104			C	0.366294	20.2864	-17.027			C	2.13192	-1.04762	49.6851
	H	-1.47006	20.6385	-15.934			H	-0.202313	19.8914	-17.8727			O	3.29522	-0.646623	49.6551
	O	0.0239002	21.4524	-14.8189			H	0.679439	19.4712	-16.369			N	1.08582	-0.221403	49.7559
	C	0.496959	22.7844	-14.7851			C	-0.533328	21.2322	-16.2179			C	-0.168072	-0.673749	49.7579
	H	-0.103791	23.3491	-14.052			H	-1.49071	20.7227	-16.0616			N	-1.15333	0.203463	49.8535
	C	-0.713989	22.4726	-16.8318			O	0.000946347	21.5177	-14.9346			C	-0.431717	-2.07768	49.6628
	H	-0.539836	22.3624	-17.9105			C	0.437684	22.8607	-14.8423			C	0.633878	-2.90944	49.6329
	C	0.353277	23.3525	-16.1971			H	-0.169074	23.3732	-14.0804			H	0.542857	-3.98397	49.5651
	H	1.28379	23.2398	-16.7503			C	-0.75981	22.5874	-16.908			H	-1.44003	-2.44911	49.6202
	H	0.0562861	24.3942	-16.197			H	-0.617187	22.5127	-17.989			H	-2.1066	-0.113301	49.9119
	O	-2.04079	22.8963	-16.6307			C	0.274292	23.479	-16.2382			H	-0.937467	1.1995	49.9884
	P	-2.49257	24.478	-16.4871			H	1.21471	23.4131	-16.7822		X13	H	5.24449	0.152386	52.9511
	O	-3.97302	24.4538	-16.6061			H	-0.0455032	24.5142	-16.194			N	4.19233	0.199564	52.9847
	O	-1.67114	25.3695	-17.346			O	-2.11227	22.9741	-16.6778			C	3.58475	1.44549	53.2215
	O	-2.07653	24.8109	-14.92			H	2.56733	22.6184	-19.9471			O	4.30068	2.43289	53.3992
	C	-2.94042	24.3338	-13.924			P	-2.69023	24.4467	-16.5477			N	2.25451	1.50856	53.2885
	H	-3.91751	24.1217	-14.3733			O	-4.13373	24.462	-16.7908			C	1.49004	0.425168	53.1561
	H	-2.52999	23.4127	-13.4882			O	-1.79897	25.3617	-17.4693			N	0.182507	0.558545	53.2976
	C	-3.10102	25.3641	-12.8			O	-2.29351	24.9849	-15.08			C	2.08389	-0.840804	52.8499
	H	-3.85887	24.9917	-12.0983			C	-3.14141	24.5584	-14.021			C	3.43176	-0.890812	52.7495
	O	-1.89341	25.521	-12.0686			H	-4.14181	24.3747	-14.4223			H	3.97026	-1.79191	52.492
	C	-1.30145	26.7775	-12.3524			H	-2.7412	23.6358	-13.5916			H	1.4738	-1.71217	52.6906
	H	-1.31078	27.3733	-11.4276			C	-3.21504	25.6077	-12.9046			H	-0.407455	-0.256105	53.2949
	C	-3.48512	26.7668	-13.3071			H	-3.98376	25.2752	-12.1965			H	-0.202908	1.47038	53.5704
	H	-4.01047	26.7012	-14.2689			O	-1.98839	25.694	-12.2009		X14	H	5.76056	3.88481	56.1454
	C	-2.1261	27.432	-13.4585			C	-1.37621	26.957	-12.3937			N	4.88274	3.29815	56.1883
	H	-1.71165	27.1844	-14.4345			H	-1.40502	27.5106	-11.4452			C	3.67103	3.94322	56.0126
	H	-2.1935	28.5076	-13.3392			C	-3.5395	27.0307	-13.3983			O	3.58696	5.14098	55.7935
	O	-4.34895	27.3664	-12.372			H	-4.07507	27.0122	-14.3504			N	2.56715	3.14703	56.0349
	P	-4.25037	28.918	-11.8108			C	-2.16259	27.6639	-13.5035			C	2.52728	1.79951	56.2724
	O	-5.47408	29.0803	-10.9847			H	-1.72988	27.4196	-14.4723			O	1.46426	1.18879	56.2375
	O	-3.93636	29.8753	-12.904			H	-2.18449	28.7405	-13.3719			C	3.81918	1.17617	56.4816
	O	-2.923	28.8855	-10.8322			O	-4.40975	27.6433	-12.448			C	3.84233	-0.281437	56.8142
	C	-3.06881	28.4106	-9.5218			H	-2.30257	25.9971	-17.9911			C	4.91752	1.95358	56.4157
	H	-4.13501	28.275	-9.30587			P	-4.33973	29.0773	-11.7712			H	5.90334	1.52723	56.5296
	H	-2.5494	27.4473	-9.42184			O	-5.5751	29.3448	-11.0333			H	3.31723	-0.852178	56.0511
	C	-2.4688	29.3967	-8.51011			O	-3.9589	30.1041	-12.9077			H	4.86052	-0.644666	56.9146
	H	-2.70278	29.0282	-7.50231			O	-3.01816	29.1415	-10.8574			H	3.31571	-0.429269	57.7559
	O	-1.05608	29.4736	-8.61026			C	-3.11375	28.6582	-9.5236			H	1.64016	3.64762	56.0309
	C	-0.665942	30.7126	-9.19054			H	-4.16618	28.4908	-9.28064		X15	H	4.08237	7.4367	59.1384
	H	-0.105178	31.2735	-8.42873			H	-2.55587	27.7206	-9.45012			N	3.70259	6.46724	59.0623
	C	-2.99206	30.8335	-8.69474			C	-2.51535	29.6517	-8.51637			C	4.34076	5.27579	58.8828
	H	-3.98335	30.8236	-9.16857			H	-2.77447	29.2953	-7.51294			N	3.5425	4.25054	58.8615
	C	-1.94107	31.4368	-9.61284			O	-1.10173	29.7069	-8.59001			C	2.28462	4.77972	59.0491
	H	-2.19039	31.197	-10.645			C	-0.664901	30.9343	-9.15108			C	1.00557	4.17901	59.1935
	H	-1.8751	32.5108	-9.48377			H	-0.0846093	31.4694	-8.38737			O	0.719996	2.98348	59.1198
	O	-3.099	31.4421	-7.43475			C	-3.01306	31.0948	-8.71342			N	0.010755	5.11951	59.4339
	P	-2.64301	32.9952	-7.0865			H	-3.99712	31.1155	-9.18915			C	0.208595	6.47004	59.4924
	O	-3.12578	33.2188	-5.69949			C	-1.92149	31.7005	-9.58069			N	-0.870426	7.25421	59.6107
	O	-3.01489	33.938	-8.17577			H	-2.1375	31.4934	-10.6273			N	1.38504	7.03885	59.3527
	O	-0.998358	32.9273	-7.09412			H	-1.82525	32.7711	-9.43512			C	2.38326	6.16471	59.1704
	C	-0.330186	32.4501	-5.94968			O	-3.16019	31.698	-7.43082			H	5.40447	5.2194	58.7757
	H	-1.05782	32.323	-5.14023			H	-4.57604	30.8404	-12.9847			H	-0.930619	4.73774	59.6545
	H	0.132278	31.4795	-6.17212			P	-2.64631	33.1088	-6.91022			H	-1.75209	6.83807	59.9076
	C	0.760585	33.4375	-5.51212			O	-3.196	33.3821	-5.5815			H	-0.699702	8.21291	59.8625
	H	1.14194	33.1029	-4.53941			O	-2.98076	34.1635	-8.03924		X16	H	0.705293	8.90846	62.4939
	O	1.86483	33.4519	-6.4019			O	-1.04437	33.1144	-6.97003			N	0.986524	7.90236	62.4321
	C	1.9144	34.6554	-7.14179			C	-0.332245	32.6114	-5.8421			C	2.21507	7.35626	62.2055
	H	2.87681	35.1392	-6.91389			H	-1.0158	32.5438	-4.99188			N	2.23407	6.05655	62.233
	C	0.233425	34.8789	-5.41648			H	0.0603912	31.6211	-6.08679			C	0.93478	5.69389	62.4944
	H	-0.863334	34.854	-5.36008			C	0.841776	33.5289	-5.48333			C	0.29005	4.45677	62.6844
	C	0.705378	35.5089	-6.73419			H	1.2636	33.1734	-4.53561			N	0.885441	3.26795	62.5581
	H	-0.0835834	35.4137	-7.47824			O	1.87123	33.4669	-6.45656			N	-1.03028	4.49853	62.9432
	H	0.987609	36.5519	-6.61199			C	2.03239	34.7041	-7.11952			C	-1.66353	5.66123	63.0229
	O	0.783887	35.4872	-4.28236			H	3.01858	35.1147	-6.85784			N	-1.16994	6.86942	62.8596
	H	0.396492	36.3699	-4.17448			C	0.442534	35.0082	-5.33629			C	0.145622	6.84514	62.6134
Y7	N	9.46328	35.1222	-12.905			H	-0.641997	35.0935	-5.19213			H	3.07801	7.9627	62.0157
	C	9.35136	35.0666	-14.2688			C	0.88507	35.6194	-6.67326			H	1.89157	3.26712	62.538
	H	10.2661	35.2589	-14.8106			H	0.0689163	35.5731	-7.39146			H	0.401315	2.43729	62.9095
	C	8.19301	34.8068	-14.9068			H	1.22078	36.6477	-6.56331			H	-2.72444	5.60065	63.2517
	C	8.08168	34.7468	-16.3962			O	1.13255	35.5309	-4.23265		X17	H	-2.53411	8.59063	66.1421
	H	9.06836	34.8024	-16.8455			H	-3.52297	34.8963	-7.72753			N	-1.75085	7.91535	66.0046
	H	7.59643	33.8165	-16.6839			H	0.840485	36.4361	-4.06274			C	-0.43377	8.11256	65.7028
	H	7.45955	35.5645	-16.753		Y7	N	9.53942	35.029	-12.8944			N	0.25475	7.01405	65.6144
	C	7.00515	34.5722	-14.105			C	9.43396	34.943	-14.259			C	-0.649918	6.00854	65.8721
	O	5.90212	34.2772	-14.5495			H	10.3382	35.1606	-14.8066			C	-0.52195	4.59694	65.9444
	N	7.18379	34.7386	-12.7504			C	8.28948	34.6278	-14.8964			O	0.48204	3.91035	65.7327
	H	6.32795	34.6316	-12.1402			C	8.19297	34.5175	-16.3834			N	-1.71885	3.97873	66.28
	C	8.35034	34.9949	-12.0947			H	9.17835	34.5653	-16.8356			C	-2.90221	4.62716	66.4981
	O	8.39702	35.1193	-10.8831			H	7.70503	33.5826	-16.6498			N	-3.97323	3.89123	66.792
Y6	N	8.89203	32.3706	-9.45376			H	7.57458	35.3235	-16.7749			N	-3.04253	5.93225	66.4022
	C	9.58103	32.3159	-10.6116			C	7.09653	34.402	-14.0972			C	-1.90402	6.56945	66.1102
	H	10.6323	32.555	-10.5433			O	6.0027	34.0661	-14.534			H	-0.024728	9.09324	65.5621
	C	8.97617	31.9818	-11.7737			N	7.26579	34.6058	-12.7462			H	-1.66322	2.95343	66.456
	H	9.52463	31.9244	-12.6974			H	6.40102	34.5302	-12.141			H	-3.90359	2.88055	66.9094
	C	7.57229	31.7098	-11.7311			C	8.4151	34.9343	-12.093			H	-4.81038	4.38372	67.0457
	N	6.90641	31.3833	-12.8277			O	8.45036	35.1012	-10.8875		X18	H	-4.75814	5.90354	69.5831
	H	7.40615	31.1991	-13.6815		Y6	N	8.92214	32.4061	-9.43349			N	-3.72367	5.83762	69.4743
	H	5.92337	31.0995	-12.755			C	9.61816	32.3088	-10.5884			C	-2.77124	6.78579	69.2323
	N	6.89903	31.815	-10.5858			H	10.6633	32.5706	-10.5239			N	-1.56206	6.31285	69.1951
	C	7.50114	32.1571	-9.44405			C	9.02257	31.9059	-11.7316			C	-1.70138	4.96026	69.4175
	O	6.89059	32.2604	-8.38132			H	9.56564	31.8087	-12.6541			C	-0.76045	3.90315	69.5392
Y5	N	6.36109	29.2537	-7.06976			C	7.62074	31.6126	-11.6757			O	0.465235	3.95508	69.4238
	C	7.5556	29.4797	-7.65846			N	6.98203	31.1376	-12.7296			N	-1.37203	2.68739	69.8272
	H	8.30305	29.9536	-7.03847			H	7.4627	31.0049	-13.6032			C	-2.71884	2.50094	69.9728
	C	7.78404	29.1178	-8.94206			H	5.9774	30.9395	-12.6732			N	-3.16027	1.25837	70.1879
	H	8.74104	29.27	-9.40878			N	6.93741	31.7936	-10.546			N	-3.5996	3.46953	69.8486
	C	6.69965	28.5329	-9.67			C	7.52469	32.2213	-9.42682			C	-3.05215	4.66293	69.5887
	N	6.84389	28.1338	-10.9215			O	6.90978	32.4008	-8.37926			H	-3.01836	7.81931	69.091
	H	7.75722	28.125	-11.3437		Y5	N	6.32737	29.3517	-7.07255			H	-0.726096	1.89854	70.0393
	H	6.064	27.6647	-11.3933			C	7.52145	29.5663	-7.67311			H	-2.50311	0.529627	70.4725
	N	5.50254	28.4031	-9.09607			H	8.26692	30.0559	-7.06447			H	-4.12097	1.17168	70.4757
	C	5.29173	28.7406	-7.82302			C	7.74058	29.1777	-8.94862		X19	H	-4.88003	2.32592	73.1374
	O	4.19712	28.5874	-7.27595			H	8.69156	29.3147	-9.4307			N	-4.02117	2.91094	73.0145
Y4	N	3.62164	25.7415	-6.3091			C	6.64555	28.5831	-9.65798			C	-3.89949	4.23695	72.7191
	C	4.94565	25.9596	-6.04931			N	6.78557	28.1447	-10.8943			N	-2.67148	4.66348	72.6884
	H	5.16314	26.3266	-5.05627			H	7.68663	28.162	-11.3404			C	-1.90846	3.55659	72.9716
	C	5.92572	25.7407	-6.94973			H	5.99475	27.6917	-11.3647			C	-0.525471	3.34226	73.1359
	C	7.38406	25.887	-6.64589			N	5.45277	28.4674	-9.07407			N	0.407655	4.2797	72.9845
	H	7.54613	25.9485	-5.57468			C	5.24476	28.8347	-7.80985			N	-0.142883	2.08677	73.4369
	H	7.917	25.0368	-7.06459			O	4.15938	28.6943	-7.25008			C	-1.04416	1.12344	73.5807
	H	7.78106	26.7838	-7.11908		Y4	N	3.59167	25.7441	-6.37407			N	-2.34972	1.20913	73.4633
	C	5.54574	25.321	-8.28673			C	4.91204	25.9998	-6.11967			C	-2.74747	2.45222	73.1665
	O	6.33448	25.0839	-9.19294			H	5.11592	26.3831	-5.13082			H	-4.75199	4.85783	72.5263
	N	4.19505	25.1796	-8.48522			C	5.89172	25.7961	-7.02219			H	0.10404	5.22859	72.8529
	H	3.87514	24.8298	-9.42913			C	7.34851	25.9756	-6.73144			H	1.37266	4.08203	73.2559
	C	3.20027	25.4006	-7.58134			H	7.52751	26.0168	-5.66286			H	-0.643522	0.145138	73.8297
	O	2.02466	25.2588	-7.87652			H	7.89635	25.1457	-7.17198		X20	H	-3.30421	-0.469709	76.8137
Y3	N	1.36713	22.0502	-7.46076			H	7.71681	26.8861	-7.19982			N	-2.92526	0.488296	76.6536
	C	2.29305	22.4747	-6.57561			C	5.51345	25.3514	-8.35463			C	-3.54017	1.67733	76.3846
	H	1.90533	22.8925	-5.65722			O	6.30412	25.1191	-9.25968			N	-2.71702	2.67594	76.265
	C	3.61399	22.3597	-6.83697			N	4.16524	25.178	-8.54623			C	-1.4664	2.13032	76.4544
	H	4.35748	22.6861	-6.13165			H	3.85119	24.8196	-9.49287			C	-0.160964	2.68772	76.4563
	C	3.98657	21.7748	-8.08963			C	3.16945	25.374	-7.64002			O	0.167188	3.86329	76.2659
	N	5.2482	21.4891	-8.36337			O	1.99763	25.1857	-7.91132			N	0.813868	1.7369	76.7245
	H	5.97458	21.7544	-7.71901		Y3	N	1.2639	21.901	-7.47113			C	0.577426	0.411667	76.965
	H	5.48738	21.0699	-9.27145			C	2.18872	22.3907	-6.61572			N	1.6163	-0.366495	77.2565
	N	3.0578	21.474	-8.99779			H	1.79817	22.7963	-5.69468			N	-0.625929	-0.120586	76.9497
	C	1.75839	21.6357	-8.74941			C	3.50376	22.3615	-6.91807			C	-1.59634	0.761662	76.69
	O	0.886566	21.3965	-9.58942			H	4.25281	22.7296	-6.24059			H	-4.60483	1.75993	76.2905
Y2	N	0.505872	18.0843	-9.62473			C	3.87382	21.8053	-8.18554			H	1.7905	2.0905	76.7901
	C	0.836584	18.6045	-8.40732			N	5.14306	21.6571	-8.51897			H	2.57158	-0.019126	77.1938
	H	0.092412	18.9483	-7.7151			H	5.86943	21.9209	-7.87513			H	1.42305	-1.32949	77.4703
	N	2.11543	18.6436	-8.17726			H	5.38989	21.1972	-9.40488		X21	H	0.347971	-1.56651	80.1242
	C	2.6924	18.1374	-9.31847			N	2.93857	21.4225	-9.05446			N	0.032934	-0.574052	80.0251
	C	4.02387	17.8396	-9.67885			C	1.64032	21.4766	-8.76105			C	-1.21523	-0.053419	79.854
	N	5.0699	17.9967	-8.87826			O	0.760479	21.1406	-9.55481			N	-1.24894	1.24698	79.8427
	H	4.91906	18.4484	-7.99381		Y2	N	0.371382	17.8599	-9.64701			C	0.060722	1.63414	79.9997
	H	6.01249	17.7979	-9.22562			C	0.667704	18.359	-8.40948			C	0.701516	2.88271	80.1283
	N	4.2081	17.309	-10.904			H	-0.0975906	18.6425	-7.71626			N	0.073824	4.05577	80.1294
	C	3.17151	17.0758	-11.6961			N	1.93947	18.4672	-8.1708			N	2.03859	2.8606	80.2934
	H	3.41695	16.6596	-12.669			C	2.55236	18.0279	-9.31974			C	2.69291	1.70702	80.3461
	N	1.89339	17.2715	-11.4506			C	3.9009	17.8345	-9.6921			N	2.19916	0.492569	80.2696
	C	1.69234	17.8041	-10.2382			N	4.93971	18.0898	-8.90757			C	0.870844	0.495744	80.0998
Y1	N	1.15623	13.9763	-11.6543			H	4.76304	18.3708	-7.95985			H	-2.08127	-0.675125	79.7398
	C	0.719516	14.4931	-10.4634			H	5.88572	17.8756	-9.22883			H	-0.91622	4.07257	79.9578
	H	-0.32019	14.6525	-10.2534			N	4.11894	17.3611	-10.9341			H	0.601445	4.91877	80.2616
	N	1.67552	14.7564	-9.62466			C	3.10135	17.0875	-11.7388			H	3.7684	1.78591	80.4763
	C	2.83392	14.431	-10.2934			H	3.37469	16.7189	-12.7223		X22	H	4.01717	-0.752267	83.4744
	C	4.20544	14.5184	-9.91774			N	1.81512	17.1988	-11.4892			N	3.17443	-0.133517	83.4091
	O	4.67897	14.9021	-8.84704			C	1.57774	17.6646	-10.2569			C	1.85281	-0.436562	83.2713
	N	5.04635	14.0442	-10.915		Y1	N	1.32616	13.9056	-11.6104			N	1.06731	0.601094	83.2666
	H	6.07271	14.1112	-10.7232			C	0.887186	14.3798	-10.4032			C	1.90985	1.67846	83.391
	C	4.63721	13.5643	-12.125			H	-0.155872	14.4911	-10.1865			C	1.70876	3.06879	83.4874
	N	5.57144	13.009	-12.9194			N	1.84318	14.6674	-9.5747			N	0.517581	3.66467	83.4612
	H	6.53621	13.3284	-12.7985			C	3.00317	14.3927	-10.2621			N	2.81307	3.82982	83.6008
	H	5.27846	12.8919	-13.8767			C	4.37646	14.5221	-9.90699			C	4.01656	3.27166	83.6445
	N	3.37258	13.4807	-12.4848			O	4.85351	14.927	-8.84534			N	4.32025	1.99534	83.597
	C	2.51651	13.9571	-11.5671			N	5.21777	14.0996	-10.9264			C	3.23333	1.22498	83.4645
Ybb	P	13.3422	35.0155	-16.2069			H	6.24332	14.1558	-10.7287			H	1.50439	-1.44608	83.1777
	O	14.7555	35.1814	-15.7582			C	4.80862	13.6175	-12.1376			H	-0.301839	3.08348	83.4797
	O	12.7419	33.6683	-16.3374			N	5.74652	13.1396	-12.9629			H	0.450085	4.66602	83.6483
	O	12.3348	35.9396	-15.2844			H	6.72256	13.4191	-12.8315			H	4.84742	3.9648	83.7401
	C	12.863	36.9274	-14.4393			H	5.44176	12.9426	-13.901		X23	H	6.67867	1.81091	86.706
	H	13.9393	37.023	-14.6148			N	3.54111	13.5087	-12.4837			N	5.63214	1.82472	86.6817
	H	12.343	37.8669	-14.6523			C	2.68592	13.9251	-11.5401			C	4.68506	0.843012	86.5856
	C	12.6338	36.5614	-12.9675		Ybb	P	12.996	35.7205	-16.7403			N	3.46521	1.29439	86.5741
	H	13.1568	37.281	-12.3263			O	14.4478	35.945	-16.7357			C	3.58713	2.66496	86.6438
	O	11.2457	36.6163	-12.6494			O	12.5236	34.2545	-17.0579			C	2.64186	3.72777	86.6618
	C	10.7563	35.3437	-12.287			O	12.3073	35.962	-15.3081			O	1.41018	3.66254	86.6206
	H	10.5779	35.309	-11.2008			C	12.8144	36.9894	-14.4732			N	3.25622	4.96964	86.7717
	C	13.1069	35.1384	-12.6322			H	13.8737	37.1484	-14.6939			C	4.60349	5.18227	86.837
	H	13.8429	34.7658	-13.3558			H	12.2547	37.9111	-14.6531			N	5.03758	6.43081	87.0228
	C	11.8204	34.3271	-12.7006			C	12.6365	36.6023	-12.9998			N	5.48588	4.2092	86.8188
	H	11.6694	33.9789	-13.7218			H	13.1487	37.3541	-12.3881			C	4.94144	2.99362	86.6983
	H	11.8762	33.4707	-12.0393			O	11.2614	36.6089	-12.6445			H	4.938	-0.197639	86.5374
	O	13.6924	35.1701	-11.3476			C	10.8175	35.3211	-12.269			H	2.62554	5.79694	86.8103
	H	13.1507	35.7304	-17.3957			H	10.6197	35.307	-11.1869			H	4.42234	7.22355	86.8451
	P	13.9879	33.7816	-10.5016			C	13.1769	35.2011	-12.6615			H	6.03493	6.55739	86.9799
	O	15.0832	34.1339	-9.5587			H	13.9214	34.8686	-13.388		X24	H	6.96582	5.76427	89.4011
	O	14.0852	32.6066	-11.406			C	11.9251	34.3364	-12.6688			N	6.06095	5.21918	89.4639
	O	12.5797	33.6185	-9.64232			H	11.7556	33.9614	-13.6773			C	4.88092	5.93949	89.5439
	C	12.3983	34.5634	-8.61284			H	12.0098	33.5059	-11.9773			O	4.84765	7.15611	89.5004
	H	13.3528	34.7123	-8.09669			O	13.8181	35.2875	-11.3881			N	3.7459	5.19223	89.6443
	H	12.0745	35.5148	-9.05126			H	13.251	33.6428	-17.2198			C	3.65953	3.82511	89.7615
	C	11.3262	34.0994	-7.6227			H	12.263	36.4924	-17.6108			O	2.57165	3.28484	89.9062
	H	11.2535	34.8434	-6.81893			P	14.0994	34.0843	-10.3945			C	4.9272	3.12307	89.667
	O	10.0603	34.0246	-8.26798			O	15.227	34.3777	-9.50724			C	4.90012	1.6342	89.7957
	C	9.55653	32.7084	-8.21523			O	14.1924	32.7984	-11.2973			C	6.04958	3.85122	89.5004
	H	8.78014	32.6411	-7.43866			O	12.7261	33.8139	-9.58584			H	7.01526	3.38219	89.3823
	C	11.5865	32.7117	-7.00474			C	12.4692	34.7338	-8.53367			H	5.89931	1.23845	89.9456
	H	12.6469	32.4366	-7.0483			H	13.3857	34.8907	-7.95923			H	4.26974	1.36701	90.6416
	C	10.74	31.802	-7.88198			H	12.1461	35.6872	-8.96091			H	4.45541	1.18232	88.9106
	H	11.3062	31.5474	-8.77745			C	11.3506	34.2061	-7.63442			H	2.84884	5.73042	89.7903
	H	10.4499	30.8997	-7.35571			H	11.1979	34.9348	-6.82712		X25	H	5.58811	9.36425	92.7979
	O	11.1741	32.755	-5.6567			O	10.1604	34.0917	-8.39398			N	5.16256	8.39875	92.8646
	P	10.7209	31.3974	-4.82292			C	9.58522	32.8144	-8.21911			C	3.79924	8.2831	93.1868
	O	10.7776	31.8016	-3.3945			H	8.80236	32.8525	-7.44709			O	3.16108	9.30238	93.4613
	O	11.4463	30.2018	-5.32615			C	11.6265	32.8223	-7.00435			N	3.23761	7.07141	93.1851
	O	9.13836	31.2278	-5.2818			H	12.6839	32.5563	-7.06045			C	3.94905	5.96681	92.9719
	C	8.19006	32.0443	-4.63871			C	10.7397	31.888	-7.81097			N	3.32308	4.79708	92.9816
	H	8.63864	32.4502	-3.72606			H	11.2864	31.5502	-8.6906			C	5.33872	6.05812	92.6514
	H	7.89786	32.8597	-5.31109			H	10.407	31.0353	-7.22894			C	5.88443	7.29366	92.5847
	C	6.92273	31.2575	-4.28124			O	11.2712	32.9091	-5.62444			H	6.91276	7.46507	92.3016
	H	6.29185	31.8871	-3.64214			H	14.7657	32.1058	-10.9502			H	5.922	5.17349	92.4656
	O	6.16905	30.9493	-5.44925			P	10.7998	31.7166	-4.69016			H	3.87161	3.95331	93.0097
	C	6.13547	29.5591	-5.66946			O	10.9578	32.0626	-3.27661			H	2.35636	4.75457	93.3291
	H	5.12356	29.1816	-5.45726			O	11.5613	30.4443	-5.22163		X26	H	2.8589	11.3913	96.2921
	C	7.20814	29.919	-3.57704			O	9.2725	31.3672	-5.08518			N	3.09489	10.359	96.3118
	H	8.1943	29.9233	-3.09549			C	8.26323	32.1395	-4.44749			C	2.03252	9.47693	96.363
	C	7.16245	28.9278	-4.73084			H	8.64054	32.4914	-3.48414			O	0.86701	9.84739	96.3976
	H	8.14697	28.8771	-5.19297			H	8.01129	32.9945	-5.08046			N	2.35477	8.15555	96.3361
	H	6.86057	27.9456	-4.38829			C	6.98799	31.3157	-4.24385			C	3.61146	7.61527	96.3077
	O	6.21887	29.7129	-2.59429			H	6.30941	31.9085	-3.61727			O	3.77006	6.39905	96.2472
	P	5.7646	28.2104	-2.07637			O	6.36225	31.0776	-5.49283			C	4.69209	8.57941	96.2997
	O	5.0646	28.4523	-0.788717			C	6.12881	29.7001	-5.68376			C	6.09407	8.06139	96.3593
	O	6.87954	27.2341	-2.18031			H	5.07769	29.4583	-5.46769			C	4.37396	9.88871	96.2734
	O	4.64818	27.7767	-3.22605			C	7.22072	29.9435	-3.57693			H	5.14621	10.64	96.2024
	C	3.41712	28.4476	-3.16129			H	8.19853	29.8956	-3.09313			H	6.19309	7.43883	97.2466
	H	3.23385	28.7516	-2.12471			C	7.08838	28.9675	-4.73509			H	6.30382	7.43533	95.4936
	H	3.44435	29.3369	-3.80322			H	8.06153	28.8381	-5.20671			H	6.80436	8.88035	96.4074
	C	2.2735	27.5512	-3.64604			H	6.69614	28.0084	-4.41719			H	1.55283	7.48256	96.476
	H	1.32641	28.0815	-3.48111			O	6.22815	29.7808	-2.56469		X27	H	-0.529262	11.4071	99.8731
	O	2.38801	27.3007	-5.04257			H	11.8127	29.8098	-4.54104			N	0.230133	10.705	99.7099
	C	2.6044	25.9303	-5.2884			P	5.68029	28.4062	-1.99274			C	1.54331	10.8664	99.3695
	H	1.68884	25.4964	-5.72269			O	5.09504	28.5825	-0.662415			N	2.19781	9.74941	99.2562
	C	2.22237	26.178	-2.95139			O	6.86466	27.379	-2.13943			C	1.27262	8.76622	99.5316
	H	2.74632	26.2003	-1.98797			O	4.62247	27.8295	-3.06994			C	1.37599	7.35218	99.6361
	C	2.93905	25.2766	-3.94756			C	3.32601	28.4088	-3.01901			O	2.37228	6.65036	99.4458
	H	4.00658	25.3122	-3.74188			H	3.0808	28.6446	-1.98028			N	0.176059	6.76756	100.015
	H	2.57973	24.2559	-3.88197			H	3.31764	29.325	-3.61513			C	-0.996188	7.44033	100.217
	O	0.870536	25.8508	-2.72462			C	2.28234	27.4554	-3.60572			N	-2.09019	6.72501	100.47
	P	0.339451	24.2913	-2.60838			H	1.29641	27.9153	-3.45827			N	-1.10318	8.75063	100.13
	O	-0.999935	24.3867	-1.97415			O	2.50954	27.2941	-4.99484			C	0.041248	9.36104	99.8048
	O	1.39255	23.4007	-2.05891			C	2.59375	25.9311	-5.34032			H	1.97628	11.8346	99.2203
	O	0.154388	23.8782	-4.20653			H	1.64541	25.5979	-5.78849			H	0.210665	5.7468	100.219
	C	-0.966071	24.4186	-4.85039			C	2.27036	26.0471	-2.97341			H	-2.01679	5.72598	100.669
	H	-1.75901	24.5834	-4.11205			H	2.82024	26.0254	-2.03044			H	-2.90969	7.22864	100.757
	H	-0.704293	25.3768	-5.31923			C	2.90742	25.1713	-4.04213		X28	H	-2.68897	8.97828	103.428
	C	-1.46087	23.4748	-5.94958			H	3.98159	25.1252	-3.87287			N	-1.65295	8.8349	103.308
	H	-2.3937	23.8811	-6.36487			H	2.49436	24.1685	-4.04184			C	-1.14834	7.52657	103.372
	O	-0.502361	23.4077	-6.99727			O	0.909148	25.7234	-2.68686			O	-1.94206	6.5922	103.511
	C	-0.0386223	22.0788	-7.14405			H	6.88976	26.6969	-1.45875			N	0.170084	7.33528	103.279
	H	-0.540727	21.6174	-8.00742			P	0.288503	24.2698	-2.56077			C	1.01165	8.35538	103.117
	C	-1.69561	22.0317	-5.45939			O	-0.948351	24.285	-1.77787			N	2.31196	8.10538	103.082
	H	-1.84937	22.009	-4.37276			O	1.4615	23.3497	-2.05726			C	0.510468	9.68159	102.933
	C	-0.399982	21.3436	-5.85521			O	0.0665021	23.7206	-4.0662			C	-0.824064	9.86401	103.036
	H	0.346636	21.5207	-5.08258			C	-1.11457	24.1739	-4.71154			H	-1.29181	10.8292	102.91
	H	-0.542568	20.2806	-6.00923			H	-1.90809	24.2842	-3.96799			H	1.17815	10.4986	102.725
	O	-2.85302	21.5292	-6.08492			H	-0.917981	25.1394	-5.1853			H	2.95758	8.87611	103.047
	P	-3.04825	19.96	-6.56578			C	-1.54508	23.1916	-5.804			H	2.65721	7.1811	103.369
	O	-4.49104	19.8547	-6.90174			H	-2.50697	23.5372	-6.20402		X29	H	-3.08998	5.4451	107.033
	O	-2.41399	19.0213	-5.60329			O	-0.587718	23.1915	-6.85043			N	-2.20244	5.95962	106.841
	O	-2.14475	19.8924	-7.94842			C	-0.128434	21.8793	-7.10206			C	-1.97885	7.25451	106.473
	C	-2.75461	20.2458	-9.15881			H	-0.656465	21.4576	-7.96848			N	-0.720028	7.56378	106.382
	H	-3.80012	20.5138	-8.96858			C	-1.69368	21.7324	-5.32345			C	-0.04745	6.40647	106.709
	H	-2.22631	21.1055	-9.59407			H	-1.80295	21.6751	-4.23829			C	1.33291	6.11229	106.873
	C	-2.71031	19.0876	-10.1644			C	-0.418382	21.0785	-5.82583			O	2.29064	6.87073	106.705
	H	-3.39	19.3324	-10.9909			H	0.37556	21.231	-5.0961			N	1.54528	4.7979	107.272
	O	-1.42276	18.912	-10.7306			H	-0.538375	20.0185	-6.01923			C	0.558708	3.87593	107.487
	C	-0.781288	17.7745	-10.1826			O	-2.8919	21.2088	-5.89848			N	0.917729	2.63101	107.808
	H	-0.556628	17.0905	-11.0174			H	1.18731	22.6229	-1.48669			N	-0.722445	4.13951	107.351
	C	-3.09456	17.7411	-9.5257			P	-3.16519	19.7338	-6.41531			C	-0.973044	5.40255	106.987
	H	-3.70732	17.9074	-8.62779			O	-4.59923	19.5142	-6.60771			H	-2.78415	7.93495	106.282
	C	-1.73739	17.1557	-9.16082			O	-2.41839	18.7692	-5.41683			H	2.53198	4.53096	107.47
	H	-1.47859	17.4742	-8.15329			O	-2.2982	19.5201	-7.75823			H	1.88477	2.41409	108.051
	H	-1.75328	16.0733	-9.20639			C	-2.87966	19.9448	-8.98265			H	0.178702	2.01672	108.106
	O	-3.84022	16.9976	-10.4496			H	-3.91759	20.2333	-8.79904		X30	H	-1.14069	2.5551	110.657
	P	-3.7051	15.3585	-10.6461			H	-2.31114	20.7971	-9.36574			N	-0.778622	3.52906	110.547
	O	-4.84763	14.9951	-11.5238			C	-2.84892	18.842	-10.052			C	-1.39363	4.70514	110.221
	O	-3.49319	14.6515	-9.35522			H	-3.55266	19.1317	-10.8404			N	-0.576611	5.71185	110.126
	O	-2.29932	15.2097	-11.4914			O	-1.57995	18.7123	-10.6658			C	0.671355	5.18746	110.386
	C	-2.32699	15.5735	-12.8543			C	-0.90698	17.5476	-10.2326			C	1.97652	5.75266	110.419
	H	-3.37044	15.5951	-13.1889			H	-0.665806	16.9459	-11.1218			O	2.30797	6.92172	110.207
	H	-1.89298	16.5747	-12.978			C	-3.21042	17.4525	-9.50216			N	2.94397	4.81122	110.749
	C	-1.52769	14.5747	-13.7013			H	-3.81	17.5302	-8.59115			C	2.70549	3.49512	111.026
	H	-1.71924	14.8107	-14.7558			C	-1.84686	16.8207	-9.25455			N	3.72857	2.74124	111.432
	O	-0.130176	14.7051	-13.5			H	-1.53741	17.014	-8.22951			N	1.50623	2.95902	110.986
	C	0.39935	13.5858	-12.8193			H	-1.86314	15.7501	-9.42643			C	0.543551	3.82378	110.646
	H	1.1437	13.1174	-13.4814			O	-4.01358	16.7929	-10.4759			H	-2.45222	4.77106	110.069
	C	-1.89772	13.111	-13.4064			H	-2.95801	18.0406	-5.08996			H	3.92716	5.1459	110.769
	H	-2.8716	13.0829	-12.8978			P	-3.99277	15.2559	-10.8692			H	4.68685	3.0496	111.276
	C	-0.770314	12.6516	-12.4739			O	-5.15931	14.915	-11.6857			H	3.5391	1.7575	111.535
	H	-1.0716	12.8132	-11.4404			O	-3.81808	14.4671	-9.51371		X31	H	2.53423	1.07139	114.082
	H	-0.497028	11.6109	-12.6312			O	-2.59043	14.9645	-11.5951			N	2.26295	2.09226	114.154
	O	-1.94244	12.4079	-14.6156			C	-2.51624	15.2753	-12.9826			C	3.28575	3.0166	114.241
	H	-2.16782	11.481	-14.4362			H	-3.4978	15.1202	-13.4378			O	4.45715	2.70453	114.377
							H	-2.21549	16.3196	-13.1014			N	2.89721	4.32196	114.229
When Xbb and Ybb are cut out, the bases							C	-1.46679	14.3857	-13.6476			C	1.61858	4.80936	114.147
are saturated with H atoms at the							H	-1.49815	14.568	-14.7307			O	1.4232	6.02133	114.124
following coordinates.							O	-0.184571	14.7368	-13.1572			C	0.583452	3.79653	114.094
							C	0.53547	13.5878	-12.7651			C	-0.843354	4.24256	114.088
X1	H	10.6347	13.6913	-11.8756			H	1.24977	13.3047	-13.5529			C	0.96368	2.50307	114.04
X2	H	7.90897	16.3306	-14.9142			C	-1.67764	12.8763	-13.4045			H	0.238116	1.71312	113.907
X3	H	4.16708	19.1992	-16.0225			H	-2.63991	12.7084	-12.9048			H	-0.977728	4.99573	114.861
X4	H	0.866826	22.8027	-14.6467			C	-0.500105	12.4835	-12.5027			H	-1.08815	4.70589	113.132
X5	H	-0.918246	26.7426	-12.4375			H	-0.796754	12.5015	-11.4557			H	-1.5053	3.4002	114.259
X6	H	-0.406078	30.6653	-9.48223			H	-0.100948	11.5048	-12.7569			H	3.68646	5.02248	114.245
X7	H	1.93043	34.5872	-7.53299			O	-1.65888	12.2388	-14.655		X32	H	6.2743	1.49659	116.936
Y7	H	10.4007	35.2828	-12.4569			H	-4.31362	13.6413	-9.47396			N	5.46261	2.15237	117.08
Y6	H	9.3738	32.6155	-8.55583			H	-1.85133	11.2971	-14.5429			C	5.72983	3.50264	116.995
Y5	H	6.19752	29.4751	-6.05454									O	6.85179	3.95241	116.813
Y4	H	2.88414	25.8784	-5.5691		When Xbb and Ybb are cut out, the bases							N	4.6604	4.3198	117.196
Y3	H	0.34796	22.071	-7.23115		are saturated with H atoms at the							C	3.36225	3.94715	117.418
Y2	H	-0.427319	17.8597	-10.0292		following coordinates.							O	2.50038	4.8031	117.606
Y1	H	0.607493	13.6932	-12.4989									C	3.1262	2.518	117.43
						X1	H	10.766	13.566	-11.846			C	1.73426	2.02997	117.681
						X2	H	7.879	16.284	-14.845			C	4.18363	1.70368	117.231
						X3	H	4.132	19.243	-16.088			H	4.06472	0.630761	117.181
						X4	H	0.809	22.846	-14.665			H	1.09746	2.27116	116.831
						X5	H	-0.984	26.917	-12.472			H	1.73214	0.957287	117.842
						X6	H	-0.401	30.876	-9.45			H	1.33094	2.54636	118.549
						X7	H	2.045	34.645	-7.527			H	4.87917	5.34602	117.214
						Y7	H	10.446	35.236	-12.451		X33	H	9.19575	4.48172	119.786
						Y6	H	9.396	32.697	-8.566			N	8.15048	4.4514	119.873
						Y5	H	6.186	29.6	-6.083			C	7.26711	3.41653	119.779
						Y4	H	2.883	25.877	-5.639			N	6.02569	3.76289	119.959
						Y3	H	0.269	21.885	-7.207			C	6.06276	5.12336	120.16
						Y2	H	-0.543	17.637	-10.066			C	5.09066	6.1008	120.46
						Y1	H	0.758	13.678	-12.439			N	3.79678	5.85394	120.647
													N	5.53851	7.35968	120.639
													C	6.82859	7.64444	120.531
													N	7.81718	6.81638	120.281
													C	7.39153	5.56149	120.09
													H	7.58689	2.41297	119.579
													H	3.43798	4.9494	120.393
													H	3.1603	6.6323	120.827
													H	7.09541	8.68698	120.677
												X34	H	10.0931	8.2419	122.909
													N	9.22221	7.70819	123.161
													C	8.07873	8.43885	123.536
													O	8.14654	9.67041	123.587
													N	6.9772	7.77472	123.888
													C	6.92228	6.44203	123.863
													N	5.83064	5.85163	124.316
													C	8.03507	5.68464	123.375
													C	9.14378	6.36693	123.009
													H	10.0218	5.88443	122.603
													H	7.97565	4.61595	123.271
													H	5.75587	4.84815	124.295
													H	5.04618	6.4234	124.647
												Y34	H	1.21032	12.4593	124.52
													N	1.37629	11.4379	124.676
													C	0.563004	10.4355	125.127
													N	1.16563	9.29052	125.256
													C	2.46915	9.52688	124.878
													C	3.62533	8.70096	124.817
													O	3.72465	7.50691	125.109
													N	4.74266	9.39698	124.372
													C	4.76687	10.7254	124.053
													N	5.93046	11.2677	123.702
													N	3.70334	11.498	124.102
													C	2.60162	10.8693	124.524
													H	-0.475298	10.595	125.342
													H	5.6145	8.84396	124.251
													H	6.7703	10.701	123.6
													H	5.90813	12.2132	123.364
												Y33	H	4.3583	12.7802	120.834
													N	3.8828	11.8464	120.952
													C	4.68067	10.7225	120.881
													O	5.88913	10.775	120.701
													N	4.03204	9.53609	121.023
													C	2.68102	9.3421	121.166
													O	2.22747	8.20395	121.2
													C	1.89525	10.5557	121.269
													C	0.415298	10.4234	121.438
													C	2.54116	11.7363	121.182
													H	2.0155	12.6739	121.289
													H	0.052613	9.6532	120.762
													H	0.181795	10.1052	122.454
													H	-0.076774	11.3681	121.233
													H	4.62567	8.66775	120.905
												Y32	H	7.36188	11.1728	117.083
													N	6.44229	10.7449	117.349
													C	5.25695	11.3099	117.71
													N	4.30172	10.4527	117.925
													C	4.87847	9.22358	117.708
													C	4.3926	7.90114	117.713
													N	3.13684	7.54984	117.98
													N	5.28354	6.93178	117.426
													C	6.54217	7.23266	117.144
													N	7.09543	8.42401	117.076
													C	6.22494	9.40027	117.362
													H	5.13678	12.3704	117.804
													H	2.4591	8.27471	118.138
													H	2.84236	6.57712	117.855
													H	7.18969	6.38576	116.931
												Y31	H	9.09919	8.25202	113.594
													N	8.08459	8.47126	113.758
													C	7.43659	9.66334	113.913
													N	6.15678	9.54885	114.117
													C	5.91886	8.19573	114.12
													C	4.75981	7.40798	114.26
													N	3.53474	7.89346	114.47
													N	4.92534	6.07531	114.186
													C	6.12376	5.55218	113.966
													N	7.2626	6.18722	113.799
													C	7.1239	7.51386	113.904
													H	7.94116	10.6068	113.852
													H	3.4051	8.88904	114.413
													H	2.72951	7.26613	114.395
													H	6.15754	4.46922	113.907
												Y30	H	8.61285	4.52245	110.719
													N	7.86346	5.26445	110.7
													C	6.51854	4.86381	110.804
													O	6.25752	3.66324	110.889
													N	5.56541	5.79794	110.743
													C	5.8552	7.09395	110.639
													N	4.85763	7.95285	110.506
													C	7.21725	7.53092	110.659
													C	8.17576	6.57867	110.707
													H	9.22921	6.81594	110.735
													H	7.46301	8.57789	110.654
													H	5.04963	8.93494	110.401
													H	3.89412	7.60765	110.414
												Y29	H	5.91667	1.39007	108.058
													N	5.76096	2.42858	107.978
													C	4.44508	2.91209	108.061
													O	3.53709	2.11982	108.327
													N	4.21517	4.20346	107.814
													C	5.21239	5.0523	107.572
													N	4.92045	6.30774	107.271
													C	6.57107	4.61545	107.668
													C	6.78757	3.29839	107.877
													H	7.77807	2.87706	107.967
													H	7.38386	5.31369	107.577
													H	5.65716	6.93285	106.991
													H	3.94251	6.56887	107.099
												Y28	H	1.93909	0.356732	105.227
													N	2.43511	1.27271	105.144
													C	3.76686	1.57318	105.197
													N	4.0334	2.81326	104.914
													C	2.80792	3.39428	104.666
													C	2.43099	4.69462	104.228
													O	3.17185	5.63995	103.952
													N	1.05741	4.81134	104.059
													C	0.152686	3.80601	104.261
													N	-1.12719	4.05739	104.004
													N	0.494521	2.58781	104.626
													C	1.8077	2.43492	104.826
													H	4.50513	0.837764	105.448
													H	0.699196	5.74301	103.76
													H	-1.45797	5.00285	103.802
													H	-1.77681	3.30632	104.159
												Y27	H	-1.55135	1.71084	101.715
													N	-0.634066	2.19411	101.547
													C	-0.662759	3.51408	101.066
													O	-1.75111	4.06989	100.911
													N	0.492238	4.10283	100.749
													C	1.66154	3.49077	100.93
													N	2.75318	4.08133	100.461
													C	1.71775	2.20312	101.549
													C	0.54128	1.60443	101.848
													H	0.475584	0.633988	102.319
													H	2.66063	1.74151	101.782
													H	3.65871	3.71863	100.709
													H	2.67435	5.02705	100.073
												Y26	H	-3.82361	4.47511	97.9909
													N	-2.80013	4.25141	97.9584
													C	-2.13458	3.07962	98.1706
													N	-0.85415	3.14956	97.953
													C	-0.630514	4.45651	97.5938
													C	0.51141	5.16521	97.1703
													N	1.70932	4.61387	96.9964
													N	0.337863	6.46694	96.8667
													C	-0.862429	7.02244	96.9731
													N	-1.99722	6.4541	97.314
													C	-1.84217	5.15767	97.6156
													H	-2.63443	2.18756	98.4944
													H	1.84315	3.67604	97.3319
													H	2.50481	5.21023	96.7625
													H	-0.905065	8.08371	96.7394
												Y25	H	-4.06888	7.55969	94.4365
													N	-3.36043	6.79345	94.4332
													C	-3.46792	5.44161	94.609
													N	-2.3415	4.80854	94.4723
													C	-1.4094	5.78715	94.2101
													C	-0.011275	5.74497	93.9606
													O	0.718364	4.75266	93.8884
													N	0.517023	7.00472	93.7181
													C	-0.199254	8.16621	93.7142
													N	0.435112	9.28097	93.3248
													N	-1.4925	8.22157	93.9433
													C	-2.04187	7.02948	94.2049
													H	-4.40181	4.96389	94.8319
													H	1.54726	7.05943	93.5552
													H	1.45285	9.3227	93.4071
													H	-0.079498	10.1333	93.4697
												Y24	H	-1.74126	9.95977	90.9102
													N	-1.63637	8.92091	90.9493
													C	-2.55882	7.94382	91.1899
													N	-2.08864	6.73676	91.0739
													C	-0.755965	6.90231	90.7749
													C	0.288438	6.0091	90.4567
													N	0.133531	4.69052	90.3193
													N	1.4774	6.56043	90.1469
													C	1.63101	7.87822	90.1426
													N	0.722084	8.7976	90.3791
													C	-0.460777	8.27099	90.714
													H	-3.57806	8.16834	91.4384
													H	-0.676722	4.27808	90.7525
													H	0.972062	4.11531	90.1999
													H	2.62131	8.23392	89.8807
												Y23	H	1.77535	10.4159	87.1218
													N	1.31817	9.46878	87.1927
													C	2.09253	8.32578	86.9355
													O	3.26416	8.46298	86.5773
													N	1.52378	7.12455	87.0571
													C	0.236491	6.9802	87.3674
													N	-0.257171	5.75283	87.4345
													C	-0.564881	8.12909	87.6568
													C	0.030295	9.3414	87.5772
													H	-0.482454	10.2655	87.8017
													H	-1.5976	8.02592	87.94
													H	-1.24837	5.62095	87.5494
													H	0.321008	4.96242	87.1254
												Y22	H	4.9685	8.89692	83.4782
													N	4.01576	8.43756	83.5631
													C	3.99589	7.05899	83.6453
													O	5.0078	6.37751	83.577
													N	2.76813	6.48861	83.7724
													C	1.55829	7.12878	83.8326
													O	0.522708	6.48649	83.9698
													C	1.63133	8.57408	83.7344
													C	0.346951	9.3396	83.7005
													C	2.85025	9.14644	83.6505
													H	2.9602	10.2212	83.6499
													H	-0.296731	8.89921	82.9415
													H	-0.168897	9.25722	84.6563
													H	0.528728	10.3853	83.4744
													H	2.76181	5.42713	83.7622
												Y21	H	6.7812	5.72956	80.432
													N	5.73587	5.88501	80.4298
													C	4.91986	4.77541	80.5423
													O	5.35496	3.6362	80.581
													N	3.583	5.03324	80.5436
													C	2.97391	6.26062	80.4843
													O	1.75149	6.3477	80.5288
													C	3.87746	7.3884	80.3482
													C	3.28377	8.74792	80.1553
													C	5.20361	7.14169	80.371
													H	5.92732	7.94384	80.3346
													H	2.80307	9.08402	81.0725
													H	4.04801	9.46094	79.8645
													H	2.51242	8.68786	79.3905
													H	2.95456	4.18129	80.5396
												Y20	H	6.41148	1.60418	77.3333
													N	5.64983	2.33388	77.2996
													C	4.32584	1.90571	77.1115
													O	4.10053	0.69974	76.9897
													N	3.36044	2.82067	77.0102
													C	3.61553	4.12501	77.1084
													N	2.6161	4.97217	76.9311
													C	4.94115	4.57837	77.3975
													C	5.91158	3.64219	77.507
													H	6.93745	3.88411	77.7446
													H	5.14798	5.62476	77.5356
													H	2.78579	5.96336	76.937
													H	1.69045	4.61128	76.6727
												Y19	H	4.05021	-1.41511	74.1885
													N	3.88116	-0.373785	74.0998
													C	2.56912	0.058725	74.0863
													O	1.61855	-0.703111	74.1475
													N	2.39759	1.39987	73.9239
													C	3.37382	2.35955	73.8467
													O	3.07311	3.54034	73.7072
													C	4.73232	1.85334	73.9102
													C	5.85575	2.83277	73.7743
													C	4.90897	0.525722	74.0737
													H	5.89621	0.101799	74.1905
													H	5.60867	3.543	72.9887
													H	5.97642	3.3986	74.6974
													H	6.7849	2.31962	73.5483
													H	1.39294	1.71162	73.816
												Y18	H	0.301438	-2.49586	71.2366
													N	0.749245	-1.5536	71.1004
													C	-0.077453	-0.447177	70.8434
													O	-1.29913	-0.602019	70.8572
													N	0.495872	0.712112	70.5113
													C	1.81963	0.869246	70.5368
													N	2.32245	2.01375	70.1007
													C	2.66991	-0.204335	70.9522
													C	2.08274	-1.39224	71.2248
													H	2.63361	-2.27031	71.5304
													H	3.73251	-0.065969	71.0417
													H	3.30915	2.19457	70.1814
													H	1.685	2.77387	69.8408
												Y17	H	-3.39529	-1.16093	67.7691
													N	-2.4815	-0.655861	67.6333
													C	-2.5186	0.676444	67.1889
													O	-3.61117	1.21262	66.9951
													N	-1.36841	1.29461	66.9168
													C	-0.189609	0.70192	67.1115
													N	0.900602	1.33892	66.7216
													C	-0.128618	-0.611266	67.6784
													C	-1.30032	-1.2348	67.9413
													H	-1.35917	-2.21996	68.3822
													H	0.81696	-1.07143	67.9029
													H	1.80831	0.945664	66.9037
													H	0.815515	2.28861	66.3467
												Y16	H	-5.57831	1.62002	64.1866
													N	-4.53962	1.45953	64.0697
													C	-3.74441	2.57113	63.8591
													O	-4.18805	3.704	63.779
													N	-2.42405	2.3097	63.6488
													C	-1.79329	1.09393	63.7265
													O	-0.592395	1.00536	63.4994
													C	-2.66459	-0.024343	64.0381
													C	-2.05889	-1.39059	64.128
													C	-3.97594	0.225261	64.2345
													H	-4.65899	-0.558	64.5314
													H	-2.82467	-2.15265	64.0249
													H	-1.30087	-1.49013	63.3555
													H	-1.56566	-1.51769	65.0915
													H	-1.83902	3.15975	63.4272
												Y15	H	-5.43572	4.98592	60.8057
													N	-4.65873	4.29113	60.7001
													C	-3.36899	4.77177	60.4047
													O	-3.18602	5.99054	60.3401
													N	-2.40652	3.8887	60.1372
													C	-2.61678	2.57709	60.237
													N	-1.66162	1.75614	59.8217
													C	-3.87343	2.075	60.7028
													C	-4.85629	2.97591	60.928
													H	-5.84248	2.70386	61.2771
													H	-4.02535	1.02443	60.8742
													H	-1.73499	0.772577	60.0267
													H	-0.748344	2.15432	59.5727
												Y14	H	-3.18194	7.66725	57.0226
													N	-3.01475	6.63915	57.1023
													C	-3.86184	5.61549	57.4123
													N	-3.32389	4.43601	57.3119
													C	-2.02078	4.67362	56.9406
													C	-0.935141	3.83236	56.6192
													N	-1.00611	2.50446	56.5685
													N	0.211684	4.44173	56.2595
													C	0.279881	5.76466	56.2135
													N	-0.669721	6.64273	56.4578
													C	-1.81448	6.05285	56.8257
													H	-4.87807	5.78906	57.7123
													H	-1.81264	2.07938	56.9939
													H	-0.135634	1.97369	56.4727
													H	1.24741	6.16988	55.9304
												Y13	H	-0.016585	8.57716	53.492
													N	-0.448145	7.63911	53.646
													C	-1.73936	7.25713	53.8741
													N	-1.89236	5.9713	53.9901
													C	-0.627638	5.44804	53.8392
													C	-0.124708	4.11993	53.8434
													O	-0.748727	3.06777	54.0151
													N	1.24193	4.07696	53.611
													C	2.04143	5.16725	53.4184
													N	3.33014	4.95791	53.1487
													N	1.59461	6.40393	53.4322
													C	0.276159	6.49045	53.6376
													H	-2.54112	7.96562	53.944
													H	1.6698	3.13048	53.5511
													H	3.74692	4.03482	53.2612
													H	3.90675	5.77533	53.0585
												Y12	H	3.41141	6.84449	50.3744
													N	2.50034	6.33987	50.4108
													C	1.21435	6.79092	50.5019
													N	0.327347	5.84198	50.4846
													C	1.05511	4.67502	50.3955
													C	0.676997	3.31056	50.2976
													O	-0.460239	2.8324	50.2691
													N	1.7768	2.46687	50.1933
													C	3.08139	2.87694	50.1647
													N	4.02866	1.94135	50.0781
													N	3.44272	4.13875	50.2349
													C	2.4141	4.98623	50.359
													H	0.9792	7.83449	50.5784
													H	1.56844	1.4568	50.0623
													H	3.78775	0.968135	49.8893
													H	4.96671	2.26228	49.907
												Y11	H	5.38434	3.49023	46.97
													N	4.34844	3.60839	47.0361
													C	3.6243	4.75359	47.2234
													N	2.33962	4.56613	47.2538
													C	2.1731	3.21515	47.0611
													C	1.04475	2.37228	46.9974
													N	-0.213973	2.79241	47.1763
													N	1.28046	1.05326	46.8743
													C	2.52453	0.597726	46.7966
													N	3.64516	1.28758	46.829
													C	3.43003	2.60458	46.9357
													H	4.09984	5.70643	47.3552
													H	-0.370525	3.77675	47.0281
													H	-0.96265	2.15111	46.9107
													H	2.61897	-0.47881	46.7167
												Y10	H	5.35227	0.068853	43.5459
													N	4.58106	0.766117	43.6562
													C	4.61289	2.12383	43.8169
													N	3.43728	2.66416	43.9342
													C	2.55115	1.61439	43.8495
													C	1.1305	1.54926	43.9038
													O	0.332419	2.47583	44.048
													N	0.666313	0.242441	43.809
													C	1.45482	-0.86699	43.6797
													N	0.868968	-2.0682	43.7415
													N	2.76607	-0.81219	43.5956
													C	3.26387	0.426987	43.6832
													H	5.53267	2.67322	43.8378
													H	-0.364808	0.130819	43.7601
													H	-0.140324	-2.14078	43.6199
													H	1.43882	-2.84517	43.4479
												Y9	H	2.76862	-2.82114	40.5628
													N	2.52625	-1.78903	40.5363
													C	1.18754	-1.44135	40.5129
													O	0.289257	-2.26501	40.5489
													N	0.930497	-0.103364	40.459
													C	1.84833	0.91603	40.3624
													O	1.47289	2.07708	40.2736
													C	3.2355	0.491939	40.3976
													C	4.28708	1.54716	40.2719
													C	3.4972	-0.825847	40.5119
													H	4.51037	-1.19187	40.5913
													H	5.25412	1.10408	40.0573
													H	4.00541	2.22971	39.4728
													H	4.34999	2.13418	41.1873
													H	-0.081645	0.172946	40.3471
												Y8	H	-0.680502	-4.18833	37.3245
													N	-0.308015	-3.20541	37.2777
													C	-1.21425	-2.1488	37.0932
													O	-2.41673	-2.40739	36.9956
													N	-0.742108	-0.900651	37.031
													C	0.560747	-0.639857	37.1304
													N	0.962302	0.621595	37.053
													C	1.49415	-1.69489	37.3734
													C	1.00506	-2.95324	37.4433
													H	1.62402	-3.81717	37.6371
													H	2.54408	-1.48946	37.4852
													H	1.94717	0.820202	36.989
													H	0.29582	1.34641	36.7563
												Y7	H	-4.25801	-3.234	33.8671
													N	-3.34008	-2.73044	33.9158
													C	-2.08094	-3.21013	34.1174
													N	-1.14834	-2.30522	34.0626
													C	-1.81683	-1.13191	33.8076
													C	-1.40345	0.194314	33.5795
													N	-0.135841	0.610136	33.6412
													N	-2.37485	1.09499	33.3431
													C	-3.6471	0.723762	33.318
													N	-4.14678	-0.478959	33.5019
													C	-3.19151	-1.38949	33.7277
													H	-1.89359	-4.24684	34.3132
													H	0.573652	-0.10132	33.5891
													H	0.08065	1.55299	33.3071
													H	-4.36018	1.51935	33.1164
												Y6	H	-6.29521	-0.844433	30.3246
													N	-5.25918	-0.922497	30.4073
													C	-4.45212	-1.99194	30.6685
													N	-3.18743	-1.69449	30.7164
													C	-3.13276	-0.340143	30.4726
													C	-2.05577	0.581017	30.3842
													O	-0.852628	0.364743	30.5608
													N	-2.48675	1.86153	30.0705
													C	-3.78996	2.22925	29.8867
													N	-4.03986	3.49205	29.5471
													N	-4.80195	1.39729	30.0108
													C	-4.42693	0.143813	30.2864
													H	-4.84448	-2.97963	30.8101
													H	-1.74034	2.57019	29.9144
													H	-3.29859	4.19083	29.52
													H	-4.99904	3.74832	29.3954
												Y5	H	-6.06879	2.83048	26.849
													N	-5.30337	2.12077	26.8895
													C	-5.31239	0.777428	27.1445
													N	-4.12999	0.23814	27.1424
													C	-3.26168	1.27832	26.8899
													C	-1.84761	1.34891	26.7593
													O	-1.02338	0.438455	26.8601
													N	-1.41146	2.64113	26.4828
													C	-2.22099	3.73574	26.3553
													N	-1.64874	4.92208	26.1541
													N	-3.53082	3.67781	26.4591
													C	-3.99494	2.45429	26.7373
													H	-6.2205	0.236664	27.3245
													H	-0.391309	2.75409	26.315
													H	-0.65418	4.99753	25.9368
													H	-2.26187	5.6889	25.9374
												Y4	H	-3.80322	5.67973	23.3586
													N	-3.58177	4.64854	23.3229
													C	-2.25465	4.29181	23.1847
													O	-1.35853	5.11266	23.0583
													N	-2.00163	2.95611	23.1986
													C	-2.91825	1.94166	23.2865
													O	-2.54745	0.771644	23.2805
													C	-4.29801	2.36969	23.4041
													C	-5.35924	1.31789	23.445
													C	-4.54799	3.69294	23.4591
													H	-5.54935	4.06548	23.6179
													H	-5.18024	0.612101	22.6371
													H	-5.30538	0.764643	24.3825
													H	-6.34284	1.76436	23.3448
													H	-0.990999	2.68063	23.0313
												Y3	H	-0.519079	7.02543	19.8227
													N	-0.972218	6.08559	19.9083
													C	-2.25615	5.70698	20.1833
													N	-2.42437	4.4188	20.2208
													C	-1.17647	3.88748	19.976
													C	-0.698744	2.55202	19.8693
													O	-1.33272	1.5024	20.0019
													N	0.649141	2.50569	19.5353
													C	1.45332	3.59416	19.3552
													N	2.71113	3.38191	18.9572
													N	1.02924	4.83327	19.474
													C	-0.268096	4.92908	19.7903
													H	-3.03958	6.41979	20.3451
													H	1.06893	1.55502	19.4322
													H	3.1347	2.46055	19.0817
													H	3.30101	4.19574	18.9136
												Y2	H	2.84713	5.72318	16.3706
													N	1.95041	5.17415	16.3248
													C	2.03376	3.79926	16.0549
													O	3.14137	3.283	15.8928
													N	0.901937	3.1016	15.932
													C	-0.293685	3.66719	16.0957
													N	-1.36901	2.9402	15.8297
													C	-0.394226	5.03533	16.4962
													C	0.757094	5.73659	16.6113
													H	0.780959	6.77272	16.9153
													H	-1.34823	5.48014	16.7154
													H	-2.28566	3.30824	16.0213
													H	-1.25786	1.9599	15.5522
												Y1	H	5.29198	2.79477	13.1116
													N	4.25547	2.96261	13.0723
													C	3.53975	4.12596	13.0786
													N	2.26037	3.96116	12.9122
													C	2.08837	2.60125	12.817
													C	0.975353	1.77643	12.552
													N	-0.246248	2.2362	12.2975
													N	1.20943	0.452203	12.4766
													C	2.43445	-0.026562	12.6492
													N	3.54263	0.647496	12.8615
													C	3.33206	1.96837	12.9389
													H	4.00062	5.08477	13.2108
													H	-0.431657	3.20933	12.4699
													H	-1.01011	1.57489	12.1534
													H	2.52606	-1.1073	12.5901

## Sheet: Solvation Schemes
THE DEPENDENCE OF INTERACTION ENERGIES ON THE IMPLICIT SOLVATION SCHEMES AND GEOMETRIES
The dependence of the interaction energies on implicit solvation model used for studying environmental effects was assessed by using the Conductor-like Polarizable Continuum Model (CPCM).1, In this context, ORCA uses Gaussian charges,
together with a switching function to weight the contribution of each charge to the solvation properties.2-4 In order to infer the effect of non-electrostatic solvation effects in our results, we used the Solvation Model Based on Density (SMD).5
This model includes a term in the final energy that accounts for cavitation and changes in the dispersion energy due to the solvation process. In HFLD calculations, the solvation contribution to the correlation energy was estimated using two
different schemes: the Perturbation Theory and Energy scheme (PTE), and the more accurate Perturbation Theory and Energy scheme with Singles (PTES ).6-7 Regarding the PTE scheme, the effect of the solvent is considered through the
reference energy and the orbitals from the reference calculation, that implicitly enter the coupled-cluster (CC) iterations. On the other hand, in the PTES scheme, explicit solvation terms are added to the singles and doubles residuals to calculate
the CC excitations, together with a correction to the correlation energy, as implemented8 in a development version of the ORCA program package, based on version 5.0.
A. The Dependence of B3LYP-D3(BJ)/def2-TZVP(-f) Inter-strand Interaction energy (kcal/mol) on CPCM and SMD Methods for the SSN(BACK-C) Model in Water
					CPCM	SMD
					-107.01	-93.47
The difference in the B3LYP-D3/def2-TZVP(-f) interaction energies computed with the CPCM and SMD methods amounts to ca. 13%. As the SMD results also incorporate non-electrostatic effects, these findings demonstrate that
non-electrostatic solvation effects play a secondary role.
B. The Dependence of the London Dispersion Component of HFLD/def2-TZVP(-f) Inter-strand Interaction Energy (kcal/mol) on the Solvation Schemes for the CT×××GA Base Step in Water
The dependence of HFLD interaction energies on the specific solvation correction employed for the correlation energy was evaluated on a CT×××GA base step model. The geometry of the model system was optimized with GFN2-xTB in water.
The charged backbones were cut and the bonds cut were saturated with hydrogen atoms. No further geometry optimization was performed (See the "CT...GA-XYZ" sheet for the coordinates).
Single-point HFLD/def2-TZVP(-f) interaction energy calculations were performed at the resulting structure with the PTE and PTES solvation schemes in water. RIJCOSX approach was used in the SCF part. Matching auxiliary basis sets were used
in both SCF and correlation parts. The London dispersion component of the calculated interaction energy is as in the following table.
						LD	LD
						(CPCM)	(SMD)
					PTE	-20.9	-20.88
					PTES	-20.96	-20.94
The calculated dispersion energy is essentially identical irrespective of the specific solvation scheme employed. For this reason, the simplest PTE scheme was used in the main manuscript.
C. Geometry Dependence of the HFLD Inter-strand Interaction Energy (kcal/mol) for the CTGA Base Step In Water
The effect of the geometry on the inter-strand interaction energy calculated at the HFLD level was assessed by using the CT×××GA base step. Two charge states were considered for the phosphate groups of this base step: (i) charged and
(ii) neutralized with H atoms. Both charged and neutralized structures were optimized at RI-MP2/def2-SVP, B3LYP-D3(BJ)/def2-SVP, and GFN2-xTB levels, including the effect of water implicitly (CPCM for RI-MP2 and B3LYP-D3(BJ), and GBSA
for GFN2-xTB). Single-point HFLD/def2-TZVP(-f) interaction energy calculations in water by using CPCM/PTE scheme were performed at each geometry with the settings described above. The calculated HFLD interaction energies are as in the
following table.
					System			Geometry
						RI-MP2		B3LYP-D3(BJ)		GFN2-xTB
					Charged	-19.2		-19.9		-20.1
					Neutral	-19.4		-20.3		-20.1
The table shows that the computational methods used for geometry optimization (B3LYP-D3, RI-MP2, and GFN2-xTB) do not have noticeable effects on CPCM-HFLD interaction energies.
D. References
[1]	Barone, V.; Cossi, M. J. Phys. Chem. A 1998, 102, 1995–2001.
[2]	York, D. M; Karplus, M. J. Phys. Chem. A 1999, 103, 11060-11079.
[3]	Garcia‐Ratés, M.; Neese, F. J. Comput. Chem. 2019, 40, 1816–1828.
[4]	Garcia‐Ratés, M.; Neese, F. J. Comput. Chem. 2020, 41, 922–939.
[5]	Marenich, A. V.; Cramer, C. J.; Truhlar, D. G. J. Phys. Chem. B 2009, 113, 6378–6396.
[6]	Cammi, R. J. Chem. Phys. 2009, 131, 164104.
[7]	Caricato, M. J. Chem. Phys. 2011, 135, 074113.
[8]	Garcia-Ratés, M.; Becker, U.; Nesse, F. J. Comput. Chem. 2021, DOI: 10.1002/jcc.26726

## Sheet: LED-DNA-SS-noBackbone
HFLD/LED INTERACTION ENERGY (kcal/mol) MATRICES OF DNA FOR THE SUBSYSTEM SS WITHOUT BACKBONES
The results on SSN(BACK-C) and SSN(BACK-N) are the same with two decimal points. Therefore, we report only one set of results on the SS system without backbones.
The noticeable intra-strand stacking, inter-strand stacking (non-diagonal elements), and Watson-Crick base-pairing (diagonal elements) contributions are shown blue, red, and green, respectively.
A. ISOLATED STRANDS
Combined HFLD/LED analysis was performed on each isolated strand at the duplex geometry in gas phase. Each base was considered as a separate fragment. Therefore, the calculations on each strand involve seven fragments.
Electrostatic (Upper Triangle) and Exchange (Lower Triangle) Energy Distribution in Gas Phase
Strand X									Strand Y
X13 (C)	X14 (T)	X15 (G)	X16 (A)	X17 (G)	X18 (G)	X19 (A)			Y13 (G)	Y14 (A)	Y15 (C)	Y16 (T)	Y17 (C)	Y18 (C)	Y19 (T)
	-24.55	0.26	-0.06	0.24	0.16	-0.02	X13 (C)			-29.07	-0.01	-0.06	0.26	0.15	0.03	Y13 (G)
-6.91		-14.74	0.07	-0.19	-0.07	-0.01	X14 (T)		-10.44		-15.78	-0.04	-0.12	-0.07	-0.01	Y14 (A)
-0.01	-4.7		-27.32	0.53	-0.13	0.09	X15 (G)		-0.01	-5.05		-13.3	-0.48	-0.33	0.02	Y15 (C)
0	0	-9.06		-28.84	-0.14	-0.03	X16 (A)		0	0	-4.69		-24.98	-1.15	-0.09	Y16 (T)
0	0	-0.03	-10.1		-23.05	-0.18	X17 (G)		0	0	-0.01	-6.73		-15.31	-0.08	Y17 (C)
0	0	0	-0.02	-10.12		-31.61	X18 (G)		0	0	0	-0.01	-5.43		-16.81	Y18 (C)
0	0	0	0	-0.03	-10.7		X19 (A)		0	0	0	0	-0.01	-5.75		Y19 (T)
HFLD Dispersion Energy Distribution in Gas Phase
The dispersion energy terms of the isolated strands given below are not a part of HFLD inter-strand interaction energy.
Thesse calculations were only performed for assessing the role of intra-strand dispersion on the stability of isolated fragments.
Strand X									Strand Y
	X14 (T)	X15 (G)	X16 (A)	X17 (G)	X18 (G)	X19 (A)				Y14 (A)	Y15 (C)	Y16 (T)	Y17 (C)	Y18 (C)	Y19 (T)
	-8.49	-0.1	-0.01	0	0	0	X13 (C)			-11.6	-0.1	-0.01	0	0	0	Y13 (G)
		-5.86	-0.1	-0.01	0	0	X14 (T)				-6	-0.09	-0.01	0	0	Y14 (A)
			-11.8	-0.15	-0.02	0	X15 (G)					-5.82	-0.08	-0.01	0	Y15 (C)
				-11.5	-0.13	-0.02	X16 (A)						-8.03	-0.1	-0.01	Y16 (T)
					-11.94	-0.17	X17 (G)							-5.92	-0.08	Y17 (C)
						-13.26	X18 (G)								-6.79	Y18 (C)
	Total_X:	-63.56								Total_Y:	-44.65		Total Dispersion:			-108.21
Solvent Polarization Effect on the HFLD Dispersion Energy Distribution of the Isolated Strands
These terms were obtained by substracting the decomposed dispersion energy terms of the isolated strands given above from the corresponding CPCM-HFLD/LED values in water
It appers that solvent does not have any noticeable effect on the intra-strand dispersion energy.
Strand X									Strand Y
	X14 (T)	X15 (G)	X16 (A)	X17 (G)	X18 (G)	X19 (A)				Y14 (A)	Y15 (C)	Y16 (T)	Y17 (C)	Y18 (C)	Y19 (T)
	0.06	-0.01	0	0	0	0	X13 (C)			-0.14	-0.01	0	0	0	0	Y13 (G)
		-0.09	0	0	0	0	X14 (T)				-0.05	0	0	0	0	Y14 (A)
			0.34	0	0	0	X15 (G)					0.24	0	0	0	Y15 (C)
				0.1	0	0	X16 (A)						0.08	0	0	Y16 (T)
					0.33	0.01	X17 (G)							0.27	0	Y17 (C)
						0.29	X18 (G)								0.18	Y18 (C)
	Total_X:	1.03								Total_Y:	0.57			Total_X + Total_Y:		1.6
B. STRANDS IN DUPLEX AND IN GAS PHASE
Combined HFLD/LED analyses were performed on the duplex. Each base was taken as a separate fragment. Therefore, the calculation involves fourteen fragments.
In this section, decomposed energy terms of the duplex belonging to the interaction between pair of bases on the same strand are provided.
Electrostatic (Upper Triangle) and Exchange (Lower Triangle) Energy Distribution
Strand X									Strand Y
X13 (C)	X14 (T)	X15 (G)	X16 (A)	X17 (G)	X18 (G)	X19 (A)			Y13 (G)	Y14 (A)	Y15 (C)	Y16 (T)	Y17 (C)	Y18 (C)	Y19 (T)
	-25.03	0.54	-0.11	0.4	0.24	-0.02	X13 (C)			-28.97	0.2	-0.12	0.44	0.25	0.03	Y13 (G)
-6.93		-14.27	-0.08	-0.33	-0.13	-0.01	X14 (T)		-10.32		-13.09	-0.13	-0.05	-0.07	0	Y14 (A)
-0.01	-4.59		-26.18	0.88	-0.16	0.13	X15 (G)		-0.01	-4.86		-13.79	-0.47	-0.5	0.04	Y15 (C)
0	0	-8.85		-28.89	-0.03	-0.05	X16 (A)		0	0	-4.59		-24.85	-1.16	-0.06	Y16 (T)
0	0	-0.02	-10.04		-19.07	-0.04	X17 (G)		0	0	-0.01	-6.56		-12.58	-0.14	Y17 (C)
0	0	0	-0.02	-10.05		-31.98	X18 (G)		0	0	0	-0.01	-5.39		-17.32	Y18 (C)
0	0	0	0	-0.03	-10.6		X19 (A)		0	0	0	0	-0.01	-5.66		Y19 (T)
C. ELECTRONIC PREPARATION ENERGY DISTRIBUTION UPON DUPLEX FORMATION IN GAS PHASE
Non-diagonal elements are the difference in the intra-strand electrostatic (upper triangle) and exchange (lower triangle) energies given in A and B.
Diagonal elements (shown bold) are the changes in the intra-fragment energies upon inter-strand interaction.
Electronic Preparation Energy Distribution with Decomposed Electrostatic (Upper Triangle) and Exchange (Lower Triangle) Contributions
Strand X									Strand Y
X13 (C)	X14 (T)	X15 (G)	X16 (A)	X17 (G)	X18 (G)	X19 (A)			Y13 (G)	Y14 (A)	Y15 (C)	Y16 (T)	Y17 (C)	Y18 (C)	Y19 (T)
79.02	-0.48	0.28	-0.05	0.16	0.09	0	X13 (C)		78.34	0.11	0.2	-0.07	0.18	0.1	0	Y13 (G)
-0.02	62.2	0.47	-0.15	-0.14	-0.06	0	X14 (T)		0.12	91.1	2.69	-0.09	0.07	0	0.01	Y14 (A)
0	0.11	96.97	1.13	0.35	-0.03	0.04	X15 (G)		0	0.19	87.79	-0.49	0.01	-0.17	0.02	Y15 (C)
0	0	0.22	77.73	-0.06	0.11	-0.02	X16 (A)		0	0	0.1	62.81	0.13	0	0.03	Y16 (T)
0	0	0	0.06	90.01	3.98	0.14	X17 (G)		0	0	0	0.17	90.51	2.72	-0.06	Y17 (C)
0	0	0	0	0.07	83.8	-0.37	X18 (G)		0	0	0	0	0.04	86.81	-0.5	Y18 (C)
0	0	0	0	0	0.1	75.42	X19 (A)		0	0	0	0	0	0.09	58.24	Y19 (T)
Diagonal:	565.15		Electros.:	5.39		Exchange:	0.54		Diagonal:	555.6		Electros.:	4.89		Exchange:	0.71
Electronic Preparation Energy Distribution without Decomposing Electrostatic and Exchange Contributions
Strand X									Strand Y
X13 (C)	X14 (T)	X15 (G)	X16 (A)	X17 (G)	X18 (G)	X19 (A)			Y13 (G)	Y14 (A)	Y15 (C)	Y16 (T)	Y17 (C)	Y18 (C)	Y19 (T)
79.02	-0.5	0.28	-0.05	0.16	0.09	0	X13 (C)		78.34	0.33	0.2	-0.07	0.18	0.1	0	Y13 (G)
	62.2	0.58	-0.15	-0.14	-0.06	0	X14 (T)			91.1	2.88	-0.09	0.07	0	0.01	Y14 (A)
		96.97	1.35	0.35	-0.03	0.04	X15 (G)				87.79	-0.39	0.01	-0.17	0.02	Y15 (C)
			77.73	0	0.11	-0.02	X16 (A)					62.81	0.3	0	0.03	Y16 (T)
				90.01	4.05	0.14	X17 (G)						90.51	2.76	-0.06	Y17 (C)
					83.8	-0.36	X18 (G)							86.81	-0.41	Y18 (C)
						75.42	X19 (A)								58.24	Y19 (T)
Total_X:	570.99								Total_Y:	561.3			Total Electronic Preparation:			1132.29
D. INTER-STRAND ENERGY DISTRIBUTION IN GAS PHASE
Inter-Strand Electrostatics									Inter-Strand Exchange									Inter-Strand Dispersion									Total HFLD/LED Inter-Strand
Y13 (G)	Y14 (A)	Y15 (C)	Y16 (T)	Y17 (C)	Y18 (C)	Y19 (T)			Y13 (G)	Y14 (A)	Y15 (C)	Y16 (T)	Y17 (C)	Y18 (C)	Y19 (T)			Y13 (G)	Y14 (A)	Y15 (C)	Y16 (T)	Y17 (C)	Y18 (C)	Y19 (T)			Y13 (G)	Y14 (A)	Y15 (C)	Y16 (T)	Y17 (C)	Y18 (C)	Y19 (T)
-156.19	2.85	1.02	0.12	-0.12	-0.16	0	X13 (C)		-22.86	-0.03	0	0	0	0	0	X13 (C)		-8.48	-0.46	-0.01	-0.01	-0.01	-0.01	-0.01	X13 (C)		-187.53	2.36	1.01	0.11	-0.13	-0.17	-0.01	X13 (C)
0.04	-121.51	-1.33	-0.07	0.25	0.17	0.03	X14 (T)		-1.38	-19.8	0	0	0	0	0	X14 (T)		-3.55	-7.26	-0.16	-0.01	-0.01	-0.01	-0.01	X14 (T)		-4.89	-148.57	-1.49	-0.08	0.24	0.16	0.02	X14 (T)
-1.4	-22.45	-164.67	1.74	-1.66	-0.25	-0.1	X15 (G)		-0.05	-8.3	-23.82	0	0	0	0	X15 (G)		-0.43	-12.08	-8.43	-0.23	-0.01	-0.01	-0.01	X15 (G)		-1.88	-42.83	-196.92	1.51	-1.67	-0.26	-0.11	X15 (G)
0.44	0.01	-3.47	-121.65	3.17	0.41	0.04	X16 (A)		0	-0.05	-2.45	-19.7	-0.01	0	0	X16 (A)		-0.05	-0.42	-4.64	-7.32	-0.42	-0.01	-0.01	X16 (A)		0.39	-0.46	-10.56	-148.67	2.74	0.4	0.03	X16 (A)
-0.4	0.33	1.43	-0.99	-170.07	-6.62	0.09	X17 (G)		0	0	-0.03	-2.57	-24.96	0	0	X17 (G)		-0.01	-0.05	-0.32	-4.76	-8.81	-0.25	-0.01	X17 (G)		-0.41	0.28	1.08	-8.32	-203.84	-6.87	0.08	X17 (G)
-0.2	0.14	0.85	0.55	-5.84	-165.6	1.74	X18 (G)		0	0	0	-0.03	-1.94	-24.17	-0.01	X18 (G)		-0.01	-0.05	-0.04	-0.29	-4.63	-8.64	-0.37	X18 (G)		-0.21	0.09	0.81	0.23	-12.41	-198.41	1.36	X18 (G)
-0.02	0	-0.05	0.05	-0.84	0.32	-116.08	X19 (A)		0	0	0	0	-0.02	-1.18	-18.99	X19 (A)		-0.01	-0.05	-0.04	-0.04	-0.24	-3.11	-7.12	X19 (A)		-0.03	-0.05	-0.09	0.01	-1.1	-3.97	-142.19	X19 (A)
Total Electrostatics:		-1045.95							Total Exchange:		-172.35							Total Dispersion:		-92.92							Total Inter-Strand:		-1311.22
Total HF Interaction = Electronic Preparation + Electrostatics + Exchange =							-86.01			Total HFLD Interaction = Total HF Interaction + Dispersion =						-178.93
E. ELECTRONIC PREPARATION IN WATER
All the results in water were obtained by performing CPCM-HFLD/LED calculations.
Electronic Preparation Energy in Water with Decomposed Electrostatic (Upper Triangle) and Exchange (Lower Triangle) Contributions
Strand X									Strand Y
X13 (C)	X14 (T)	X15 (G)	X16 (A)	X17 (G)	X18 (G)	X19 (A)			Y13 (G)	Y14 (A)	Y15 (C)	Y16 (T)	Y17 (C)	Y18 (C)	Y19 (T)
81.76	0.16	0.11	-0.03	0.1	0.05	0	X13 (C)		77.61	0.22	0.17	-0.05	0.09	0.04	-0.01	Y13 (G)
0.16	62.37	0.9	-0.11	-0.06	-0.02	0	X14 (T)		0.12	91.94	1.12	-0.1	-0.01	-0.01	0	Y14 (A)
0	0.17	95.23	0.08	0.14	-0.02	0.02	X15 (G)		0	0.14	89.94	-0.93	-0.06	-0.09	0.02	Y15 (C)
0	0	0.08	77.22	0.11	0.15	-0.01	X16 (A)		0	0	0.21	64.03	0.08	-0.03	0.01	Y16 (T)
0	0	0	0.08	90.67	1.6	0.01	X17 (G)		0	0	0	0.13	93.34	1.2	-0.08	Y17 (C)
0	0	0	0	-0.07	84.18	-0.68	X18 (G)		0	0	0	0	0.09	88.81	-0.97	Y18 (C)
0	0	0	0	0	0.03	71.32	X19 (A)		0	0	0	0	0	0.23	56.04	Y19 (T)
Diagonal:	562.75		Electros.:	2.5		Exchange:	0.45		Diagonal:	561.71		Electros.:	0.61		Exchange:	0.92
Electronic Preparation Energy in Water without Decomposing Electrostatic and Exchange
Strand X									Strand Y
X13 (C)	X14 (T)	X15 (G)	X16 (A)	X17 (G)	X18 (G)	X19 (A)			Y13 (G)	Y14 (A)	Y15 (C)	Y16 (T)	Y17 (C)	Y18 (C)	Y19 (T)
81.76	0.32	0.11	-0.03	0.1	0.05	0	X13 (C)		77.61	0.34	0.17	-0.05	0.09	0.04	-0.01	Y13 (G)
	62.37	1.07	-0.11	-0.06	-0.02	0	X14 (T)			91.94	1.26	-0.1	-0.01	-0.01	0	Y14 (A)
		95.23	0.16	0.14	-0.02	0.02	X15 (G)				89.94	-0.72	-0.06	-0.09	0.02	Y15 (C)
			77.22	0.19	0.15	-0.01	X16 (A)					64.03	0.21	-0.03	0.01	Y16 (T)
				90.67	1.53	0.01	X17 (G)						93.34	1.29	-0.08	Y17 (C)
					84.18	-0.65	X18 (G)							88.81	-0.74	Y18 (C)
						71.32	X19 (A)								56.04	Y19 (T)
Total_X:	565.7								Total_Y:	563.24		Total Electronic Preparation Contribution:				1128.94
F. INTER-STRAND ENERGY DISTRIBUTION IN WATER
Inter-Strand Electrostatics									Inter-Strand Exchange									Inter-Strand Dispersion									Total HFLD/LED Inter-Strand
Y13 (G)	Y14 (A)	Y15 (C)	Y16 (T)	Y17 (C)	Y18 (C)	Y19 (T)			Y13 (G)	Y14 (A)	Y15 (C)	Y16 (T)	Y17 (C)	Y18 (C)	Y19 (T)			Y13 (G)	Y14 (A)	Y15 (C)	Y16 (T)	Y17 (C)	Y18 (C)	Y19 (T)			Y13 (G)	Y14 (A)	Y15 (C)	Y16 (T)	Y17 (C)	Y18 (C)	Y19 (T)
-163.29	3.18	1.39	0.26	-0.01	-0.13	0.03	X13 (C)		-23.39	-0.04	0	0	0	0	0	X13 (C)		-8.68	-0.47	-0.03	-0.01	0	0	0	X13 (C)		-195.36	2.67	1.36	0.25	-0.01	-0.13	0.03	X13 (C)
1.01	-122.11	-1.53	-0.05	0.35	0.25	0.07	X14 (T)		-1.41	-20.06	0	0	0	0	0	X14 (T)		-3.56	-7.35	-0.16	-0.03	-0.01	0	0	X14 (T)		-3.96	-149.52	-1.69	-0.08	0.34	0.25	0.07	X14 (T)
-0.99	-21.48	-170.6	2	-1.88	-0.34	-0.18	X15 (G)		-0.05	-8.45	-24.28	0	0	0	0	X15 (G)		-0.43	-12.14	-8.63	-0.24	-0.04	-0.01	0	X15 (G)		-1.47	-42.07	-203.51	1.76	-1.92	-0.35	-0.18	X15 (G)
0.58	-0.07	-3.08	-120.25	3.11	0.46	0.08	X16 (A)		0	-0.05	-2.57	-19.79	-0.01	0	0	X16 (A)		-0.05	-0.42	-4.74	-7.42	-0.43	-0.04	-0.01	X16 (A)		0.53	-0.54	-10.39	-147.46	2.67	0.42	0.07	X16 (A)
-0.46	0.54	2.14	0.34	-178.16	-7.69	0.13	X17 (G)		0	0	-0.03	-2.65	-25.5	0	0	X17 (G)		-0.01	-0.05	-0.32	-4.76	-8.96	-0.25	-0.04	X17 (G)		-0.47	0.49	1.79	-7.07	-212.62	-7.94	0.09	X17 (G)
-0.27	0.21	1.28	1.26	-5.25	-172.88	2.62	X18 (G)		0	0	0	-0.03	-2	-24.64	-0.01	X18 (G)		0	-0.01	-0.04	-0.29	-4.7	-8.78	-0.37	X18 (G)		-0.27	0.2	1.24	0.94	-11.95	-206.3	2.24	X18 (G)
-0.04	0.02	0.01	0.13	-1.17	0.45	-115.17	X19 (A)		0	0	0	0	-0.02	-1.27	-19.06	X19 (A)		0	0	-0.01	-0.04	-0.24	-3.19	-7.23	X19 (A)		-0.04	0.02	0	0.09	-1.43	-4.01	-141.46	X19 (A)
Total Electrostatics:		-1065.18							Total Exchange:		-175.31							Total Dispersion:		-94.19							Total Inter-Strand:		-1334.68
CPCM Dielectric:		125
Total HF = Electronic# Prep. + Electrostatic + Exchange + CPCM Dielectric =							13.45		Total HFLD = Total HF + Dispersion =				-80.74
G. SOLVENT POLARIZATION EFFECT ON THE ELECTRONIC PREPARATION
All the solvent polariztion contribution terms in this and in the following sections were obtained by substracting the corresponding decomposed interaction energy terms
in the gas phase and in water that are given above.
Solvent Polarization Contribution to the Electronic Preparation Energy with Decomposed Electrostatic (Upper Triangle) and Exchange (Lower Triangle) Contributions
Strand X									Strand Y
X13 (C)	X14 (T)	X15 (G)	X16 (A)	X17 (G)	X18 (G)	X19 (A)			Y13 (G)	Y14 (A)	Y15 (C)	Y16 (T)	Y17 (C)	Y18 (C)	Y19 (T)
2.74	0.64	-0.17	0.02	-0.06	-0.04	0	X13 (C)		-0.73	0.11	-0.03	0.02	-0.09	-0.06	-0.01	Y13 (G)
0.18	0.17	0.43	0.04	0.08	0.04	0	X14 (T)		0	0.84	-1.57	-0.01	-0.08	-0.01	-0.01	Y14 (A)
0	0.06	-1.74	-1.05	-0.21	0.01	-0.02	X15 (G)		0	-0.05	2.15	-0.44	-0.07	0.08	0	Y15 (C)
0	0	-0.14	-0.51	0.17	0.04	0.01	X16 (A)		0	0	0.11	1.22	-0.05	-0.03	-0.02	Y16 (T)
0	0	0	0.02	0.66	-2.38	-0.13	X17 (G)		0	0	0	-0.04	2.83	-1.52	-0.02	Y17 (C)
0	0	0	0	-0.14	0.38	-0.31	X18 (G)		0	0	0	0	0.05	2	-0.47	Y18 (C)
0	0	0	0	0	-0.07	-4.1	X19 (A)		0	0	0	0	0	0.14	-2.2	Y19 (T)
Diagonal:	-2.4		Electros.:	-2.89		Exchange:	-0.09		Diagonal:	6.11		Electros.:	-4.28		Exchange:	0.21
Solvent Polarization Contribution to the Electronic Preparation Energy without Decomposing Electrostatic and Exchange
Strand X									Strand Y
X13 (C)	X14 (T)	X15 (G)	X16 (A)	X17 (G)	X18 (G)	X19 (A)			Y13 (G)	Y14 (A)	Y15 (C)	Y16 (T)	Y17 (C)	Y18 (C)	Y19 (T)
2.74	0.82	-0.17	0.02	-0.06	-0.04	0	X13 (C)		-0.73	0.11	-0.03	0.02	-0.09	-0.06	-0.01	Y13 (G)
	0.17	0.49	0.04	0.08	0.04	0	X14 (T)			0.84	-1.62	-0.01	-0.08	-0.01	-0.01	Y14 (A)
		-1.74	-1.19	-0.21	0.01	-0.02	X15 (G)				2.15	-0.3	-0.07	0.08	0	Y15 (C)
			-0.51	0.19	0.04	0.01	X16 (A)					1.22	-0.09	-0.03	-0.02	Y16 (T)
				0.66	-2.52	-0.13	X17 (G)						2.83	-1.47	-0.02	Y17 (C)
					0.38	-0.38	X18 (G)							2	-0.33	Y18 (C)
						-4.1	X19 (A)								-2.2	Y19 (T)
Total_X:	-5.38								Total_Y:	2.07		Total Electronic Preparation Contribution:				-3.31					0
H. SOLVENT POLARIZATION EFFECT ON THE INTER-STRAND INTERACTION ENERGY TERMS
Inter-Strand Electrostatics									Inter-Strand Exchange									Inter-Strand Dispersion									Total HFLD/LED Inter-Strand
Y13 (G)	Y14 (A)	Y15 (C)	Y16 (T)	Y17 (C)	Y18 (C)	Y19 (T)			Y13 (G)	Y14 (A)	Y15 (C)	Y16 (T)	Y17 (C)	Y18 (C)	Y19 (T)			Y13 (G)	Y14 (A)	Y15 (C)	Y16 (T)	Y17 (C)	Y18 (C)	Y19 (T)			Y13 (G)	Y14 (A)	Y15 (C)	Y16 (T)	Y17 (C)	Y18 (C)	Y19 (T)
-7.1	0.33	0.37	0.14	0.11	0.03	0.03	X13 (C)		-0.53	-0.01	0	0	0	0	0	X13 (C)		-0.2	-0.01	-0.02	0	0.01	0.01	0.01	X13 (C)		-7.83	0.31	0.35	0.14	0.12	0.04	0.04	X13 (C)
0.97	-0.6	-0.2	0.02	0.1	0.08	0.04	X14 (T)		-0.03	-0.26	0	0	0	0	0	X14 (T)		-0.01	-0.09	0	-0.02	0	0.01	0.01	X14 (T)		0.93	-0.95	-0.2	0	0.1	0.09	0.05	X14 (T)
0.41	0.97	-5.93	0.26	-0.22	-0.09	-0.08	X15 (G)		0	-0.15	-0.46	0	0	0	0	X15 (G)		0	-0.06	-0.2	-0.01	-0.03	0	0.01	X15 (G)		0.41	0.76	-6.59	0.25	-0.25	-0.09	-0.07	X15 (G)
0.14	-0.08	0.39	1.4	-0.06	0.05	0.04	X16 (A)		0	0	-0.12	-0.09	0	0	0	X16 (A)		0	0	-0.1	-0.1	-0.01	-0.03	0	X16 (A)		0.14	-0.08	0.17	1.21	-0.07	0.02	0.04	X16 (A)
-0.06	0.21	0.71	1.33	-8.09	-1.07	0.04	X17 (G)		0	0	0	-0.08	-0.54	0	0	X17 (G)		0	0	0	0	-0.15	0	-0.03	X17 (G)		-0.06	0.21	0.71	1.25	-8.78	-1.07	0.01	X17 (G)
-0.07	0.07	0.43	0.71	0.59	-7.28	0.88	X18 (G)		0	0	0	0	-0.06	-0.47	0	X18 (G)		0.01	0.04	0	0	-0.07	-0.14	0	X18 (G)		-0.06	0.11	0.43	0.71	0.46	-7.89	0.88	X18 (G)
-0.02	0.02	0.06	0.08	-0.33	0.13	0.91	X19 (A)		0	0	0	0	0	-0.09	-0.07	X19 (A)		0.01	0.05	0.03	0	0	-0.08	-0.11	X19 (A)		-0.01	0.07	0.09	0.08	-0.33	-0.04	0.73	X19 (A)
Total Electrostatics:		-19.23							Total Exchange:		-2.96							Total Dispersion:		-1.27							Total Inter-Strand:		-23.46
Total HF Contribution = Electronic Preparation + Electrostatics + Exchange =							-25.5		Total HFLD Contribution = Total HF Contribution + Dispersion Contribution=							-26.77

## Sheet: LED-DNA-SS-withBackbone
HFLD/LED DISPERSION ENERGY (kcal/mol) MATRICES OF DNA FOR THE SUBSYSTEM SS WITH BACKBONES
Each base and each sugar-phosphate backbone (Xbb and Ybb for strand X and Y, respectively) were taken as separate fragments in HFLD calculations, resulting in total of 16 fragments.
Only the dispersion interaction between the fragments located on different strands were calculated.
Charged System SSBACK-C in Water
Y13 (G)	Y14 (A)	Y15 (C)	Y16 (T)	Y17 (C)	Y18 (C)	Y19 (T)	Ybb
-8.59	-0.57	-0.03	-0.01	0	0	0	-0.05	X13 (C)
-3.55	-7.33	-0.16	-0.03	-0.01	0	0	-0.11	X14 (T)
-0.43	-12.08	-8.63	-0.23	-0.03	-0.01	0	-1.24	X15 (G)
-0.05	-0.41	-4.74	-7.44	-0.42	-0.04	-0.01	-0.66	X16 (A)
-0.01	-0.05	-0.31	-4.73	-8.92	-0.26	-0.04	-0.98	X17 (G)
0	-0.01	-0.04	-0.29	-4.61	-8.8	-0.37	-1.24	X18 (G)
0	0	-0.01	-0.04	-0.24	-3.16	-7.16	-0.51	X19 (A)
-0.68	-0.55	-0.3	-0.28	-0.27	-0.14	-0.05	-1.54	Xbb
Neutral System SSBACK-N in Gas Phase
Y13 (G)	Y14 (A)	Y15 (C)	Y16 (T)	Y17 (C)	Y18 (C)	Y19 (T)	Ybb
-8.63	-0.45	-0.03	-0.01	0	0	0	-0.05	X13 (C)
-4.14	-7.26	-0.16	-0.03	-0.01	0	0	-0.11	X14 (T)
-0.41	-10.65	-8.63	-0.23	-0.03	-0.01	0	-0.89	X15 (G)
-0.04	-0.36	-4.08	-7.33	-0.4	-0.04	-0.01	-0.52	X16 (A)
-0.01	-0.04	-0.27	-4.63	-8.62	-0.27	-0.04	-0.87	X17 (G)
0	-0.01	-0.04	-0.29	-5.22	-8.52	-0.39	-1.26	X18 (G)
0	0	-0.01	-0.04	-0.27	-3.45	-7.14	-0.53	X19 (A)
-0.77	-0.5	-0.26	-0.26	-0.28	-0.15	-0.05	-1.24	Xbb
Neutral System SSBACK-N in Water
Y13 (G)	Y14 (A)	Y15 (C)	Y16 (T)	Y17 (C)	Y18 (C)	Y19 (T)	Ybb
-8.65	-0.45	-0.03	-0.01	0	0	0	-0.05	X13 (C)
-4.12	-7.37	-0.16	-0.03	-0.01	0	0	-0.11	X14 (T)
-0.41	-10.7	-8.77	-0.24	-0.03	-0.01	0	-0.91	X15 (G)
-0.04	-0.36	-4.21	-7.51	-0.41	-0.04	-0.01	-0.53	X16 (A)
-0.01	-0.04	-0.28	-4.67	-8.78	-0.27	-0.04	-0.89	X17 (G)
0	-0.01	-0.04	-0.29	-5.3	-8.64	-0.4	-1.29	X18 (G)
0	0	-0.01	-0.04	-0.26	-3.54	-7.3	-0.53	X19 (A)
-0.78	-0.51	-0.26	-0.25	-0.27	-0.14	-0.05	-1.24	Xbb

## Sheet: LED-DNA-LS-GasPhase
HFLD/LED INTERACTION ENERGY (kcal/mol) MATRICES FOR THE LARGE DNA SYSTEM LS WITHOUT BACKBONES IN GAS PHASE
Electrostatic Component of Electronic Preparation Energy with Diagonal Elements being Intra-Fragment Interaction Energies
StrandX																																				StrandY
X1	X2	X3	X4	X5	X6	X7	X8	X9	X10	X11	X12	X13	X14	X15	X16	X17	X18	X19	X20	X21	X22	X23	X24	X25	X26	X27	X28	X29	X30	X31	X32	X33	X34			Y1	Y2	Y3	Y4	Y5	Y6	Y7	Y8	Y9	Y10	Y11	Y12	Y13	Y14
61.8139	1.28215	0.00217703	0.0436593	0.0510087	0.0257535	0.00424731	0.00363829	-0.000556241	-0.00467514	-0.00149054	-0.000392296	0.00122663	0.000412542	-0.000465223	0.000225304	3.20005e-05	0.000228812	5.98751e-05	0.000234319	3.01895e-06	-2.42714e-05	-0.000114713	7.51072e-05	0.000339207	9.8327e-05	1.69904e-05	-2.93982e-05	5.25834e-05	9.49673e-05	-3.60561e-05	-8.189e-07	6.31839e-05	0.000136379	X1		85.793	2.37838	-0.339045	0.050683	0.027801	0.0284533	-9.43272e-06	-0.00304643	-0.00292957	-0.003082	0.000281308	-0.00262201	-0.00107659	0.000503831
	92.2406	-4.52755	-0.411948	-0.0436278	0.0805524	-0.00880555	-0.0362388	-0.00162267	-0.000777895	-0.00131333	-0.0123381	-0.00953815	-0.000131409	-0.00192677	0.000163272	-0.00324919	-0.00239439	-0.000201327	0.000260032	-0.000373074	-0.000249355	0.00100596	0.000104756	3.29392e-05	2.69929e-05	-0.000666298	0.000640449	-0.000152652	0.000158225	3.61132e-05	-1.72339e-05	-0.00010288	-0.000232167	X2			88.449	-4.71074	-0.01307	0.130491	0.148283	-0.00493098	-0.0329902	-0.0035484	-0.00386256	-0.00135727	-0.013315	-0.0100564	-0.000824832
		90.0143	2.66433	0.0654384	-0.1451	0.0475311	0.0943998	-0.00216637	-0.00775373	0.000243366	0.0123615	0.0111389	-0.00201539	0.000329655	-0.00130547	0.00462245	0.00387266	0.000261489	0.000681804	0.000559627	0.000384643	-0.00166949	-0.000446243	0.000346757	-2.6949e-05	0.000994114	-0.000728994	0.000671967	0.000232499	9.16013e-05	-1.11634e-06	0.000119053	0.000364861	X3				92.6129	1.97641	0.393153	-0.113781	0.016876	0.0846854	-0.00124355	-0.00939454	0.00274751	0.013336	0.0122692	0.00018448
			84.5581	1.46404	-0.0591819	-0.00280939	0.0782953	-0.00865882	-0.00982264	0.00572514	0.00549742	0.0060984	-0.00137836	-0.00286421	-0.00114616	0.00121897	0.00154044	-0.000396505	0.000952448	0.000191871	0.000264448	-0.000808455	-0.000120962	0.000264911	-0.000208201	0.000274389	-0.00038953	0.000424083	0.00025454	0.000147495	8.98292e-05	2.79129e-05	0.00017523	X4					62.0507	1.41085	0.40155	-0.00857014	0.0162047	0.00583116	-0.0144777	0.00250275	-0.00413743	-0.00211096	-0.00284301
				82.1367	2.41701	0.0121322	0.296687	-0.0436215	-0.0815193	0.00869801	-0.0112948	0.00722733	-0.00336437	-0.0148292	-0.0025677	-0.00120253	0.00189672	-0.0013931	0.00392103	7.3519e-06	0.000346833	-0.00140643	-3.71297e-05	0.00156668	-0.000371727	-2.87054e-05	-0.00047328	0.00109996	0.00103842	0.000317374	0.000198692	5.85548e-05	0.0004616	X5						82.6769	3.93408	-0.0109519	0.206714	-0.0153481	-0.0863897	0.0166175	-0.0111785	0.00300398	-0.00399391
					90.4724	-0.254083	0.34805	-0.0991137	-0.143231	0.0137271	-0.0445647	-0.00923495	-0.00217929	-0.0213938	-0.00255679	-0.0075873	-0.00243164	-0.00239463	0.00403338	-0.000745998	-2.91792e-06	-2.65236e-05	0.000292418	0.00142465	-0.000357396	-0.00098957	7.284e-05	0.000759328	0.00096353	0.0002529	0.000205885	-6.49755e-05	0.000221375	X6							88.781	-0.355105	0.423494	-0.00834522	-0.154178	0.032133	-0.0416688	-0.0143877	-0.00651241
						63.9509	0.904847	-0.043669	0.100002	0.0173276	0.027075	0.0112392	0.00015355	0.000355291	-0.000983696	-0.000359399	-0.000671389	-0.000770932	-0.00102718	2.07266e-05	0.000152589	-0.000113109	0.000193075	-0.00050451	-0.000320299	-0.000100691	-0.000319665	-0.000204845	-0.000261642	7.88328e-05	0.000124168	-8.84537e-06	-1.90587e-05	X7								89.0047	2.51839	-0.00657081	-0.112588	0.0271003	0.0194563	0.0170473	-0.000577473
							102.165	-0.924142	-0.597393	0.0524139	0.106429	0.0918166	-0.0054343	-0.0127021	-0.00230341	0.0121372	0.0116563	-0.000386057	0.00408443	0.00121091	0.000958966	-0.00376476	-8.23399e-05	0.00181216	-0.000217076	0.00138018	-0.00157963	0.0011418	0.000673087	0.000161146	0.00021284	0.000312966	0.000852779	X8									92.3518	-0.454327	-0.623468	0.0106391	0.143671	0.104763	0.000370546
								72.2835	0.312084	0.0194171	-0.082824	-0.0494613	0.0116416	0.0182022	0.00171261	0.00229787	-0.000330482	-4.32203e-05	-0.000532363	-0.000426526	5.19898e-05	0.000968604	-0.000200825	-0.000976525	0.000277095	0.000117925	0.000142927	2.93423e-06	-0.000272058	-0.000184495	-7.43969e-05	-0.000120323	-0.000190915	X9										55.9153	0.488756	0.0202351	0.0949454	0.0286928	0.0071765
									81.689	-0.602294	-0.154299	-0.17978	0.0536349	0.0978989	0.00744303	0.00281788	-0.0099574	0.00218167	-0.0120273	-0.00116636	-0.00077165	0.00376072	-0.000176451	-0.00406859	0.00081724	-0.000109958	0.000696664	-0.00169064	-0.00195028	-0.000639384	-0.000340427	-0.000236754	-0.00076907	X10											78.257	-0.377386	0.394591	-0.0815612	0.0154228
										56.19	-0.322295	-0.0859672	-0.00426608	-0.0225199	-0.00998887	-0.00121201	-0.00123151	0.000719704	-0.00239473	-0.000519532	-0.000575886	-0.000383024	-0.000490827	0.000289639	0.000609112	0.000148735	5.21002e-05	4.10203e-05	-0.000107634	-0.000205629	-0.000215806	5.16202e-05	0.000134163	X11												72.2867	1.23582	0.117687	-0.0529749
											89.967	2.08894	0.0309367	0.316848	-0.0194348	0.0975836	0.0403494	0.01065	-0.0143432	0.00474618	0.00140561	-0.00608466	-0.00297907	-0.00297982	0.000615705	0.00430975	-0.00187375	0.000231995	-0.00124505	-0.000128348	-0.000377325	0.000210106	0.00018649	X12													85.87	3.6228	0.0877336
												91.0979	-0.381091	0.448509	-0.0486552	0.175903	0.086562	0.00664508	-0.000706553	0.00684259	0.00308295	-0.0131892	-0.00388901	0.000503673	-6.7803e-05	0.00506467	-0.00328371	0.00228516	0.00037672	0.000365755	-0.000128852	0.000352519	0.00094797	X13														102.757	0.838168
													72.9996	0.134692	-0.184752	-0.152954	-0.0684353	-0.00513688	-0.00724527	-0.00118433	-0.00132791	0.00140698	-0.00129892	-0.000719224	-0.000433903	-0.000882657	0.00110406	-0.000221007	0.000114607	0.000401422	-0.000138361	-0.000153255	-0.000411143	X14															88.7438
														95.875	1.47215	0.318719	-0.0453408	0.0240438	-0.0942778	0.00443196	0.000561398	0.00554747	-0.00127059	-0.0134385	-0.000556167	0.00233936	0.000179289	-0.00422111	-0.00429887	-0.00022869	-0.000251781	-0.000158334	-0.00140425	X15
															79.7165	0.0847629	0.170977	0.00662786	0.0293948	0.00343557	0.00272409	0.00353487	-0.00199183	-0.00275513	-0.000266275	0.000777562	0.00105139	0.000704826	0.000254011	0.000252706	-9.36269e-05	-0.000272312	-0.000572128	X16
																88.1867	4.03056	0.184274	-0.0912658	0.0403291	0.014682	-0.0399012	-0.00463894	-0.00384375	-0.000964171	0.0123078	-0.00770623	0.000158791	-0.00194978	0.000329002	0.000315905	0.000924709	0.00115261	X17
																	86.4645	1.00629	0.324744	0.0962217	0.0287172	-0.0848697	-0.00930095	0.0123697	-0.000659407	0.0163216	-0.0106069	0.00494961	0.00193053	0.000965347	0.000639625	0.00134076	0.00253318	X18
																		79.8886	-0.172697	0.0433156	0.0276647	0.0364906	0.00146831	-0.0140243	0.000943729	0.0043394	-0.000613967	-0.000599318	-0.00178425	-0.00035152	0.000166487	-0.000213403	-0.000604653	X19
																			88.189	-0.429098	-0.0279619	-0.134349	0.00787143	0.0868799	-0.00390381	-0.00431128	-0.0024017	0.0142851	0.0137655	0.00222679	0.00113059	0.00110874	0.00360209	X20
																				75.4824	1.12997	0.130199	-0.0247169	-0.0412569	0.00743028	0.019491	-0.00554684	0.00318973	-0.00126139	-0.000753921	-0.000145981	0.000235867	0.000513392	X21
																					80.0199	-0.266987	-0.0289479	-0.0239552	0.0108176	0.0219848	-0.00767043	0.00398216	0.000806931	-0.000457608	-0.00034651	0.000728901	0.0013832	X22
																						83.821	-0.269151	-0.747849	0.0161644	-0.15923	0.0790868	-0.0376376	-0.0186479	-0.00459988	-0.00310021	-0.00467218	-0.00959538	X23
																							58.5481	-0.566635	0.0766751	-0.0232547	0.0220716	0.0122263	0.0037702	0.000702609	-0.00292156	-0.0021641	-0.00243152	X24
																								91.2961	-0.601039	0.541774	-0.216653	0.210991	0.113687	0.0215338	0.00810944	0.00253936	0.0142586	X25
																									63.5755	0.705475	-0.0823026	-0.0921354	-0.0502703	0.00386564	0.00190046	-0.00345267	-0.00644889	X26
																										94.9158	-4.77361	-0.0203307	-0.0644519	0.00969984	0.00464948	0.0156166	0.0204441	X27
																											91.0009	0.478367	0.11382	-0.0335192	0.010111	-0.0253531	-0.0338456	X28
																												103.885	5.99486	0.531951	0.124029	0.0592716	0.110858	X29
																													85.1612	0.0631578	0.298651	0.0451144	0.150818	X30
																														60.4015	0.96449	-0.105421	0.0564002	X31
																															59.3317	0.440269	-0.0352753	X32
																																83.7067	0.607719	X33
																																	82.483	X34
Exchange Component of Electronic Preparation Energy
StrandX																																				StrandY
X1	X2	X3	X4	X5	X6	X7	X8	X9	X10	X11	X12	X13	X14	X15	X16	X17	X18	X19	X20	X21	X22	X23	X24	X25	X26	X27	X28	X29	X30	X31	X32	X33	X34			Y1	Y2	Y3	Y4	Y5	Y6	Y7	Y8	Y9	Y10	Y11	Y12	Y13	Y14
	0.134487	0.000730603	-1.15857e-05	-8.43373e-07	-1.30522e-07	-1.44327e-08	-1.25502e-09	0	0	0	0	0	0	0	0	0	0	0	0	0	0	0	0	0	0	0	0	0	0	0	0	0	0	X1			0.0880218	-0.00196016	-1.58816e-05	-2.78865e-06	-3.39483e-07	-2.00803e-08	-1.25502e-09	0	0	0	0	0	0
		-0.122021	-0.00169433	-5.33032e-05	-5.9877e-06	-6.11822e-07	-4.01606e-08	-1.88253e-09	0	0	0	0	0	0	0	0	0	0	0	0	0	0	0	0	0	0	0	0	0	0	0	0	0	X2				-0.213582	0.000595442	-1.68486e-05	-1.33409e-06	-2.50376e-07	-9.41264e-09	-6.27509e-10	0	0	0	0	0
			0.11099	0.000636517	-2.28771e-05	-7.04819e-06	-3.52033e-07	-1.56877e-08	-6.27509e-10	0	0	0	0	0	0	0	0	0	0	0	0	0	0	0	0	0	0	0	0	0	0	0	0	X3					0.125757	-0.000278316	-3.56149e-05	-4.93097e-06	-2.28413e-07	-1.25502e-08	-4.39257e-09	0	0	0	0
				0.0787573	-0.000357714	-7.00181e-05	-5.62186e-06	-2.91164e-07	-1.81978e-08	-1.88253e-09	0	0	0	0	0	0	0	0	0	0	0	0	0	0	0	0	0	0	0	0	0	0	0	X4						-0.0422107	-0.000168044	-1.67796e-05	-1.72063e-06	-9.9774e-08	-4.32982e-08	-3.13755e-09	0	0	0
					0.0762532	0.000280101	-2.07718e-05	-9.45657e-07	-6.9026e-08	-7.53011e-09	-6.27509e-10	0	0	0	0	0	0	0	0	0	0	0	0	0	0	0	0	0	0	0	0	0	0	X5							0.101541	0.00202388	-2.09833e-05	-1.26882e-06	-5.14558e-07	-2.69829e-08	-1.88253e-09	0	0
						0.113082	0.000322475	-1.49705e-05	-1.77083e-06	-1.3366e-07	-1.12952e-08	-1.25502e-09	0	0	0	0	0	0	0	0	0	0	0	0	0	0	0	0	0	0	0	0	0	X6								0.189149	0.000690187	-1.96517e-05	-9.16164e-06	-4.78162e-07	-3.51405e-08	-3.13755e-09	0
							0.157878	0.00143632	-2.6437e-06	-5.44678e-07	-1.21737e-07	-1.31777e-08	-1.25502e-09	0	0	0	0	0	0	0	0	0	0	0	0	0	0	0	0	0	0	0	0	X7									0.111366	0.00011669	-4.24146e-05	-2.9951e-06	-2.27786e-07	-1.63152e-08	1.88253e-09
								0.0271937	0.0012302	-2.62619e-05	-2.59726e-06	-2.91164e-07	-3.70231e-08	-1.88253e-09	0	0	0	0	0	0	0	0	0	0	0	0	0	0	0	0	0	0	0	X8										0.103598	0.00085809	-1.29838e-05	-2.57906e-06	-1.66918e-07	-6.08684e-08
									-0.0881308	-0.00100364	-1.94923e-05	-2.73971e-06	-3.54543e-07	-2.88654e-08	-1.25502e-09	0	0	0	0	0	0	0	0	0	0	0	0	0	0	0	0	0	0	X9											-0.0428303	6.61175e-05	-6.80973e-06	-2.88968e-06	-6.30647e-07
										0.0389126	0.00159924	-1.0411e-05	-5.82643e-06	-2.36571e-07	-2.51004e-08	-3.76506e-09	6.27509e-10	0	0	0	0	0	0	0	0	0	0	0	0	0	0	0	0	X10												0.0359005	0.00334681	-1.89753e-05	-9.72828e-06
											0.152954	0.00127989	-2.39294e-05	-2.39081e-06	3.5768e-08	9.41264e-09	1.00402e-08	0	0	0	0	0	0	0	0	0	0	0	0	0	0	0	0	X11													0.228438	0.000417652	6.26129e-06
												0.0448373	0.000424373	-2.50728e-05	-1.93022e-06	-1.74448e-07	-1.25502e-08	-6.27509e-10	0	0	0	0	0	0	0	0	0	0	0	0	0	0	0	X12														0.0185656	0.00477239
													0.0631361	0.00083784	-3.65098e-05	-7.54141e-06	-2.99322e-07	-2.51004e-08	-2.51004e-09	0	0	0	0	0	0	0	0	0	0	0	0	0	0	X13															0.443068
														0.109439	0.00104824	-1.56645e-05	-6.78338e-07	-6.21234e-08	-8.15762e-09	-6.27509e-10	0	0	0	0	0	0	0	0	0	0	0	0	0	X14
															0.336652	0.00408034	3.814e-06	-3.03275e-06	-1.80095e-07	-1.88253e-08	-1.25502e-09	0	0	0	0	0	0	0	0	0	0	0	0	X15
																0.078617	0.00130061	6.80848e-07	-2.38203e-06	-1.95783e-07	-2.32179e-08	-3.13755e-09	0	0	0	0	0	0	0	0	0	0	0	X16
																	0.197431	0.00157417	7.24585e-06	-1.91202e-06	-2.20883e-07	-3.63956e-08	-1.88253e-09	0	0	0	0	0	0	0	0	0	0	X17
																		0.236946	0.00294879	1.02974e-06	-2.63554e-06	-3.54543e-07	-2.19628e-08	-1.88253e-09	0	0	0	0	0	0	0	0	0	X18
																			0.0747478	0.00120201	-1.37952e-05	-7.47991e-06	-4.59964e-07	-2.25903e-08	-3.13755e-09	-6.27509e-10	0	0	0	0	0	0	0	X19
																				0.0479206	0.000639713	-3.79355e-05	-2.22891e-06	-1.54995e-07	-2.63554e-08	-3.13755e-09	-6.27509e-10	0	0	0	0	0	0	X20
																					0.0318085	0.00108274	-1.12261e-05	-2.26217e-06	-3.77133e-07	-5.96134e-08	-1.25502e-08	6.27509e-10	0	0	0	0	0	X21
																						0.151899	0.00214113	9.13026e-07	-4.25012e-06	-4.46159e-07	-5.39658e-08	6.27509e-10	0	0	0	0	0	X22
																							-0.315922	-0.0019518	-6.37299e-05	-4.845e-06	-2.05196e-07	-4.76907e-08	-1.25502e-09	0	0	0	0	X23
																								0.0976572	-8.20249e-05	-2.00947e-05	-1.12763e-06	-2.48494e-07	-7.53011e-09	-6.27509e-10	0	0	0	X24
																									-0.018135	-3.91986e-05	-4.53878e-06	-3.69227e-06	-9.41264e-08	-1.31777e-08	-6.27509e-10	0	0	X25
																										0.156546	0.00105135	-2.50985e-05	-1.37927e-06	-2.06451e-07	-6.9026e-09	-6.27509e-10	0	X26
																											0.0839725	-0.00185796	-1.5512e-05	-3.14884e-06	-8.28313e-08	-5.64759e-09	-1.25502e-09	X27
																												0.00387577	0.000723704	-1.26493e-05	-4.7377e-07	-5.96134e-08	-7.53011e-09	X28
																													0.314489	0.00121124	-1.87374e-05	-4.10391e-06	-4.75652e-07	X29
																														-0.260123	-0.00228738	-6.66076e-05	-6.03162e-06	X30
																															-0.0208243	0.000293213	-1.4877e-05	X31
																																0.21847	0.000772489	X32
																																	0.00882786	X33
																																		X34
Total Electronic Preparation Energy
StrandX																																				StrandY
X1	X2	X3	X4	X5	X6	X7	X8	X9	X10	X11	X12	X13	X14	X15	X16	X17	X18	X19	X20	X21	X22	X23	X24	X25	X26	X27	X28	X29	X30	X31	X32	X33	X34			Y1	Y2	Y3	Y4	Y5	Y6	Y7	Y8	Y9	Y10	Y11	Y12	Y13	Y14
61.8139	1.41664	0.00290764	0.0436477	0.0510079	0.0257534	0.0042473	0.00363829	-0.000556241	-0.00467514	-0.00149054	-0.000392296	0.00122663	0.000412542	-0.000465223	0.000225304	3.20005e-05	0.000228812	5.98751e-05	0.000234319	3.01895e-06	-2.42714e-05	-0.000114713	7.51072e-05	0.000339207	9.8327e-05	1.69904e-05	-2.93982e-05	5.25834e-05	9.49673e-05	-3.60561e-05	-8.189e-07	6.31839e-05	0.000136379	X1		85.793	2.4664	-0.341006	0.0506671	0.0277982	0.028453	-9.4528e-06	-0.00304643	-0.00292957	-0.003082	0.000281308	-0.00262201	-0.00107659	0.000503831
	92.2406	-4.64957	-0.413643	-0.0436811	0.0805464	-0.00880616	-0.0362388	-0.00162267	-0.000777895	-0.00131333	-0.0123381	-0.00953815	-0.000131409	-0.00192677	0.000163272	-0.00324919	-0.00239439	-0.000201327	0.000260032	-0.000373074	-0.000249355	0.00100596	0.000104756	3.29392e-05	2.69929e-05	-0.000666298	0.000640449	-0.000152652	0.000158225	3.61132e-05	-1.72339e-05	-0.00010288	-0.000232167	X2			88.449	-4.92432	-0.0124745	0.130474	0.148282	-0.00493123	-0.0329902	-0.0035484	-0.00386256	-0.00135727	-0.013315	-0.0100564	-0.000824832
		90.0143	2.77532	0.0660749	-0.145123	0.0475241	0.0943995	-0.00216639	-0.00775373	0.000243366	0.0123615	0.0111389	-0.00201539	0.000329655	-0.00130547	0.00462245	0.00387266	0.000261489	0.000681804	0.000559627	0.000384643	-0.00166949	-0.000446243	0.000346757	-2.6949e-05	0.000994114	-0.000728994	0.000671967	0.000232499	9.16013e-05	-1.11634e-06	0.000119053	0.000364861	X3				92.6129	2.10217	0.392875	-0.113817	0.0168711	0.0846851	-0.00124356	-0.00939454	0.00274751	0.013336	0.0122692	0.00018448
			84.5581	1.54279	-0.0595396	-0.00287941	0.0782896	-0.00865911	-0.00982266	0.00572513	0.00549742	0.0060984	-0.00137836	-0.00286421	-0.00114616	0.00121897	0.00154044	-0.000396505	0.000952448	0.000191871	0.000264448	-0.000808455	-0.000120962	0.000264911	-0.000208201	0.000274389	-0.00038953	0.000424083	0.00025454	0.000147495	8.98292e-05	2.79129e-05	0.00017523	X4					62.0507	1.36864	0.401382	-0.00858692	0.016203	0.00583106	-0.0144777	0.00250275	-0.00413743	-0.00211096	-0.00284301
				82.1367	2.49326	0.0124123	0.296666	-0.0436224	-0.0815194	0.008698	-0.0112948	0.00722733	-0.00336437	-0.0148292	-0.0025677	-0.00120253	0.00189672	-0.0013931	0.00392103	7.3519e-06	0.000346833	-0.00140643	-3.71297e-05	0.00156668	-0.000371727	-2.87054e-05	-0.00047328	0.00109996	0.00103842	0.000317374	0.000198692	5.85548e-05	0.0004616	X5						82.6769	4.03562	-0.00892798	0.206693	-0.0153493	-0.0863902	0.0166174	-0.0111785	0.00300398	-0.00399391
					90.4724	-0.141001	0.348372	-0.0991287	-0.143233	0.0137269	-0.0445647	-0.00923495	-0.00217929	-0.0213938	-0.00255679	-0.0075873	-0.00243164	-0.00239463	0.00403338	-0.000745998	-2.91792e-06	-2.65236e-05	0.000292418	0.00142465	-0.000357396	-0.00098957	7.284e-05	0.000759328	0.00096353	0.0002529	0.000205885	-6.49755e-05	0.000221375	X6							88.781	-0.165955	0.424184	-0.00836487	-0.154188	0.0321325	-0.0416689	-0.0143877	-0.00651241
						63.9509	1.06272	-0.0422327	0.0999999	0.0173271	0.0270749	0.0112392	0.000153548	0.000355291	-0.000983696	-0.000359399	-0.000671389	-0.000770932	-0.00102718	2.07266e-05	0.000152589	-0.000113109	0.000193075	-0.00050451	-0.000320299	-0.000100691	-0.000319665	-0.000204845	-0.000261642	7.88328e-05	0.000124168	-8.84537e-06	-1.90587e-05	X7								89.0047	2.62976	-0.00645412	-0.11263	0.0270973	0.0194561	0.0170473	-0.000577471
							102.165	-0.896949	-0.596162	0.0523876	0.106427	0.0918164	-0.00543433	-0.0127021	-0.00230341	0.0121372	0.0116563	-0.000386057	0.00408443	0.00121091	0.000958966	-0.00376476	-8.23399e-05	0.00181216	-0.000217076	0.00138018	-0.00157963	0.0011418	0.000673087	0.000161146	0.00021284	0.000312966	0.000852779	X8									92.3518	-0.350729	-0.62261	0.0106261	0.143669	0.104762	0.000370485
								72.2835	0.223954	0.0184134	-0.0828435	-0.0494641	0.0116413	0.0182022	0.00171261	0.00229787	-0.000330482	-4.32203e-05	-0.000532363	-0.000426526	5.19898e-05	0.000968604	-0.000200825	-0.000976525	0.000277095	0.000117925	0.000142927	2.93423e-06	-0.000272058	-0.000184495	-7.43969e-05	-0.000120323	-0.000190915	X9										55.9153	0.445925	0.0203012	0.0949386	0.0286899	0.00717586
									81.689	-0.563382	-0.1527	-0.17979	0.053629	0.0978986	0.00744301	0.00281787	-0.0099574	0.00218167	-0.0120273	-0.00116636	-0.00077165	0.00376072	-0.000176451	-0.00406859	0.00081724	-0.000109958	0.000696664	-0.00169064	-0.00195028	-0.000639384	-0.000340427	-0.000236754	-0.00076907	X10											78.257	-0.341485	0.397938	-0.0815802	0.0154131
										56.19	-0.169341	-0.0846873	-0.00429001	-0.0225223	-0.00998884	-0.001212	-0.0012315	0.000719704	-0.00239473	-0.000519532	-0.000575886	-0.000383024	-0.000490827	0.000289639	0.000609112	0.000148735	5.21002e-05	4.10203e-05	-0.000107634	-0.000205629	-0.000215806	5.16202e-05	0.000134163	X11												72.2867	1.46426	0.118105	-0.0529687
											89.967	2.13378	0.0313611	0.316823	-0.0194367	0.0975834	0.0403494	0.01065	-0.0143432	0.00474618	0.00140561	-0.00608466	-0.00297907	-0.00297982	0.000615705	0.00430975	-0.00187375	0.000231995	-0.00124505	-0.000128348	-0.000377325	0.000210106	0.00018649	X12													85.87	3.64137	0.092506
												91.0979	-0.317955	0.449347	-0.0486917	0.175896	0.0865617	0.00664505	-0.000706556	0.00684259	0.00308295	-0.0131892	-0.00388901	0.000503673	-6.7803e-05	0.00506467	-0.00328371	0.00228516	0.00037672	0.000365755	-0.000128852	0.000352519	0.00094797	X13														102.757	1.28124
													72.9996	0.244131	-0.183704	-0.15297	-0.068436	-0.00513694	-0.00724527	-0.00118433	-0.00132791	0.00140698	-0.00129892	-0.000719224	-0.000433903	-0.000882657	0.00110406	-0.000221007	0.000114607	0.000401422	-0.000138361	-0.000153255	-0.000411143	X14															88.7438
														95.875	1.8088	0.322799	-0.045337	0.0240407	-0.094278	0.00443194	0.000561397	0.00554747	-0.00127059	-0.0134385	-0.000556167	0.00233936	0.000179289	-0.00422111	-0.00429887	-0.00022869	-0.000251781	-0.000158334	-0.00140425	X15
															79.7165	0.16338	0.172278	0.00662854	0.0293924	0.00343537	0.00272407	0.00353487	-0.00199183	-0.00275513	-0.000266275	0.000777562	0.00105139	0.000704826	0.000254011	0.000252706	-9.36269e-05	-0.000272312	-0.000572128	X16
																88.1867	4.228	0.185849	-0.0912585	0.0403272	0.0146818	-0.0399012	-0.00463894	-0.00384375	-0.000964171	0.0123078	-0.00770623	0.000158791	-0.00194978	0.000329002	0.000315905	0.000924709	0.00115261	X17
																	86.4645	1.24324	0.327692	0.0962227	0.0287145	-0.0848701	-0.00930097	0.0123697	-0.000659407	0.0163216	-0.0106069	0.00494961	0.00193053	0.000965347	0.000639625	0.00134076	0.00253318	X18
																		79.8886	-0.0979493	0.0445176	0.0276509	0.0364832	0.00146785	-0.0140243	0.000943726	0.00433939	-0.000613967	-0.000599318	-0.00178425	-0.00035152	0.000166487	-0.000213403	-0.000604653	X19
																			88.189	-0.381177	-0.0273222	-0.134387	0.0078692	0.0868797	-0.00390384	-0.00431129	-0.0024017	0.0142851	0.0137655	0.00222679	0.00113059	0.00110874	0.00360209	X20
																				75.4824	1.16177	0.131281	-0.0247281	-0.0412592	0.0074299	0.0194909	-0.00554685	0.00318973	-0.00126139	-0.000753921	-0.000145981	0.000235867	0.000513392	X21
																					80.0199	-0.115088	-0.0268068	-0.0239543	0.0108134	0.0219844	-0.00767049	0.00398216	0.000806931	-0.000457608	-0.00034651	0.000728901	0.0013832	X22
																						83.821	-0.585074	-0.749801	0.0161007	-0.159235	0.0790866	-0.0376376	-0.0186479	-0.00459988	-0.00310021	-0.00467218	-0.00959538	X23
																							58.5481	-0.468978	0.0765931	-0.0232748	0.0220705	0.0122261	0.00377019	0.000702608	-0.00292156	-0.0021641	-0.00243152	X24
																								91.2961	-0.619174	0.541735	-0.216657	0.210987	0.113687	0.0215338	0.00810944	0.00253936	0.0142586	X25
																									63.5755	0.862021	-0.0812512	-0.0921605	-0.0502717	0.00386544	0.00190045	-0.00345267	-0.00644889	X26
																										94.9158	-4.68964	-0.0221887	-0.0644674	0.0096967	0.0046494	0.0156166	0.0204441	X27
																											91.0009	0.482242	0.114543	-0.0335318	0.0101105	-0.0253532	-0.0338456	X28
																												103.885	6.30935	0.533163	0.12401	0.0592675	0.110858	X29
																													85.1612	-0.196965	0.296363	0.0450478	0.150812	X30
																														60.4015	0.943666	-0.105127	0.0563853	X31
																															59.3317	0.658739	-0.0345028	X32
																																83.7067	0.616547	X33
																																	82.483	X34
Electrostatic Component of Inter-Strand Interaction Energy
Y1	Y2	Y3	Y4	Y5	Y6	Y7	Y8	Y9	Y10	Y11	Y12	Y13	Y14	Y15	Y16	Y17	Y18	Y19	Y20	Y21	Y22	Y23	Y24	Y25	Y26	Y27	Y28	Y29	Y30	Y31	Y32	Y33	Y34
-125.012	-0.937366	-0.123605	-0.0466746	-0.122127	-0.0374446	0.0074809	-0.0226418	-0.0011905	0.0146554	-0.003616	-0.00204975	-0.0052641	0.000835267	0.00447133	0.00124013	-0.000232854	-0.00170533	0.000140875	-0.0020367	-0.000614051	-0.000609857	0.000798221	0.000219274	-0.00098456	0.000228396	2.58415e-05	0.000460671	-0.000602608	-0.000593219	-0.000104392	-7.75068e-05	-0.000136485	-0.00040144	X1
-12.6879	-169.735	6.58909	-0.0711449	0.474245	-0.063322	0.0173101	0.130926	0.0204113	-0.0225036	0.00443392	0.0264955	0.0250987	-0.00423171	-0.00677019	-0.0047673	0.00721023	0.00790115	0.00125363	0.00260447	0.00180209	0.000917077	-0.0042041	-0.00099761	0.00104157	-0.000356593	0.00137853	-0.00216347	0.00174853	0.000824871	5.55296e-05	-7.907e-05	-7.22565e-05	0.000985106	X2
-0.492616	7.34537	-172.445	-1.1025	-1.65262	-0.209788	-0.000983145	-0.156711	0.00141432	0.0753826	-0.0168262	-0.0124309	-0.0247823	0.00506771	0.0175701	0.00559927	-0.000554248	-0.00578362	0.000917965	-0.00645951	-0.00197155	-0.00191248	0.00330088	0.00109564	-0.00289682	0.000812272	0.000230053	0.00149309	-0.00196008	-0.00174933	-0.000268713	-0.000191672	-0.000330575	-0.00128152	X3
0.0226385	-0.354633	-12.3537	-125.334	-3.17572	-0.343491	-0.00069828	-0.0495285	0.0152494	0.0300972	-0.00503227	0.0057005	-0.000915118	0.000967282	0.00535958	0.00108032	0.00259055	0.00059785	0.000903682	-0.001361	-7.05835e-05	-0.000387382	2.33471e-05	0.000192142	-0.000656739	0.000215386	0.000556925	-0.000120856	-0.000197841	-0.0003494	-6.61778e-05	-8.06732e-05	-0.000122856	-0.000183635	X4
-0.0384627	-1.13884	1.48526	0.385304	-160.515	-6.55377	0.289713	0.126309	0.128973	0.167679	-0.0364834	0.0738183	0.0244077	-0.00108295	0.0228141	-0.000541714	0.0180698	0.00804387	0.00482051	-0.00615866	0.000526703	-0.00146661	-0.00303825	-5.595e-05	-0.0027953	0.000722434	0.00316591	-0.00173044	0.00011115	-0.001241	-0.00030645	-0.000433192	-0.000628935	-0.000255183	X5
0.0080273	-0.372979	1.04178	-1.48105	-5.90274	-168.343	2.98194	0.9927	0.209545	0.113992	-0.0339393	0.146773	0.080045	-0.00726456	0.0093727	-0.00562961	0.0274658	0.0182592	0.00559352	-0.000189574	0.00295602	0.000340869	-0.00631632	-0.000671104	-0.000334931	0.00022979	0.00380784	-0.0033349	0.00169133	0.000116653	-8.77007e-05	-0.000297409	-0.000382409	0.000649528	X6
0.0120343	0.112048	-0.00142651	0.097791	0.442339	-0.638792	-120.337	-1.35943	-0.0696157	-0.155091	0.0442234	-0.0559965	-0.0072834	0.00112302	-0.0223533	-0.000109266	-0.00809823	-0.00120631	-0.00233977	0.00599366	0.000531949	0.00147674	0.000915133	-4.0763e-06	0.00236489	-0.000503104	-0.00131906	0.000365537	0.000401119	0.00104487	0.000223517	0.000255379	0.000385524	0.000367886	X7
-0.0209435	-0.000854155	-0.177142	0.0388288	-0.655265	-1.82624	-19.905	-175.127	1.46505	2.23466	-0.170196	-0.0351549	-0.148226	0.0313886	0.0823225	0.020342	-0.00924717	-0.0230305	0.00134815	-0.0177259	-0.0052754	-0.00458405	0.00808715	0.0021731	-0.00608738	0.00148195	-0.000505366	0.00334216	-0.00370094	-0.0030761	-0.000454263	-0.000276934	-0.000506661	-0.00206878	X8
0.00345434	0.0274762	-0.0246095	0.03457	0.101907	0.31999	-0.154348	0.0719943	-114.152	-2.63273	0.11843	0.0983998	0.079604	0.00667115	-0.0235711	0.0069548	0.00113663	0.00460454	0.000186121	0.00795923	0.00142308	0.00155951	0.00182993	0.000916929	0.00234551	-8.24171e-05	-0.000431168	0.000310089	3.34739e-05	0.00080018	0.000227069	0.000232159	0.000339685	2.80741e-05	X9
0.0071813	0.0687809	-0.059893	0.070058	0.142485	0.44648	-0.198976	-1.66922	0.293613	-156.668	3.6653	-1.4501	-0.12908	-0.0212655	-0.193204	0.0221502	-0.065159	-0.0133066	-0.0112471	0.0318402	0.00155799	0.00556143	0.00906538	0.00169634	0.00873208	-0.00124526	-0.00552771	0.00316382	-0.000168842	0.00304396	0.000799478	0.000945227	0.00133966	0.000292817	X10
-0.00338299	-0.00284784	-0.0177218	-0.00577027	-0.0587903	-0.0782253	0.0414581	-0.229644	-0.420522	1.26249	-111.945	1.58055	0.154786	0.0480903	0.0897291	0.0359128	0.005185	-0.0136605	0.00298711	-0.00986975	-0.00192795	-0.00225895	0.00556042	0.00213151	-0.0032624	0.00115172	0.000657228	0.00152625	-0.00209656	-0.00163441	-0.000200644	-0.000131753	-0.000257014	-0.00115883	X11
-0.00428088	0.0188802	-0.0473893	0.0164745	-0.0384932	0.0180107	-0.00516578	-0.443368	-0.417545	1.36116	-3.4827	-164.95	-6.28063	0.177786	0.0775984	0.125858	-0.182062	-0.127425	-0.0123094	-0.0228222	-0.013304	-0.00587248	0.0267496	0.00546	-0.00634243	0.00167011	-0.0056031	0.00858072	-0.00667245	-0.00326265	-0.000245536	0.00017688	5.02579e-05	-0.0029597	X12
-0.00497066	-0.00175515	-0.0247413	-1.27215e-05	-0.0562256	-0.0553086	0.00616688	-0.110863	0.029314	0.915605	-0.694087	-7.50258	-167.549	2.77216	0.884009	0.139897	-0.196275	-0.178534	0.0136887	-0.0763773	-0.0191295	-0.0140823	0.029568	0.00801129	-0.0157499	0.00394444	-0.000256517	0.0072163	-0.00809047	-0.00637772	-0.000839731	-0.000509613	-0.000903658	-0.00391119	X13
0.000378792	-0.00745961	0.0110753	-0.00463624	0.00442415	-0.00437255	0.0084408	0.0525324	0.0425771	0.0231939	0.107919	0.0363508	-12.7874	-118.943	-1.35832	-0.0526746	0.291505	0.174227	0.0196179	0.00969508	0.00979367	0.00135846	-0.0222649	-0.00411096	0.00140033	-0.000582986	0.0048382	-0.00589701	0.00386048	0.000959408	-0.00010277	-0.000363687	-0.00038998	0.00145832	X14
0.00202194	0.0131421	-0.00335704	0.0104986	0.0342035	0.060943	-0.00347879	-0.0479152	-0.0590803	-0.0788964	0.222876	-0.399348	-2.144	-23.0395	-160.412	1.99002	-1.54412	-0.183089	-0.104742	0.192517	-0.00465244	0.0205872	0.0179802	-0.00530279	0.0235604	-0.00650637	-0.0183983	0.00715294	0.00196848	0.00704809	0.00136636	0.0016466	0.00226527	0.00200265	X15
0.0004022	-0.00252144	0.00527081	-0.00201017	0.00341664	-0.000530219	0.00285093	0.0187635	0.00772398	0.00354725	0.0167714	0.188911	0.481282	0.0583699	-4.87371	-121.606	2.93213	0.340266	0.0212	0.00433079	0.0214047	0.00997047	-0.0262545	-0.00330268	0.00571487	-0.000810666	0.00503511	-0.00592557	0.00404744	0.00188955	0.000125474	-9.21811e-05	-2.71793e-05	0.00154449	X16
-0.0011388	0.00638186	-0.0115649	0.005567	-3.82511e-05	0.0163134	0.00244321	-0.0468666	-0.0225894	0.058359	0.00264725	-0.127454	-0.354689	0.325898	1.58679	-1.82756	-164.779	-6.31769	0.117637	-0.161182	-0.100907	-0.0379109	0.139195	0.0129442	-0.0234054	0.000899135	-0.0276989	0.0264507	-0.0155024	-0.00605428	-0.000394787	0.000629289	0.000396651	-0.00475504	X17
-0.00159364	0.00117657	-0.00792866	0.00170468	-0.00709671	0.00110975	0.00429738	-0.02513	-0.00691813	0.0580419	-0.0142012	-0.0328609	-0.138994	0.125238	0.794319	0.368667	-8.28327	-162.589	1.46108	-1.44271	-0.121541	-0.102284	0.200653	0.0307273	-0.0738657	0.00959223	-0.0160695	0.0265141	-0.0222371	-0.0155433	-0.0020207	-0.000911484	-0.00179269	-0.00732621	X18
0.000325671	0.0021971	-0.000912863	0.00149492	0.00373393	0.00619524	-0.00115028	-0.0048033	-0.00447891	-0.00969279	0.00782529	-0.0179685	-0.00888637	0.00669511	-0.0646552	0.0238863	-0.940666	-2.75364	-124.625	3.30394	0.0227752	0.0477381	-0.00223043	-0.00441513	0.0394311	-0.00474134	-0.0148751	0.00655501	0.00149977	0.00607002	0.00129619	0.00128892	0.00162541	0.000851685	X19
-0.0011195	-0.00587715	0.00183166	-0.00339778	-0.00808987	-0.0114555	0.00494751	0.00785391	0.00912879	0.0340147	-0.0108848	0.0523017	0.0464698	-0.00287115	0.174447	-0.0272279	0.903894	1.57719	-0.484587	-168.715	1.10374	-0.025873	-0.161998	0.0826942	-0.152908	0.0342904	0.0748551	-0.0301026	-0.00628344	-0.0252714	-0.00513698	-0.0051056	-0.00649397	-0.00386546	X20
-0.000209944	0.000990762	-0.00194778	0.000656767	-0.00088373	0.000835558	3.76355e-05	-0.00491235	-0.00205854	0.0037373	-0.00159705	-0.0108019	-0.0208658	0.00666847	0.0229311	0.035296	-0.0605083	-0.27165	-0.55658	-0.00898086	-122.132	-0.849429	0.43832	0.0423567	0.0180357	0.00388132	-0.0246884	0.0303679	-0.0168177	-0.00410775	0.000487192	0.0010084	0.000608095	-0.00411563	X21
-0.000302172	-3.42495e-05	-0.00112674	8.29881e-05	-0.00142943	-0.000537999	0.000581971	-0.00237919	-0.00038814	0.00568088	-0.00203599	-0.00232471	-0.00923635	0.00384736	0.0217249	0.0120055	-0.0124537	-0.0574274	0.0319326	-0.533222	-4.87932	-127.159	3.40488	0.113475	-0.125237	0.00630293	-0.026724	0.0379707	-0.0260338	-0.0149941	-0.001284	-0.000468216	-0.00113809	-0.00572733	X22
0.000767746	-0.000559159	0.00387002	-0.000498345	0.00461925	0.00226767	-0.000696009	0.00734645	0.00122063	-0.0118211	0.00656112	0.0120191	0.0319008	-0.00733395	-0.0599374	-0.0427053	-0.0073876	0.153912	-0.0230579	1.05509	0.684193	2.05879	-166.366	-3.57123	2.45115	-0.0950089	0.108196	-0.141834	0.129498	0.0848461	0.00910641	0.00433428	0.00733055	0.0247904	X23
4.97615e-06	-0.00136798	0.00135585	-0.000862492	-0.000916676	-0.002547	0.000284518	0.00368425	0.00220573	0.000846197	-0.000629826	0.00825547	0.0102027	-0.00296165	0.00131323	-0.00936702	0.0416466	0.0740473	0.0616161	0.0547226	0.046745	-0.56282	-1.06206	-117.609	1.47993	0.111964	0.193507	-0.0949946	0.0395744	-0.000416243	-0.000653805	-0.00311789	-0.00262096	0.00344998	X24
-0.000332626	-0.00272978	0.0013347	-0.00162116	-0.00351049	-0.00570264	0.00108047	0.00438814	0.00363303	0.00630614	-0.00308713	0.0118724	0.00912649	-0.00335695	0.0190224	-0.00287883	0.0652676	0.0662303	0.0665234	-0.0904403	0.0869074	-0.214791	-1.76272	0.361284	-172.96	3.06645	0.918291	-0.375051	-0.0861127	-0.163065	-0.0204263	-0.0191469	-0.0223327	-0.0121854	X25
0.000216393	9.83935e-05	0.000854137	2.88585e-05	0.00157298	0.00128806	-0.000172091	0.00105631	-0.000226181	-0.00274892	0.00167813	0.0012262	0.00479804	-0.000957964	-0.0102131	-0.00516586	-0.00669218	0.00547413	-0.0100602	0.0507712	0.0409285	0.107717	-0.127206	-0.412011	-0.749373	-122.41	-0.975995	-0.0267615	0.211315	0.16592	0.0136348	0.00897634	0.00920783	0.0260517	X26
-0.000319815	0.00147878	-0.00262209	0.00101247	-0.000392161	0.0020947	0.000158798	-0.00549158	-0.00226302	0.00315804	-0.000889899	-0.00832036	-0.0131116	0.00365952	0.0100552	0.0101978	-0.0274806	-0.0512696	-0.0170188	-0.0722591	-0.0667852	-0.0721246	0.494238	0.345786	-2.32701	-17.3422	-166.379	10.9144	-1.61985	-0.296425	0.0333952	0.0253464	0.000904311	-0.0776491	X27
0.000453388	-2.93317e-05	0.00185738	-0.000112091	0.00246306	0.0013631	-0.000499048	0.00287804	0.000257153	-0.00521114	0.00242809	0.00299646	0.00882634	-0.00184773	-0.01588	-0.00900871	-0.000654379	0.0214958	-0.00244026	0.0667806	0.0388697	0.0728069	-0.158218	-0.0812456	1.15002	-0.396881	10.7977	-176.947	4.21468	1.02055	-0.013295	-2.00245e-05	0.0581413	0.13404	X28
-0.000461174	-0.000854873	-0.000756463	-0.000336048	-0.001991	-0.00146076	0.000909859	-0.00107506	0.00035809	0.00542676	-0.00176146	0.00108291	-0.00277158	0.000581165	0.0113199	0.00299986	0.00469633	-0.00649935	0.00633216	-0.0489281	-0.0167604	-0.0348057	-0.00190664	0.0058031	-0.381795	0.355937	1.16816	-23.0956	-170.351	-8.1411	-0.392152	-0.101513	-0.138492	-0.177963	X29
-0.000296647	-0.00146076	0.000390089	-0.000759473	-0.00183797	-0.0024114	0.0007522	0.00121513	0.00126942	0.00381291	-0.00137979	0.00392694	0.00183157	-0.000645699	0.00725286	-0.000110937	0.012652	0.00819189	0.0101189	-0.0257845	-0.00149957	-0.0176642	-0.0540842	-0.0187799	-0.197949	0.130493	0.918752	-1.45494	-10.5977	-163.541	-2.68303	-0.516795	-0.155766	-0.0409618	X30
-0.000122898	5.80566e-05	-0.000582933	2.80949e-05	-0.000818665	-0.00055845	7.25771e-05	-0.000741252	-2.45155e-05	0.00122353	-0.000701211	-0.000827206	-0.00226224	0.000439137	0.0037197	0.00216073	0.00106016	-0.00350305	0.000773209	-0.0112897	-0.00560531	-0.00880017	0.0168274	0.00864635	-0.0732652	0.0310661	0.116558	0.221421	-1.86229	-1.1709	-120.808	-0.814799	-0.00752424	-0.119465	X31
-0.000130538	-0.000423703	-7.63874e-05	-0.000228304	-0.00086921	-0.000982059	0.000221299	0.000160393	0.000386629	0.00142469	-0.00065173	0.000819805	-0.000237165	-2.9289e-05	0.00301873	0.000635993	0.00386344	0.00133415	0.00275118	-0.00901447	-0.00214927	-0.00572435	-0.00369081	0.000284898	-0.0453049	0.0139505	0.1126	0.0038457	-0.35326	-1.30725	-4.49949	-117.456	1.36965	0.158681	X32
-4.51838e-05	-7.46542e-05	-0.000131036	-4.84412e-05	-0.000399051	-0.000413875	2.93103e-05	-4.53526e-05	0.000126422	0.000460126	-0.000295709	4.10467e-05	-0.000436747	6.86558e-05	0.00129623	0.000522809	0.0013348	0.000189094	0.00101919	-0.00301226	-0.00112047	-0.00259286	0.00153894	0.00178635	-0.0150861	0.00565464	0.0203976	0.0116017	-0.0456836	-0.183008	-0.00549798	-11.6659	-119.929	-2.04282	X33
-0.000223469	-0.00064374	-0.000224307	-0.000329079	-0.00144326	-0.00154202	0.000342036	0.000109221	0.000574221	0.00224324	-0.00101853	0.00103988	-0.000636474	2.21862e-05	0.00457287	0.00109858	0.00495151	0.00135726	0.00365995	-0.0110862	-0.00281432	-0.00784203	-0.00286884	0.00119245	-0.0455652	0.0158798	0.0730509	-0.0109867	-0.112851	-0.420224	-0.135549	-0.476974	0.633327	-160.718	X34
Exchange Component of Inter-Strand Interaction Energy
Y1	Y2	Y3	Y4	Y5	Y6	Y7	Y8	Y9	Y10	Y11	Y12	Y13	Y14	Y15	Y16	Y17	Y18	Y19	Y20	Y21	Y22	Y23	Y24	Y25	Y26	Y27	Y28	Y29	Y30	Y31	Y32	Y33	Y34
-20.3565	-0.00199979	-4.00797e-05	-3.18022e-06	-3.23167e-07	-3.3258e-08	-1.88253e-09	0	0	0	0	0	0	0	0	0	0	0	0	0	0	0	0	0	0	0	0	0	0	0	0	0	0	0	X1
-4.91998	-24.7128	-0.0893421	-6.07015e-05	-1.02315e-05	-1.24372e-06	-7.59286e-08	-3.76506e-09	0	0	0	0	0	0	0	0	0	0	0	0	0	0	0	0	0	0	0	0	0	0	0	0	0	0	X2
-0.0155534	-0.018182	-25.0391	-0.00217009	-8.89846e-05	-1.31764e-05	-7.24773e-07	-3.89056e-08	-1.88253e-09	-6.27509e-10	0	0	0	0	0	0	0	0	0	0	0	0	0	0	0	0	0	0	0	0	0	0	0	0	X3
-0.000279056	-0.0148202	-4.42709	-20.5409	-0.0477757	-0.000160649	-1.20959e-05	-6.22489e-07	-3.01205e-08	-9.41264e-09	-6.27509e-10	0	0	0	0	0	0	0	0	0	0	0	0	0	0	0	0	0	0	0	0	0	0	0	X4
-1.72672e-05	-0.000157854	-0.0121526	-0.157083	-23.3479	-0.00309337	-7.26468e-05	-3.24987e-06	-1.90135e-07	-4.83182e-08	-1.88253e-09	0	0	0	0	0	0	0	0	0	0	0	0	0	0	0	0	0	0	0	0	0	0	0	X5
-2.02246e-06	-2.70752e-05	-0.000373843	-0.00839316	-2.29208	-24.5263	-0.0194879	-4.52961e-05	-3.46636e-06	-9.35617e-07	-6.02409e-08	-3.76506e-09	0	0	0	0	0	0	0	0	0	0	0	0	0	0	0	0	0	0	0	0	0	0	X6
-2.52259e-07	-2.79179e-06	-7.36546e-05	-0.000436851	-0.0257574	-2.38125	-19.7746	-0.00136956	-3.2483e-05	-9.56575e-06	-6.3253e-07	-4.64357e-08	-3.76506e-09	-6.27509e-10	0	0	0	0	0	0	0	0	0	0	0	0	0	0	0	0	0	0	0	0	X7
-1.50602e-08	-1.74448e-07	-4.40888e-06	-3.736e-05	-0.000500338	-0.0522153	-7.56811	-25.4781	-0.00501365	-0.000147026	-1.47032e-05	-9.61345e-07	-7.84387e-08	-1.25502e-08	0	0	0	0	0	0	0	0	0	0	0	0	0	0	0	0	0	0	0	0	X8
-6.27509e-10	-7.53011e-09	-2.51631e-07	-2.14043e-06	-2.53432e-05	-0.00075356	-0.0523449	-1.23241	-18.8306	-0.0237697	-0.000251922	-1.01167e-05	-8.62198e-07	-1.53112e-07	-2.51004e-09	-6.27509e-10	0	0	0	0	0	0	0	0	0	0	0	0	0	0	0	0	0	0	X9
0	-6.27509e-10	-1.38052e-08	-1.65663e-07	-1.77648e-06	-3.43888e-05	-0.000443294	-0.00466273	-0.11647	-22.6439	-0.0302382	-0.00014367	-8.0842e-06	-1.50163e-06	-1.75703e-08	-2.51004e-09	-6.27509e-10	0	0	0	0	0	0	0	0	0	0	0	0	0	0	0	0	0	X10
0	0	-6.27509e-10	-1.50602e-08	-1.95783e-07	-2.85517e-06	-1.82932e-05	-0.000120698	-0.00467837	-1.71235	-18.1991	-0.00639635	-7.02164e-05	-1.24234e-05	-2.58534e-07	2.38454e-08	-3.13755e-09	0	0	0	0	0	0	0	0	0	0	0	0	0	0	0	0	0	X11
0	0	0	-3.13755e-09	-2.19628e-08	-1.44327e-07	-1.05484e-06	-1.94842e-05	-0.000261924	-0.0321514	-2.50105	-24.1523	-0.00296408	-0.000152645	-4.14972e-06	-2.74849e-07	-2.25903e-08	-1.25502e-09	0	0	0	0	0	0	0	0	0	0	0	0	0	0	0	0	X12
0	0	0	0	-3.13755e-09	-2.38454e-08	-1.07932e-07	-1.88378e-06	-2.33797e-05	-0.000397387	-0.0225779	-2.7027	-24.4994	-0.0755492	-8.06011e-05	-8.19716e-06	-8.70356e-07	-4.89457e-08	-2.51004e-09	-6.27509e-10	0	0	0	0	0	0	0	0	0	0	0	0	0	0	X13
0	0	0	0	0	-2.51004e-09	-1.19227e-08	-1.8637e-07	-3.33647e-06	-5.62738e-05	-0.000665779	-0.0529008	-6.2332	-19.4	-0.00258812	-2.78382e-05	-3.70607e-06	-1.78213e-07	-1.50602e-08	-1.88253e-09	0	0	0	0	0	0	0	0	0	0	0	0	0	0	X14
0	0	0	0	0	0	-1.25502e-09	-1.31777e-08	-2.76732e-07	-4.09262e-06	-4.37079e-05	-0.000959494	-0.153599	-8.3879	-23.2807	-0.00279963	-8.486e-05	-5.96197e-06	-4.01606e-07	-6.14959e-08	-2.51004e-09	0	0	0	0	0	0	0	0	0	0	0	0	0	X15
0	0	0	0	0	0	0	-6.27509e-10	-2.51004e-08	-3.08107e-07	-2.73092e-06	-3.02987e-05	-0.00154102	-0.0540816	-2.89053	-19.8978	-0.0145922	-5.93222e-05	-7.4636e-06	-7.93172e-07	-3.0748e-08	-2.51004e-09	0	0	0	0	0	0	0	0	0	0	0	0	X16
0	0	0	0	0	0	0	0	-2.51004e-09	-2.44729e-08	-2.33434e-07	-2.25652e-06	-7.88685e-05	-0.000589903	-0.030187	-2.98063	-24.1618	-0.00288589	-4.90825e-05	-1.1479e-05	-4.34864e-07	-3.51405e-08	-3.13755e-09	-6.27509e-10	0	0	0	0	0	0	0	0	0	0	X17
0	0	0	0	0	0	0	0	0	-1.88253e-09	-1.63152e-08	-1.3366e-07	-3.344e-06	-3.10209e-05	-0.000488202	-0.0354696	-3.37383	-23.8561	-0.00242679	-0.000104103	-7.60604e-06	-4.69377e-07	-4.64357e-08	-7.53011e-09	-6.27509e-10	0	0	0	0	0	0	0	0	0	X18
0	0	0	0	0	0	0	0	0	0	-1.25502e-09	-7.53011e-09	-2.53514e-07	-1.54744e-06	-2.67526e-05	-0.000538729	-0.0288248	-2.26227	-20.2713	-0.0145185	-6.43524e-05	-8.45255e-06	-1.02849e-06	-2.04568e-07	-1.31777e-08	-2.51004e-09	0	0	0	0	0	0	0	0	X19
0	0	0	0	0	0	0	0	0	0	0	-6.27509e-10	-2.88654e-08	-1.95783e-07	-2.22703e-06	-4.36125e-05	-0.000369178	-0.0224925	-2.39338	-24.4979	-0.00244603	-6.48544e-05	-8.31638e-06	-1.46461e-06	-1.14207e-07	-1.44327e-08	-6.27509e-10	0	0	0	0	0	0	0	X20
0	0	0	0	0	0	0	0	0	0	0	0	-1.25502e-09	-9.41264e-09	-1.16717e-07	-1.9139e-06	-1.90035e-05	-0.000276833	-0.018524	-1.04836	-19.8412	-0.00958399	-0.000129916	-2.35373e-05	-2.53012e-06	-2.32806e-07	-3.13755e-09	6.27509e-10	0	0	0	0	0	0	X21
0	0	0	0	0	0	0	0	0	0	0	0	0	-6.27509e-10	-1.00402e-08	-2.63554e-07	-1.91014e-06	-2.42143e-05	-0.000335669	-0.01063	-1.36736	-20.6673	-0.0161302	-0.000396316	-2.68838e-05	-2.74033e-06	2.38454e-08	-1.00402e-08	6.27509e-10	0	0	0	0	0	X22
0	0	0	0	0	0	0	0	0	0	0	0	0	0	-5.02008e-09	-9.16164e-08	-1.31777e-08	-2.31112e-06	-4.42237e-05	-0.000206176	-0.0102366	-1.22567	-24.0607	-0.073052	-0.000246468	-1.91698e-05	-6.53865e-07	-7.46736e-08	-1.25502e-09	0	0	0	0	0	X23
0	0	0	0	0	0	0	0	0	0	0	0	0	0	-6.27509e-10	-6.9026e-09	0	-1.16717e-07	-2.11408e-06	-1.84011e-05	-0.000264411	-0.014584	-0.202365	-19.3916	-0.00590579	-0.000156178	-4.4641e-06	-5.40913e-07	-8.78513e-09	-6.27509e-10	0	0	0	0	X24
0	0	0	0	0	0	0	0	0	0	0	0	0	0	0	0	-6.27509e-10	-8.15762e-09	-1.3868e-07	-1.32279e-06	-1.79097e-05	-0.000218535	-0.00566679	-0.947552	-25.2613	-0.033497	-5.65537e-05	-8.034e-06	-1.33032e-07	-1.12952e-08	-1.88253e-09	0	0	0	X25
0	0	0	0	0	0	0	0	0	0	0	0	0	0	0	0	0	-6.27509e-10	-1.12952e-08	-1.31777e-07	-2.12349e-06	-2.38931e-05	-0.000306737	-0.0177603	-1.75805	-19.9282	-0.0024835	-5.82881e-05	-2.18185e-06	-1.90763e-07	-3.13755e-08	-3.76506e-09	0	0	X26
0	0	0	0	0	0	0	0	0	0	0	0	0	0	0	0	0	0	-1.25502e-09	-7.53011e-09	-1.92645e-07	-1.96661e-06	-3.17514e-05	-0.000484186	-0.0449038	-6.59534	-24.065	-0.0148263	-3.56927e-05	-3.39608e-06	-4.98243e-07	-6.02409e-08	-1.88253e-09	-6.27509e-10	X27
0	0	0	0	0	0	0	0	0	0	0	0	0	0	0	0	0	0	0	-6.27509e-10	-1.06677e-08	-1.01029e-07	-1.55058e-06	-1.7094e-05	-0.000443258	-0.0245924	-0.161657	-25.4026	-0.000816229	-1.92451e-05	-3.43059e-06	-4.22941e-07	-1.63152e-08	-3.13755e-09	X28
0	0	0	0	0	0	0	0	0	0	0	0	0	0	0	0	0	0	0	0	-1.88253e-09	-1.81978e-08	-2.63554e-07	-2.38893e-06	-4.65788e-05	-0.000534152	-0.0445265	-9.5553	-24.8761	-0.00559135	-0.000173992	-2.44258e-05	-1.43323e-06	-1.53112e-07	X29
0	0	0	0	0	0	0	0	0	0	0	0	0	0	0	0	0	0	0	0	0	-6.27509e-10	-1.12952e-08	-8.15762e-08	-1.40123e-06	-2.03658e-05	-0.000587669	-0.0510558	-2.46657	-23.7144	-0.0738376	-0.000400568	-1.54951e-05	-1.68047e-06	X30
0	0	0	0	0	0	0	0	0	0	0	0	0	0	0	0	0	0	0	0	0	0	-1.88253e-09	-1.12952e-08	-1.55622e-07	-1.9434e-06	-2.657e-05	-0.000392191	-0.0117957	-0.0328769	-19.8989	-0.0170379	-5.84368e-05	-6.93335e-06	X31
0	0	0	0	0	0	0	0	0	0	0	0	0	0	0	0	0	0	0	0	0	0	0	0	-5.02008e-09	-7.09086e-08	-9.86445e-07	-2.30277e-05	-0.000209886	-0.00189885	-1.06586	-19.3255	-0.00187342	-4.19534e-05	X32
0	0	0	0	0	0	0	0	0	0	0	0	0	0	0	0	0	0	0	0	0	0	0	0	-6.27509e-10	-6.27509e-09	-9.03614e-08	-1.63968e-06	-2.33728e-05	-0.000161611	-0.0249265	-5.3944	-19.7166	-0.0289789	X33
0	0	0	0	0	0	0	0	0	0	0	0	0	0	0	0	0	0	0	0	0	0	0	0	0	-6.27509e-10	-1.00402e-08	-1.55622e-07	-1.86119e-06	-1.6981e-05	-0.000218027	-0.0161429	-0.0745963	-23.2307	X34
Dispersion Component of Inter-Strand Interaction Energy
Y1	Y2	Y3	Y4	Y5	Y6	Y7	Y8	Y9	Y10	Y11	Y12	Y13	Y14	Y15	Y16	Y17	Y18	Y19	Y20	Y21	Y22	Y23	Y24	Y25	Y26	Y27	Y28	Y29	Y30	Y31	Y32	Y33	Y34
-7.40182	-0.197544	-0.0347485	-0.00669812	-0.00219131	-0.000728235	-0.00027361	-8.93799e-05	-4.62048e-05	-2.84312e-05	-1.49975e-05	-9.06563e-06	-5.52146e-06	-3.59249e-06	-1.82166e-06	-1.37676e-06	-8.47765e-07	-5.85466e-07	-4.70005e-07	-3.0497e-07	-2.51004e-07	-1.88253e-07	-1.27384e-07	-1.28012e-07	-1.03539e-07	-7.84387e-08	-4.83182e-08	-5.14558e-08	-3.0748e-08	-2.57279e-08	-2.63554e-08	-2.19628e-08	-1.56877e-08	-1.56877e-08	X1
-8.71797	-8.89798	-1.00553	-0.0350282	-0.00976362	-0.00250617	-0.000876853	-0.000273779	-0.000134807	-7.4769e-05	-3.64646e-05	-2.04957e-05	-1.16466e-05	-7.16867e-06	-3.42495e-06	-2.51694e-06	-1.5305e-06	-1.04606e-06	-8.30195e-07	-5.27735e-07	-4.27334e-07	-3.13127e-07	-2.08333e-07	-2.06451e-07	-1.64407e-07	-1.23619e-07	-7.53011e-08	-7.90662e-08	-4.70632e-08	-3.89056e-08	-4.01606e-08	-3.26305e-08	-2.32179e-08	-2.32179e-08	X2
-0.222168	-0.666364	-8.90817	-0.20345	-0.0409962	-0.00714213	-0.00210879	-0.000573007	-0.000248294	-0.000123166	-5.50953e-05	-2.87136e-05	-1.52497e-05	-8.95268e-06	-4.08007e-06	-2.91792e-06	-1.7382e-06	-1.16027e-06	-8.95456e-07	-5.57856e-07	-4.44904e-07	-3.21285e-07	-2.09588e-07	-2.03313e-07	-1.60642e-07	-1.19227e-07	-7.21636e-08	-7.53011e-08	-4.45532e-08	-3.63956e-08	-3.70231e-08	-3.01205e-08	-2.13353e-08	-2.07078e-08	X3
-0.0366781	-0.216049	-8.28735	-7.43987	-0.989822	-0.0536324	-0.0103513	-0.00219663	-0.000876333	-0.000380102	-0.000158095	-7.64501e-05	-3.79292e-05	-2.08013e-05	-8.82216e-06	-5.95005e-06	-3.42808e-06	-2.22138e-06	-1.68675e-06	-1.03602e-06	-8.14507e-07	-5.77936e-07	-3.70231e-07	-3.5266e-07	-2.74222e-07	-2.00176e-07	-1.19227e-07	-1.22992e-07	-7.21636e-08	-5.83584e-08	-5.96134e-08	-4.76907e-08	-3.3258e-08	-3.26305e-08	X4
-0.00522898	-0.0225246	-0.280944	-0.979759	-8.42906	-0.267118	-0.0397779	-0.00627469	-0.00220179	-0.000795737	-0.000297497	-0.000130433	-5.93938e-05	-3.03721e-05	-1.1998e-05	-7.62863e-06	-4.22126e-06	-2.65813e-06	-1.98607e-06	-1.19541e-06	-9.17419e-07	-6.38177e-07	-4.01606e-07	-3.77761e-07	-2.87399e-07	-2.07078e-07	-1.21109e-07	-1.24247e-07	-7.21636e-08	-5.83584e-08	-5.89859e-08	-4.64357e-08	-3.2003e-08	-3.13755e-08	X5
-0.00124855	-0.00423837	-0.0360846	-0.188813	-4.8955	-8.76993	-0.518816	-0.0314509	-0.00786366	-0.00234296	-0.000792111	-0.000314795	-0.000132933	-6.33515e-05	-2.30315e-05	-1.35348e-05	-7.0576e-06	-4.18361e-06	-3.00389e-06	-1.77585e-06	-1.34475e-06	-9.20556e-07	-5.67896e-07	-5.2648e-07	-3.94703e-07	-2.78614e-07	-1.60015e-07	-1.6127e-07	-9.22439e-08	-7.40461e-08	-7.40461e-08	-5.77309e-08	-4.01606e-08	-3.89056e-08	X6
-0.000435042	-0.00117657	-0.00666587	-0.0307654	-0.339397	-4.556	-7.36322	-0.170097	-0.0332813	-0.00803799	-0.00249064	-0.000892988	-0.000346659	-0.00015306	-5.06024e-05	-2.73029e-05	-1.34168e-05	-7.49811e-06	-5.1437e-06	-2.95808e-06	-2.2126e-06	-1.49347e-06	-9.03614e-07	-8.2141e-07	-6.07429e-07	-4.21059e-07	-2.37199e-07	-2.35316e-07	-1.31777e-07	-1.04794e-07	-1.04167e-07	-8.15762e-08	-5.58483e-08	-5.33383e-08	X7
-0.000188302	-0.000399578	-0.00176909	-0.00700227	-0.0507984	-0.564979	-11.0495	-8.85931	-0.323485	-0.050785	-0.0101746	-0.00288121	-0.000988557	-0.000428791	-0.00013749	-6.91415e-05	-3.08835e-05	-1.58195e-05	-9.98179e-06	-5.47e-06	-3.87989e-06	-2.57091e-06	-1.53928e-06	-1.38617e-06	-1.00904e-06	-6.90888e-07	-3.82781e-07	-3.73996e-07	-2.05196e-07	-1.60015e-07	-1.57505e-07	-1.21737e-07	-8.28313e-08	-7.84387e-08	X8
-8.25621e-05	-0.000148601	-0.000539644	-0.00160943	-0.00763752	-0.0509311	-0.469528	-3.39508	-7.12924	-0.77543	-0.0703433	-0.011685	-0.00302328	-0.0011621	-0.000328147	-0.000149422	-6.12142e-05	-2.90524e-05	-1.71235e-05	-8.87424e-06	-5.98519e-06	-3.83032e-06	-2.23393e-06	-1.96787e-06	-1.4006e-06	-9.44402e-07	-5.14558e-07	-4.93222e-07	-2.66692e-07	-2.04568e-07	-1.98921e-07	-1.51857e-07	-1.02284e-07	-9.6009e-08	X9
-3.1799e-05	-5.04298e-05	-0.00015994	-0.00038706	-0.00141808	-0.00626413	-0.0357657	-0.180439	-1.02241	-8.46523	-0.582552	-0.048961	-0.00857585	-0.00294326	-0.00073117	-0.000295682	-0.000107961	-4.64075e-05	-2.5133e-05	-1.22327e-05	-7.71837e-06	-4.74397e-06	-2.69013e-06	-2.32116e-06	-1.61395e-06	-1.07053e-06	-5.71661e-07	-5.40286e-07	-2.86772e-07	-2.15863e-07	-2.05823e-07	-1.55622e-07	-1.03539e-07	-9.6009e-08	X10
-1.87224e-05	-2.66102e-05	-7.49591e-05	-0.000150324	-0.000456823	-0.00152687	-0.00596863	-0.0256987	-0.152265	-3.76479	-7.01718	-0.359529	-0.0353314	-0.0111489	-0.00254427	-0.000950201	-0.000307138	-0.000118038	-5.7254e-05	-2.56156e-05	-1.47647e-05	-8.5837e-06	-4.68687e-06	-3.9577e-06	-2.68323e-06	-1.75012e-06	-9.23066e-07	-8.54668e-07	-4.44277e-07	-3.28815e-07	-3.08107e-07	-2.27786e-07	-1.49347e-07	-1.37425e-07	X11
-1.0507e-05	-1.39414e-05	-3.58967e-05	-6.12625e-05	-0.000166184	-0.000450106	-0.00142032	-0.00504684	-0.0302576	-0.379173	-4.56675	-8.62727	-0.252411	-0.0502403	-0.00719714	-0.00231779	-0.000690689	-0.000245926	-0.000110288	-4.49692e-05	-2.38749e-05	-1.28815e-05	-6.63717e-06	-5.3696e-06	-3.51719e-06	-2.24962e-06	-1.16905e-06	-1.05798e-06	-5.45306e-07	-3.98469e-07	-3.67721e-07	-2.67319e-07	-1.7131e-07	-1.55622e-07	X12
-6.4213e-06	-8.19402e-06	-1.96749e-05	-3.00389e-05	-7.34092e-05	-0.00016729	-0.000426312	-0.0011584	-0.00535582	-0.0393688	-0.322849	-5.33727	-8.72431	-0.794062	-0.0394749	-0.008348	-0.00220665	-0.000699519	-0.000287752	-0.000105371	-5.13974e-05	-2.53815e-05	-1.21304e-05	-9.19866e-06	-5.72979e-06	-3.53727e-06	-1.77962e-06	-1.57379e-06	-8.02585e-07	-5.76054e-07	-5.23343e-07	-3.72741e-07	-2.34689e-07	-2.10216e-07	X13
-4.59713e-06	-5.74548e-06	-1.30723e-05	-1.85962e-05	-4.16591e-05	-8.41722e-05	-0.000183717	-0.000401936	-0.00150905	-0.00728507	-0.0420418	-0.438215	-7.01674	-7.24937	-0.20027	-0.0353431	-0.00857762	-0.00239019	-0.000882664	-0.000285713	-0.000124848	-5.58521e-05	-2.4732e-05	-1.77002e-05	-1.04292e-05	-6.18536e-06	-3.00452e-06	-2.59475e-06	-1.3071e-06	-9.24321e-07	-8.2392e-07	-5.77309e-07	-3.54543e-07	-3.125e-07	X14
-3.66779e-06	-4.57141e-06	-1.00979e-05	-1.40129e-05	-2.95833e-05	-5.48299e-05	-0.000105061	-0.000187102	-0.000572619	-0.00217162	-0.00920468	-0.0655838	-0.884235	-11.6718	-8.48121	-0.264246	-0.0363611	-0.00691638	-0.00230354	-0.000744972	-0.000334475	-0.000143216	-5.81871e-05	-3.83377e-05	-2.1346e-05	-1.18129e-05	-5.3445e-06	-4.48858e-06	-2.17244e-06	-1.52297e-06	-1.33597e-06	-9.25577e-07	-5.69779e-07	-4.95105e-07	X15
-2.29668e-06	-2.78928e-06	-5.96385e-06	-8.07981e-06	-1.62136e-05	-2.85962e-05	-5.08741e-05	-8.07473e-05	-0.000209505	-0.000657671	-0.00207197	-0.00915794	-0.0660109	-0.511837	-4.86896	-7.41247	-0.455331	-0.0357487	-0.00745803	-0.00207967	-0.00081947	-0.000320538	-0.000119052	-7.29988e-05	-3.79907e-05	-1.97628e-05	-8.40988e-06	-6.78526e-06	-3.12688e-06	-2.1373e-06	-1.83233e-06	-1.24561e-06	-7.57404e-07	-6.44452e-07	X16
-1.59136e-06	-1.88755e-06	-3.92633e-06	-5.22966e-06	-1.00583e-05	-1.70325e-05	-2.84368e-05	-4.10605e-05	-9.31532e-05	-0.000253713	-0.000639935	-0.00210182	-0.00964151	-0.0510913	-0.385761	-5.07435	-8.78499	-0.247204	-0.0285024	-0.00677541	-0.00234148	-0.00085679	-0.000291515	-0.000165701	-8.01311e-05	-3.87562e-05	-1.53137e-05	-1.17181e-05	-5.06149e-06	-3.35153e-06	-2.80559e-06	-1.86872e-06	-1.12512e-06	-9.38754e-07	X17
-1.08371e-06	-1.25063e-06	-2.52949e-06	-3.29693e-06	-6.14708e-06	-1.00966e-05	-1.62017e-05	-2.21611e-05	-4.57856e-05	-0.000113102	-0.000242443	-0.000639586	-0.0021207	-0.00775638	-0.0406115	-0.377895	-5.87791	-8.63832	-0.255865	-0.035066	-0.00763068	-0.00240871	-0.000738397	-0.000387243	-0.000171039	-7.75344e-05	-2.86797e-05	-2.0524e-05	-8.30258e-06	-5.2397e-06	-4.25953e-06	-2.75351e-06	-1.6127e-06	-1.3184e-06	X18
-7.29794e-07	-8.2141e-07	-1.61646e-06	-2.04819e-06	-3.71172e-06	-5.91616e-06	-9.18423e-06	-1.21028e-05	-2.35147e-05	-5.39457e-05	-0.000103704	-0.000236647	-0.000627221	-0.00175618	-0.00609598	-0.0388747	-0.332138	-4.44634	-7.43735	-0.468878	-0.0386538	-0.00832694	-0.0021503	-0.000997645	-0.000387013	-0.000162623	-5.57517e-05	-3.69666e-05	-1.40506e-05	-8.37662e-06	-6.54618e-06	-4.07944e-06	-2.29794e-06	-1.83484e-06	X19
-5.45933e-07	-5.96762e-07	-1.14771e-06	-1.41315e-06	-2.49372e-06	-3.8755e-06	-5.85592e-06	-7.50878e-06	-1.39288e-05	-2.98538e-05	-5.23889e-05	-0.00010678	-0.000238309	-0.00054238	-0.00141157	-0.00663134	-0.0378771	-0.353825	-4.54868	-8.67219	-0.244779	-0.0346498	-0.00736042	-0.00305814	-0.00102507	-0.000403335	-0.000128696	-7.82002e-05	-2.76249e-05	-1.53533e-05	-1.13611e-05	-6.76581e-06	-3.65022e-06	-2.84199e-06	X20
-3.80271e-07	-4.05371e-07	-7.66817e-07	-9.16164e-07	-1.57693e-06	-2.37826e-06	-3.49837e-06	-4.36056e-06	-7.85767e-06	-1.59582e-05	-2.64476e-05	-5.02001e-05	-0.000100418	-0.00019719	-0.000406707	-0.00145925	-0.00550708	-0.0349199	-0.278312	-3.31132	-7.47055	-0.445738	-0.0479779	-0.0133014	-0.00323769	-0.00110126	-0.000308184	-0.000167745	-5.517e-05	-2.86144e-05	-1.97653e-05	-1.11176e-05	-5.67269e-06	-4.29216e-06	X21
-2.85517e-07	-2.98695e-07	-5.52836e-07	-6.4257e-07	-1.08308e-06	-1.58634e-06	-2.27284e-06	-2.76606e-06	-4.88202e-06	-9.49987e-06	-1.5059e-05	-2.70425e-05	-4.97872e-05	-8.7461e-05	-0.000151915	-0.000443218	-0.00128468	-0.0056384	-0.0348543	-0.263697	-3.31166	-7.56983	-0.511976	-0.0842316	-0.0121031	-0.00346	-0.000841798	-0.000403246	-0.000123498	-5.91202e-05	-3.76763e-05	-1.97665e-05	-9.41829e-06	-6.88252e-06	X22
-2.28413e-07	-2.35944e-07	-4.26706e-07	-4.83182e-07	-7.9882e-07	-1.13705e-06	-1.58321e-06	-1.87876e-06	-3.24987e-06	-6.11634e-06	-9.38754e-06	-1.61784e-05	-2.80785e-05	-4.53752e-05	-6.91622e-05	-0.000170647	-0.000402897	-0.00135359	-0.00628984	-0.0339975	-0.282632	-3.41667	-8.68917	-1.12401	-0.0663975	-0.0138431	-0.00270828	-0.00111747	-0.000321715	-0.00014213	-8.24623e-05	-3.98287e-05	-1.74931e-05	-1.21913e-05	X23
-1.52485e-07	-1.55622e-07	-2.76732e-07	-3.08735e-07	-5.0138e-07	-7.02811e-07	-9.58207e-07	-1.11571e-06	-1.88504e-06	-3.44628e-06	-5.15436e-06	-8.59437e-06	-1.42708e-05	-2.18813e-05	-3.10529e-05	-7.00784e-05	-0.000147197	-0.000417609	-0.00157368	-0.00585019	-0.0345851	-0.21929	-1.41314	-7.2462	-0.333683	-0.0527064	-0.00766576	-0.00256138	-0.000655049	-0.00025824	-0.000136104	-6.05904e-05	-2.47377e-05	-1.63654e-05	X24
-1.05422e-07	-1.06677e-07	-1.87625e-07	-2.06451e-07	-3.28815e-07	-4.50552e-07	-5.99899e-07	-6.76455e-07	-1.1201e-06	-1.9867e-06	-2.90851e-06	-4.74397e-06	-7.6895e-06	-1.1356e-05	-1.51073e-05	-3.0406e-05	-5.58126e-05	-0.000131709	-0.000407968	-0.00120654	-0.00575047	-0.0299815	-0.205009	-3.08943	-8.82078	-0.652398	-0.0340265	-0.00815743	-0.00173492	-0.000638431	-0.000299965	-0.000121615	-4.63711e-05	-2.83998e-05	X25
-9.09889e-08	-9.16164e-08	-1.60015e-07	-1.7382e-07	-2.71712e-07	-3.64583e-07	-4.74397e-07	-5.20833e-07	-8.44e-07	-1.46461e-06	-2.08898e-06	-3.31827e-06	-5.24535e-06	-7.53576e-06	-9.57956e-06	-1.78464e-05	-2.95676e-05	-6.11132e-05	-0.000161915	-0.000394006	-0.00150768	-0.00585779	-0.0299894	-0.265125	-3.73629	-7.23546	-0.203665	-0.0398716	-0.00671736	-0.00220715	-0.000900069	-0.000324444	-0.000112319	-6.30816e-05	X26
-8.53413e-08	-8.59688e-08	-1.47465e-07	-1.60642e-07	-2.48494e-07	-3.3007e-07	-4.21686e-07	-4.51807e-07	-7.08458e-07	-1.20356e-06	-1.67294e-06	-2.58973e-06	-4.01732e-06	-5.73293e-06	-7.23581e-06	-1.30585e-05	-2.02554e-05	-3.76324e-05	-8.44672e-05	-0.000172595	-0.000533702	-0.00174138	-0.00693294	-0.050846	-0.528236	-10.2077	-8.70159	-0.777726	-0.0275051	-0.00686939	-0.00263137	-0.000892465	-0.000312411	-0.000155739	X27
-5.08283e-08	-5.08283e-08	-8.59688e-08	-9.22439e-08	-1.41817e-07	-1.8637e-07	-2.34689e-07	-2.47239e-07	-3.79016e-07	-6.3504e-07	-8.64081e-07	-1.30083e-06	-1.9641e-06	-2.74598e-06	-3.36784e-06	-5.88227e-06	-8.68912e-06	-1.51556e-05	-3.12556e-05	-5.7633e-05	-0.000154395	-0.000419121	-0.0012754	-0.00627829	-0.0381435	-0.292472	-1.21739	-8.90786	-0.140857	-0.0249921	-0.00716612	-0.00201746	-0.000622701	-0.000270034	X28
-5.33383e-08	-5.27108e-08	-8.91063e-08	-9.53814e-08	-1.44327e-07	-1.88253e-07	-2.35316e-07	-2.44729e-07	-3.68348e-07	-6.05547e-07	-8.00075e-07	-1.17031e-06	-1.7131e-06	-2.34563e-06	-2.82693e-06	-4.89395e-06	-7.03501e-06	-1.18493e-05	-2.28056e-05	-3.79248e-05	-8.61338e-05	-0.000193727	-0.000471989	-0.00181759	-0.0074885	-0.0438595	-0.37732	-13.5518	-8.71315	-0.34758	-0.058877	-0.0104778	-0.00242732	-0.000918494	X29
-4.26706e-08	-4.14156e-08	-6.96536e-08	-7.40461e-08	-1.11069e-07	-1.43072e-07	-1.76958e-07	-1.82605e-07	-2.71084e-07	-4.37374e-07	-5.66014e-07	-8.09487e-07	-1.15211e-06	-1.53489e-06	-1.79719e-06	-3.04091e-06	-4.25577e-06	-6.9572e-06	-1.28307e-05	-1.9931e-05	-4.11107e-05	-8.15386e-05	-0.00016822	-0.000527799	-0.00163493	-0.00636503	-0.035455	-0.51557	-4.69505	-8.5698	-1.14755	-0.0786554	-0.0096361	-0.00298436	X30
-2.88654e-08	-2.76104e-08	-4.64357e-08	-4.89457e-08	-7.27911e-08	-9.28714e-08	-1.14207e-07	-1.16089e-07	-1.70683e-07	-2.69829e-07	-3.41993e-07	-4.80045e-07	-6.70808e-07	-8.75376e-07	-1.00276e-06	-1.6629e-06	-2.2628e-06	-3.5812e-06	-6.35291e-06	-9.31287e-06	-1.78162e-05	-3.22716e-05	-5.96548e-05	-0.000165066	-0.000427574	-0.00129322	-0.00469696	-0.0369367	-0.179725	-0.659543	-7.29592	-0.569404	-0.0391071	-0.00895159	X31
-2.44729e-08	-2.32179e-08	-3.76506e-08	-3.89056e-08	-5.83584e-08	-7.40461e-08	-8.97339e-08	-9.16164e-08	-1.33032e-07	-2.07706e-07	-2.59789e-07	-3.5768e-07	-4.86947e-07	-6.19352e-07	-6.88378e-07	-1.12889e-06	-1.51418e-06	-2.35818e-06	-4.1127e-06	-5.83647e-06	-1.05911e-05	-1.76613e-05	-2.93047e-05	-7.24717e-05	-0.000162024	-0.000407478	-0.00119102	-0.00662444	-0.0294353	-0.141724	-2.65086	-7.38928	-0.164853	-0.0337406	X32
-2.32179e-08	-2.19628e-08	-3.5768e-08	-3.63956e-08	-5.39658e-08	-6.7771e-08	-8.22037e-08	-8.28313e-08	-1.19227e-07	-1.84488e-07	-2.29668e-07	-3.13127e-07	-4.19804e-07	-5.22088e-07	-5.62876e-07	-8.94829e-07	-1.1747e-06	-1.79217e-06	-3.09362e-06	-4.32229e-06	-7.73092e-06	-1.24153e-05	-1.93022e-05	-4.3915e-05	-8.79819e-05	-0.000186801	-0.000424909	-0.001845	-0.00647245	-0.0326984	-0.392235	-9.14184	-7.42849	-0.862189	X33
-1.50602e-08	-1.44327e-08	-2.32179e-08	-2.32179e-08	-3.38855e-08	-4.20431e-08	-5.08283e-08	-5.08283e-08	-7.27911e-08	-1.11069e-07	-1.37425e-07	-1.85115e-07	-2.43474e-07	-2.96184e-07	-3.11245e-07	-4.81927e-07	-6.19979e-07	-9.26832e-07	-1.57128e-06	-2.13981e-06	-3.72615e-06	-5.76744e-06	-8.45757e-06	-1.78941e-05	-3.30051e-05	-6.21881e-05	-0.000118729	-0.000421738	-0.00114016	-0.0043351	-0.0300688	-0.256743	-0.820649	-8.42255	X34
Total Inter-Strand Interaction Energy
Y1	Y2	Y3	Y4	Y5	Y6	Y7	Y8	Y9	Y10	Y11	Y12	Y13	Y14	Y15	Y16	Y17	Y18	Y19	Y20	Y21	Y22	Y23	Y24	Y25	Y26	Y27	Y28	Y29	Y30	Y31	Y32	Y33	Y34
-152.77	-1.13691	-0.158394	-0.0533759	-0.124319	-0.0381729	0.00720728	-0.0227312	-0.0012367	0.014627	-0.00363099	-0.00205882	-0.00526963	0.000831675	0.00446951	0.00123875	-0.000233701	-0.00170591	0.000140405	-0.002037	-0.000614302	-0.000610045	0.000798094	0.000219146	-0.000984663	0.000228317	2.57932e-05	0.00046062	-0.000602639	-0.000593244	-0.000104418	-7.75288e-05	-0.0001365	-0.000401455	X1
-26.3259	-203.346	5.49422	-0.106234	0.464471	-0.0658294	0.0164332	0.130653	0.0202765	-0.0225783	0.00439746	0.026475	0.025087	-0.00423888	-0.00677361	-0.00476982	0.0072087	0.0079001	0.0012528	0.00260394	0.00180167	0.000916764	-0.00420431	-0.000997817	0.00104141	-0.000356717	0.00137845	-0.00216354	0.00174848	0.000824832	5.54894e-05	-7.91026e-05	-7.22797e-05	0.000985083	X2
-0.730337	6.66083	-206.392	-1.30812	-1.69371	-0.216943	-0.00309266	-0.157284	0.00116603	0.0752594	-0.0168813	-0.0124596	-0.0247976	0.00505875	0.017566	0.00559635	-0.000555986	-0.00578478	0.00091707	-0.00646007	-0.00197199	-0.00191281	0.00330067	0.00109543	-0.00289698	0.000812153	0.000229981	0.00149302	-0.00196013	-0.00174936	-0.00026875	-0.000191702	-0.000330596	-0.00128154	X3
-0.0143186	-0.585503	-25.0682	-153.314	-4.21332	-0.397284	-0.0110617	-0.0517258	0.014373	0.0297171	-0.00519036	0.00562405	-0.000953048	0.000946481	0.00535076	0.00107437	0.00258713	0.000595629	0.000901995	-0.00136204	-7.1398e-05	-0.00038796	2.29769e-05	0.000191789	-0.000657013	0.000215186	0.000556805	-0.000120979	-0.000197913	-0.000349458	-6.62374e-05	-8.07209e-05	-0.00012289	-0.000183668	X4
-0.0437089	-1.16153	1.19216	-0.751538	-192.292	-6.82399	0.249863	0.120031	0.126771	0.166883	-0.0367809	0.0736879	0.0243483	-0.00111332	0.0228021	-0.000549343	0.0180655	0.00804121	0.00481852	-0.00615986	0.000525785	-0.00146725	-0.00303865	-5.63278e-05	-0.00279558	0.000722227	0.00316579	-0.00173057	0.000111078	-0.00124106	-0.000306509	-0.000433239	-0.000628967	-0.000255214	X5
0.00677673	-0.377244	1.00532	-1.67826	-13.0903	-201.64	2.44364	0.961204	0.201678	0.111648	-0.0347314	0.146458	0.0799121	-0.00732792	0.00934966	-0.00564314	0.0274588	0.0182551	0.00559051	-0.00019135	0.00295468	0.000339949	-0.00631689	-0.000671631	-0.000335325	0.000229511	0.00380768	-0.00333506	0.00169124	0.000116579	-8.77748e-05	-0.000297467	-0.000382449	0.000649489	X6
0.011599	0.110868	-0.00816603	0.0665887	0.0771846	-7.57604	-147.475	-1.5309	-0.102929	-0.163139	0.0417321	-0.0568896	-0.00763007	0.000969965	-0.0224039	-0.000136569	-0.00811164	-0.0012138	-0.00234491	0.00599071	0.000529736	0.00147524	0.00091423	-4.89771e-06	0.00236428	-0.000503526	-0.0013193	0.000365302	0.000400987	0.00104476	0.000223413	0.000255297	0.000385468	0.000367833	X7
-0.0211318	-0.00125391	-0.178915	0.0317891	-0.706563	-2.44344	-38.5227	-209.464	1.13655	2.18373	-0.180386	-0.0380371	-0.149214	0.0309598	0.082185	0.0202729	-0.00927805	-0.0230463	0.00133817	-0.0177313	-0.00527928	-0.00458662	0.00808561	0.00217172	-0.00608839	0.00148126	-0.000505749	0.00334178	-0.00370115	-0.00307626	-0.00045442	-0.000277055	-0.000506743	-0.00206886	X8
0.00337177	0.0273276	-0.0251494	0.0329584	0.0942439	0.268305	-0.676221	-4.5555	-140.112	-3.43193	0.0478346	0.0867047	0.0765798	0.0055089	-0.0238992	0.00680538	0.00107542	0.00457549	0.000168997	0.00795036	0.00141709	0.00155568	0.00182769	0.000914961	0.00234411	-8.33615e-05	-0.000431683	0.000309596	3.32072e-05	0.000799975	0.00022687	0.000232007	0.000339582	2.79781e-05	X9
0.00714951	0.0687305	-0.0600529	0.0696708	0.141065	0.440182	-0.235185	-1.85432	-0.845271	-187.777	3.05251	-1.49921	-0.137664	-0.0242103	-0.193935	0.0218546	-0.0652669	-0.013353	-0.0112723	0.031828	0.00155027	0.00555669	0.00906269	0.00169401	0.00873047	-0.00124633	-0.00552828	0.00316328	-0.000169129	0.00304374	0.000799272	0.000945071	0.00133956	0.000292721	X10
-0.00340171	-0.00287445	-0.0177968	-0.00592061	-0.0592473	-0.079755	0.0354712	-0.255463	-0.577465	-4.21465	-137.161	1.21463	0.119385	0.036929	0.0871846	0.0349627	0.00487786	-0.0137785	0.00292985	-0.00989536	-0.00194272	-0.00226753	0.00555573	0.00212756	-0.00326508	0.00114997	0.000656305	0.0015254	-0.002097	-0.00163474	-0.000200952	-0.00013198	-0.000257163	-0.00115897	X11
-0.00429139	0.0188663	-0.0474252	0.0164132	-0.0386594	0.0175605	-0.00658716	-0.448435	-0.448065	0.949834	-10.5505	-197.73	-6.53601	0.127393	0.0703971	0.12354	-0.182753	-0.127671	-0.0124197	-0.0228671	-0.0133279	-0.00588536	0.026743	0.00545463	-0.00634595	0.00166786	-0.00560427	0.00857966	-0.00667299	-0.00326305	-0.000245903	0.000176613	5.00866e-05	-0.00295985	X12
-0.00497708	-0.00176335	-0.024761	-4.27604e-05	-0.056299	-0.0554759	0.00574046	-0.112024	0.0239348	0.875839	-1.03951	-15.5426	-200.773	1.90255	0.844453	0.131541	-0.198482	-0.179233	0.0134009	-0.0764827	-0.0191809	-0.0141077	0.0295558	0.00800209	-0.0157556	0.0039409	-0.000258297	0.00721473	-0.00809128	-0.0063783	-0.000840254	-0.000509986	-0.000903893	-0.0039114	X13
0.000374195	-0.00746535	0.0110622	-0.00465484	0.00438249	-0.00445672	0.00825707	0.0521303	0.0410647	0.0158526	0.0652119	-0.454765	-26.0374	-145.592	-1.56118	-0.0880455	0.282924	0.171837	0.0187352	0.00940936	0.00966882	0.0013026	-0.0222897	-0.00412866	0.0013899	-0.000589172	0.00483519	-0.0058996	0.00385918	0.000958484	-0.000103594	-0.000364264	-0.000390335	0.00145801	X14
0.00201827	0.0131376	-0.00336714	0.0104846	0.034174	0.0608881	-0.00358385	-0.0481023	-0.0596532	-0.0810721	0.213628	-0.465891	-3.18183	-43.0992	-192.174	1.72298	-1.58056	-0.190012	-0.107046	0.191772	-0.00498692	0.020444	0.017922	-0.00534113	0.023539	-0.00651819	-0.0184037	0.00714845	0.00196631	0.00704657	0.00136502	0.00164567	0.0022647	0.00200216	X15
0.000399904	-0.00252423	0.00526485	-0.00201824	0.00340042	-0.000558815	0.00280006	0.0186828	0.00751445	0.00288927	0.0146967	0.179722	0.41373	-0.507548	-12.6332	-148.916	2.46221	0.304458	0.0137345	0.00225033	0.0205852	0.00964993	-0.0263735	-0.00337568	0.00567688	-0.000830429	0.0050267	-0.00593236	0.00404431	0.00188741	0.000123641	-9.34268e-05	-2.79367e-05	0.00154385	X16
-0.0011404	0.00637997	-0.0115688	0.00556177	-4.83094e-05	0.0162964	0.00241478	-0.0469077	-0.0226825	0.0581052	0.00200708	-0.129558	-0.364409	0.274217	1.17084	-9.88253	-197.725	-6.56778	0.0890852	-0.167969	-0.103249	-0.0387677	0.138903	0.0127785	-0.0234855	0.000860378	-0.0277142	0.026439	-0.0155075	-0.00605763	-0.000397593	0.00062742	0.000395526	-0.00475598	X17
-0.00159472	0.00117532	-0.00793118	0.00170138	-0.00710285	0.00109965	0.00428118	-0.0251521	-0.00696391	0.0579288	-0.0144436	-0.0335006	-0.141118	0.117451	0.753219	-0.0446974	-17.535	-195.084	1.20278	-1.47788	-0.129179	-0.104693	0.199915	0.03034	-0.0740367	0.0095147	-0.0160982	0.0264936	-0.0222454	-0.0155486	-0.00202495	-0.000914237	-0.0017943	-0.00732753	X18
0.000324941	0.00219628	-0.000914479	0.00149287	0.00373022	0.00618932	-0.00115946	-0.0048154	-0.00450243	-0.00974673	0.00772158	-0.0182051	-0.00951385	0.00493738	-0.0707779	-0.0155271	-1.30163	-9.46224	-152.333	2.82054	-0.0159429	0.0394027	-0.00438176	-0.00541298	0.039044	-0.00490397	-0.0149308	0.00651804	0.00148572	0.00606164	0.00128965	0.00128484	0.00162312	0.000849851	X19
-0.00112005	-0.00587775	0.00183051	-0.00339919	-0.00809237	-0.0114594	0.00494165	0.0078464	0.00911486	0.0339849	-0.0109372	0.0521949	0.0462314	-0.00341372	0.173033	-0.0339029	0.865648	1.20087	-7.42665	-201.885	0.856518	-0.0605877	-0.169367	0.0796346	-0.153933	0.0338871	0.0747264	-0.0301808	-0.00631107	-0.0252868	-0.00514834	-0.00511237	-0.00649762	-0.0038683	X20
-0.000210324	0.000990357	-0.00194854	0.000655851	-0.000885307	0.00083318	3.41371e-05	-0.00491671	-0.0020664	0.00372134	-0.0016235	-0.0108521	-0.0209662	0.00647127	0.0225243	0.0338348	-0.0660343	-0.306847	-0.853417	-4.36866	-149.443	-1.30475	0.390212	0.0290318	0.0147954	0.00277983	-0.0249966	0.0302001	-0.0168729	-0.00413637	0.000467427	0.000997286	0.000602422	-0.00411992	X21
-0.000302457	-3.45482e-05	-0.00112729	8.23456e-05	-0.00143052	-0.000539585	0.000579698	-0.00238195	-0.000393022	0.00567138	-0.00205104	-0.00235176	-0.00928614	0.0037599	0.021573	0.011562	-0.0137403	-0.0630901	-0.00325743	-0.807549	-9.55834	-155.396	2.87677	0.0288467	-0.137367	0.00284019	-0.0275658	0.0375675	-0.0261573	-0.0150532	-0.00132168	-0.000487983	-0.0011475	-0.00573421	X22
0.000767518	-0.000559395	0.00386959	-0.000498829	0.00461845	0.00226653	-0.000697592	0.00734457	0.00121738	-0.0118272	0.00655173	0.0120029	0.0318727	-0.00737932	-0.0600066	-0.042876	-0.00779051	0.152556	-0.029392	1.02089	0.391325	-2.58354	-199.116	-4.7683	2.38451	-0.108871	0.105487	-0.142952	0.129176	0.084704	0.00902395	0.00429446	0.00731305	0.0247782	X23
4.82367e-06	-0.00136813	0.00135558	-0.000862801	-0.000917177	-0.0025477	0.00028356	0.00368313	0.00220384	0.00084275	-0.00063498	0.00824687	0.0101885	-0.00298353	0.00128217	-0.0094371	0.0414994	0.0736296	0.0600403	0.048854	0.0118955	-0.796694	-2.67757	-144.246	1.14034	0.0591013	0.185837	-0.0975565	0.0389194	-0.000674484	-0.000789909	-0.00317848	-0.0026457	0.00343362	X24
-0.000332731	-0.00272989	0.00133452	-0.00162137	-0.00351082	-0.00570309	0.00107987	0.00438746	0.00363191	0.00630416	-0.00309004	0.0118677	0.0091188	-0.00336831	0.0190073	-0.00290923	0.0652118	0.0660986	0.0661153	-0.0916482	0.081139	-0.244991	-1.9734	-3.6757	-207.042	2.38056	0.884208	-0.383217	-0.0878477	-0.163703	-0.0207263	-0.0192685	-0.0223791	-0.0122138	X25
0.000216302	9.83019e-05	0.000853977	2.86847e-05	0.00157271	0.0012877	-0.000172566	0.00105579	-0.000227025	-0.00275038	0.00167604	0.00122288	0.0047928	-0.000965499	-0.0102227	-0.0051837	-0.00672175	0.00541302	-0.0102221	0.0503771	0.0394187	0.101836	-0.157503	-0.694897	-6.2437	-149.574	-1.18214	-0.0666913	0.204596	0.163713	0.0127347	0.00865189	0.00909551	0.0259886	X26
-0.0003199	0.00147869	-0.00262224	0.00101231	-0.00039241	0.00209437	0.000158376	-0.00549203	-0.00226372	0.00315684	-0.000891572	-0.00832295	-0.0131156	0.00365379	0.010048	0.0101847	-0.0275008	-0.0513072	-0.0171033	-0.0724317	-0.0673191	-0.073868	0.487273	0.294456	-2.90015	-34.1453	-199.146	10.1218	-1.64739	-0.303297	0.0307634	0.0244539	0.000591898	-0.0778048	X27
0.000453337	-2.93825e-05	0.0018573	-0.000112183	0.00246292	0.00136291	-0.000499282	0.0028778	0.000256774	-0.00521178	0.00242723	0.00299516	0.00882437	-0.00185048	-0.0158834	-0.00901459	-0.000663068	0.0214806	-0.00247151	0.066723	0.0387153	0.0723876	-0.159494	-0.087541	1.11143	-0.713946	9.41865	-211.257	4.07301	0.99554	-0.0204645	-0.00203791	0.0575186	0.13377	X28
-0.000461227	-0.000854925	-0.000756552	-0.000336144	-0.00199114	-0.00146095	0.000909623	-0.00107531	0.000357722	0.00542616	-0.00176226	0.00108174	-0.00277329	0.000578819	0.0113171	0.00299497	0.0046893	-0.0065112	0.00630935	-0.048966	-0.0168465	-0.0349994	-0.0023789	0.00398312	-0.38933	0.311543	0.746314	-46.2027	-203.94	-8.49427	-0.451203	-0.112015	-0.140921	-0.178882	X29
-0.00029669	-0.0014608	0.000390019	-0.000759548	-0.00183808	-0.00241155	0.000752023	0.00121495	0.00126915	0.00381248	-0.00138035	0.00392613	0.00183042	-0.000647234	0.00725106	-0.000113978	0.0126478	0.00818494	0.0101061	-0.0258044	-0.00154068	-0.0177457	-0.0542525	-0.0193077	-0.199586	0.124108	0.882709	-2.02156	-17.7593	-195.826	-3.90441	-0.595851	-0.165418	-0.0439479	X30
-0.000122927	5.80289e-05	-0.00058298	2.80459e-05	-0.000818737	-0.000558542	7.24629e-05	-0.000741368	-2.46862e-05	0.00122326	-0.000701553	-0.000827686	-0.00226291	0.000438262	0.0037187	0.00215906	0.0010579	-0.00350663	0.000766856	-0.011299	-0.00562313	-0.00883244	0.0167677	0.00848127	-0.0736929	0.029771	0.111835	0.184092	-2.05382	-1.86332	-148.002	-1.40124	-0.0466898	-0.128424	X31
-0.000130563	-0.000423726	-7.6425e-05	-0.000228343	-0.000869268	-0.000982133	0.000221209	0.000160302	0.000386496	0.00142448	-0.00065199	0.000819447	-0.000237652	-2.99084e-05	0.00301804	0.000634864	0.00386193	0.00133179	0.00274707	-0.0090203	-0.00215986	-0.00574201	-0.00372012	0.000212426	-0.045467	0.013543	0.111408	-0.00280176	-0.382905	-1.45087	-8.21622	-144.171	1.20292	0.124899	X32
-4.5207e-05	-7.46761e-05	-0.000131072	-4.84776e-05	-0.000399105	-0.000413943	2.92281e-05	-4.54355e-05	0.000126303	0.000459942	-0.000295939	4.07335e-05	-0.000437166	6.81337e-05	0.00129567	0.000521914	0.00133363	0.000187302	0.00101609	-0.00301658	-0.0011282	-0.00260528	0.00151964	0.00174244	-0.0151741	0.00546783	0.0199726	0.00975503	-0.0521795	-0.215868	-0.422659	-26.2022	-147.074	-2.93399	X33
-0.000223484	-0.000643754	-0.00022433	-0.000329102	-0.0014433	-0.00154207	0.000341985	0.00010917	0.000574148	0.00224313	-0.00101867	0.0010397	-0.000636718	2.189e-05	0.00457256	0.0010981	0.00495089	0.00135634	0.00365838	-0.0110884	-0.00281804	-0.0078478	-0.0028773	0.00117456	-0.0455983	0.0158177	0.0729321	-0.0114086	-0.113993	-0.424576	-0.165836	-0.749861	-0.261919	-192.371	X34
[truncated: 21 more columns]

## Sheet: LED-DNA-LS-inWater
HFLD/LED INTERACTION ENERGY (kcal/mol) MATRICES FOR THE LARGE DNA SYSTEM LS WITHOUT BACKBONES IN WATER
Electrostatic Component of Electronic Preparation Energy with Diagonal Elements being Intra-Fragment Interaction Energies
StrandX																																				StrandY
X1	X2	X3	X4	X5	X6	X7	X8	X9	X10	X11	X12	X13	X14	X15	X16	X17	X18	X19	X20	X21	X22	X23	X24	X25	X26	X27	X28	X29	X30	X31	X32	X33	X34			Y1	Y2	Y3	Y4	Y5	Y6	Y7	Y8	Y9	Y10	Y11	Y12	Y13	Y14
61.9858	0.935782	-0.0915956	0.00425259	0.0268188	0.0180729	0.00643435	-0.0026327	-0.00123715	-0.00243498	-0.00233246	-0.00153116	-0.000124435	8.15235e-05	0.000256711	0.000186875	-2.88843e-05	-0.000144455	-6.25138e-05	-0.00015371	-5.51104e-05	-3.75414e-05	4.37688e-05	7.02924e-05	0.000196941	0.000163835	6.97791e-07	2.17043e-05	-4.59971e-05	-2.63623e-05	-7.6681e-05	-5.71115e-05	2.10473e-05	5.43994e-05	X1		86.3559	1.19983	-0.0973893	0.0116985	0.0225161	0.013199	0.000258332	0.00210121	-0.00131874	-0.00241764	9.63327e-05	-0.00099535	-2.40819e-05	-7.32906e-05
	90.6063	-2.82945	-0.120611	-0.0314427	0.0528574	0.000490099	-0.0159338	-0.000495572	0.00114469	0.000125097	-0.00637414	-0.00510475	-0.000562109	-0.000606744	0.000447354	-0.00134448	-0.000904059	0.000122477	0.000141832	-0.000262988	-0.000189031	0.000458321	-9.61081e-05	-3.9412e-05	-3.05597e-06	-0.000216252	0.000445459	-7.05371e-05	4.40493e-05	2.43536e-06	-3.04875e-05	-4.31513e-05	-0.000141134	X2			89.0213	-3.05325	-0.0787761	0.0502733	0.0760412	-0.0055921	-0.0155736	-0.000856376	-0.00255235	-0.000141406	-0.00760802	-0.005955	-0.000142467
		90.1424	1.21457	0.0144771	-0.0977295	0.0265687	0.0437453	-0.00114225	-0.0035698	-0.000863805	0.00547307	0.00516982	-0.00219697	0.000315883	-0.000720749	0.00269675	0.00219121	1.75339e-05	0.000227967	0.000273919	0.000213038	-0.000926838	-0.000272035	0.00017805	1.24146e-05	0.000517626	-0.000405432	0.000333255	8.36627e-05	1.14602e-05	-5.14658e-05	3.05961e-05	0.000182203	X3				91.1781	1.15992	0.104403	-0.0705951	0.0259763	0.0461248	-0.0016502	-0.00203609	-0.000247712	0.00559382	0.00532654	-0.000232423
			86.5821	1.21463	0.0370921	0.00359645	0.0277475	-0.00429796	-0.00610718	0.00225987	-0.000506587	0.000759715	-0.000887305	-0.00124417	-0.000289457	0.0003613	0.000700507	-9.21636e-05	0.000644819	3.65273e-06	7.56871e-05	-0.0002035	-0.000103211	0.000136748	-7.91528e-05	6.66277e-05	-4.26995e-05	0.000198449	0.00015218	5.13466e-05	2.28244e-05	-1.34287e-07	5.471e-05	X4					63.8973	0.0594738	0.0294232	0.0141239	0.0260381	0.0107243	-0.000870341	0.00189813	0.000846306	-0.000696815	-0.00133278
				83.974	1.16675	-0.0311392	0.129259	-0.0237188	-0.036663	0.00917564	-0.00566891	0.00375039	-0.00342461	-0.00722565	-0.000938877	-0.000230004	0.00167851	-0.000475835	0.0022523	-3.95626e-05	0.000204242	-0.000706949	-0.000209657	0.000742644	-0.000288371	-6.44703e-06	-0.000145181	0.000556406	0.000516475	0.000164214	8.28137e-05	3.33226e-05	0.000222487	X5						82.8866	1.37903	0.141913	0.134929	-0.0137792	-0.0417575	0.0084156	-0.00598766	0.00106156	-0.00123319
					92.487	-0.0324087	0.154284	-0.0604021	-0.0669432	0.0172566	-0.0201746	-0.00341006	-0.00224856	-0.0107993	-0.000925821	-0.00339188	-0.000216063	-0.000851081	0.00256366	-0.000419221	2.58427e-05	8.32937e-05	-3.64853e-05	0.000625449	-0.000339658	-0.000474393	0.000170054	0.000387729	0.000499393	0.000172089	0.000129087	-2.30892e-05	0.000100042	X6							88.3309	0.138794	0.24052	-0.0416577	-0.0844684	0.018638	-0.023232	-0.0071152	-0.000760446
						64.3163	1.07793	-0.0503487	0.0489609	0.0108525	0.0182733	0.00883251	0.00160679	-0.0031413	-0.00171208	-0.000725594	-8.71818e-05	-0.000302017	0.000167732	0.000227489	0.000190482	-9.37537e-05	0.000160225	-0.000244134	-0.000304963	-0.00014105	-0.000253936	2.45789e-05	3.705e-05	0.000161532	0.000174081	1.65863e-05	3.91911e-05	X7								89.5005	1.03183	-0.0964226	-0.0227956	0.0067589	0.00459143	0.00482245	0.0012059
							100.529	-1.00571	-0.456558	0.0132103	0.0469502	0.0473118	-0.00356134	-0.00453039	-0.00105229	0.0058103	0.00501488	-0.000832474	0.00180074	0.000708163	0.000663823	-0.00149628	0.000291181	0.00111084	0.000154455	0.000532169	-0.000922563	0.000499124	0.000319836	-1.92827e-05	5.13108e-05	0.0001632	0.000457732	X8									93.7249	-0.976635	-0.386267	-0.00901989	0.0666848	0.053907	-0.00114441
								72.0002	0.662145	0.0110176	-0.0366449	-0.0239585	0.00478441	0.0093522	3.39163e-05	0.0014292	-0.000563403	-0.000121093	-0.000880779	-0.000203187	-7.96303e-05	0.00062647	6.51832e-05	-0.000484458	0.000237665	8.73336e-05	5.8691e-05	-0.000123436	-0.000205344	-0.000106042	-5.03457e-05	-6.40869e-05	-8.91597e-05	X9										56.6921	-0.11041	0.0329724	0.0130807	0.0092061	0.00671799
									81.0134	-0.180271	-0.145199	-0.110947	0.0313834	0.0366555	-0.00063527	-0.00338241	-0.00929746	8.20061e-05	-0.0070144	-0.000624568	-0.000692472	0.0021909	0.000452173	-0.00179896	0.000583439	-0.000290554	0.000324797	-0.00103034	-0.000972044	-0.000273532	-0.000129195	-0.000145661	-0.000355293	X10											77.6343	0.0452272	0.177387	-0.0219661	0.0386609
										56.6195	-1.12593	-0.107144	-0.00823323	-0.0298934	-0.00289918	-0.00394294	-0.00297183	-0.00129878	-0.00161608	-0.000854731	-0.000431632	0.000405473	0.000294039	0.000827011	0.000728043	-7.3076e-05	0.000100136	-0.000171319	-0.000142017	-0.000311427	-0.000226568	8.21849e-06	0.000112886	X11												71.3665	0.366834	-0.0035736	-0.00270181
											91.6941	0.618299	-0.00640835	0.1688	-0.00678449	0.056255	0.0199191	0.00399808	-0.00908643	0.00208322	0.000482222	-0.00283615	-0.00117311	-0.00131061	0.000925935	0.0022867	-0.000974412	8.08138e-05	-0.000731148	-0.000331266	-0.000383792	-5.98268e-06	5.39137e-05	X12													86.4334	1.24726	0.217841
												93.2396	-0.0374039	0.267655	-0.0220216	0.113592	0.0525129	0.00194351	-0.00025459	0.00310904	0.00171953	-0.00684043	-0.00210125	0.000432015	0.00031464	0.00271933	-0.00172355	0.00125858	0.00014038	-6.39715e-05	-0.000275137	4.85002e-05	0.000467924	X13														102.683	0.534343
													72.7208	0.946725	-0.120634	-0.0521266	-0.0190785	0.00245488	-0.00211108	-0.00102508	-0.000880011	-0.000642039	-0.0026534	-0.00158435	-0.000476287	0.000479	0.00103957	0.000188583	-4.81921e-05	0.000135772	-0.000179993	-0.000170573	-0.000376908	X14															89.6341
														93.6713	0.381457	0.133958	-0.0315457	0.00998342	-0.0422926	0.00445737	0.000789977	0.000816956	-0.000409953	-0.00697036	-0.00106693	0.00127557	-0.000417707	-0.00110894	-0.00129845	0.000347999	0.000294728	-3.14941e-05	-0.000607156	X15
															79.0936	0.256018	0.192673	0.00462489	0.0340273	0.000577528	0.00173128	0.00277745	-0.000184123	-0.000784147	-0.000748578	6.41867e-05	0.000556216	0.000662684	0.000512938	0.000220297	0.000195482	-8.34525e-05	-0.000181245	X16
																88.5222	1.50892	0.0153327	-0.0627304	0.0234173	0.00813819	-0.0214704	0.00125452	-6.84136e-05	0.000463999	0.00489342	-0.00553824	0.00062706	-0.000343797	0.000217629	0.000358024	0.000548167	0.000837217	X17
																	87.269	0.0652617	0.133183	0.0457827	0.0152747	-0.046955	9.50815e-05	0.0112291	0.00161713	0.00611948	-0.00725506	0.00259791	0.0013463	5.52415e-05	0.000259394	0.000813336	0.00169741	X18
																		78.9764	0.151851	0.0353066	0.0103773	0.0311342	0.00463954	-0.00519765	0.00267433	0.000998057	0.000341177	-0.000660272	-0.000737886	-0.000383299	2.77202e-05	-9.22232e-05	-0.000268187	X19
																			87.8062	-0.835423	-0.0324957	-0.0691298	0.000438179	0.0511958	-0.00177492	-0.0032573	-0.000186938	0.00603067	0.0057516	-0.000304419	-0.000283652	0.000673246	0.00196247	X20
																				74.7214	0.875363	0.12358	-0.00874785	-0.0216702	0.00613302	0.011148	-0.00317652	0.00185694	-0.0009045	-0.000658104	-0.000526358	-9.52497e-05	0.000193035	X21
																					78.9699	0.0280162	0.0134668	-0.00870295	0.00746192	0.0138415	-0.00557634	0.00409403	0.000766517	-0.000488031	-0.000579427	0.00013751	0.000769878	X22
																						82.6702	-0.397093	-0.462967	-0.0194101	-0.0973067	0.0511866	-0.0216712	-0.00878776	-9.49045e-06	-0.000564107	-0.00240898	-0.00524252	X23
																							59.2208	-1.04031	-0.0262307	-0.0528336	0.0225198	-0.00136996	-0.00275028	0.000912688	-0.00212929	-0.00196772	-0.00224123	X24
																								92.6399	-0.0782501	0.236693	-0.105342	0.104507	0.0543956	0.0106153	0.0027647	0.000974249	0.00723559	X25
																									63.7782	0.923127	-0.148999	-0.0414343	-0.0230786	0.0105396	0.00538937	-0.00156826	-0.00302718	X26
																										92.794	-3.35293	0.0760257	-0.0108745	0.00723674	0.00393166	0.00731359	0.0116637	X27
																											91.9056	0.262956	0.0643433	-0.000557673	0.0168358	-0.00972005	-0.0161112	X28
																												103.732	2.89102	0.13307	0.0288706	0.0296237	0.0592385	X29
																													85.4158	-0.494176	0.0131964	0.027434	0.0765479	X30
																														61.0018	0.432688	-0.10158	0.0348401	X31
																															59.4526	0.214064	-0.0575663	X32
																																84.5583	0.570593	X33
																																	83.9369	X34
Exchange Component of Electronic Preparation Energy
StrandX																																				StrandY
X1	X2	X3	X4	X5	X6	X7	X8	X9	X10	X11	X12	X13	X14	X15	X16	X17	X18	X19	X20	X21	X22	X23	X24	X25	X26	X27	X28	X29	X30	X31	X32	X33	X34			Y1	Y2	Y3	Y4	Y5	Y6	Y7	Y8	Y9	Y10	Y11	Y12	Y13	Y14
	0.147997	0.000595259	-1.20494e-05	-9.02359e-07	-1.28012e-07	-1.50602e-08	-1.25502e-09	0	0	0	0	0	0	0	0	0	0	0	0	0	0	0	0	0	0	0	0	0	0	0	0	0	0	X1			0.26546	-0.001177	-1.54443e-05	-2.75539e-06	-3.376e-07	-1.94528e-08	-1.25502e-09	0	0	0	0	0	0
		-0.0541024	-0.00104234	-4.65938e-05	-5.84149e-06	-6.15587e-07	-4.07881e-08	-1.88253e-09	0	0	0	0	0	0	0	0	0	0	0	0	0	0	0	0	0	0	0	0	0	0	0	0	0	X2				-0.102338	0.000609027	-1.58183e-05	-1.38617e-06	-2.39081e-07	-8.78513e-09	-6.27509e-10	0	0	0	0	0
			0.253181	0.00142387	-2.33339e-05	-7.05634e-06	-3.70858e-07	-1.63152e-08	-6.27509e-10	0	0	0	0	0	0	0	0	0	0	0	0	0	0	0	0	0	0	0	0	0	0	0	0	X3					0.145192	-0.000738805	-3.87129e-05	-5.10793e-06	-2.29041e-07	-1.25502e-08	-5.02008e-09	0	0	0	0
				0.115974	-0.000179594	-6.51273e-05	-5.78627e-06	-2.98695e-07	-1.81978e-08	-1.88253e-09	0	0	0	0	0	0	0	0	0	0	0	0	0	0	0	0	0	0	0	0	0	0	0	X4						-0.128016	-0.000699726	-2.59576e-05	-1.74008e-06	-9.9774e-08	-4.39257e-08	-3.13755e-09	0	0	0
					0.193246	0.000897212	-1.97785e-05	-9.68875e-07	-7.02811e-08	-8.15762e-09	-6.27509e-10	0	0	0	0	0	0	0	0	0	0	0	0	0	0	0	0	0	0	0	0	0	0	X5							-0.0706057	0.00116331	-1.8964e-05	-1.20356e-06	-5.19578e-07	-2.69829e-08	-1.88253e-09	0	0
						0.18167	0.00125727	-1.46316e-05	-1.80221e-06	-1.4119e-07	-1.19227e-08	-1.25502e-09	0	0	0	0	0	0	0	0	0	0	0	0	0	0	0	0	0	0	0	0	0	X6								0.110788	0.00215011	-1.84795e-05	-9.2451e-06	-4.7879e-07	-3.4513e-08	-3.13755e-09	0
							0.158998	0.00119913	-4.68436e-06	-5.63504e-07	-1.25502e-07	-1.31777e-08	-1.25502e-09	0	0	0	0	0	0	0	0	0	0	0	0	0	0	0	0	0	0	0	0	X7									0.268871	0.000195725	-4.41616e-05	-3.09111e-06	-2.32806e-07	-1.69428e-08	-5.64759e-09
								-0.0570923	0.000308642	-2.35454e-05	-2.53577e-06	-2.87399e-07	-3.63956e-08	-2.51004e-09	0	0	0	0	0	0	0	0	0	0	0	0	0	0	0	0	0	0	0	X8										0.051276	-0.000301638	-1.56005e-05	-2.68888e-06	-1.7382e-07	-5.83584e-08
									0.0545346	-8.56695e-05	-1.85774e-05	-2.68009e-06	-3.50778e-07	-2.94929e-08	-6.27509e-10	0	0	0	0	0	0	0	0	0	0	0	0	0	0	0	0	0	0	X9											-0.0933502	4.80151e-05	-1.01594e-05	-3.25677e-06	-6.48845e-07
										0.164784	0.00230962	-1.26136e-05	-5.74987e-06	-2.49749e-07	-2.69829e-08	-2.51004e-09	6.27509e-10	0	0	0	0	0	0	0	0	0	0	0	0	0	0	0	0	X10												0.0605996	0.00211031	-3.17721e-05	-1.04141e-05
											0.0819971	0.000968195	-2.44716e-05	-2.42972e-06	6.6516e-08	3.51405e-08	1.25502e-08	0	0	0	0	0	0	0	0	0	0	0	0	0	0	0	0	X11													0.127193	-0.000568428	-1.40857e-05
												0.128604	0.000794785	-2.25307e-05	-2.04505e-06	-1.82605e-07	-1.31777e-08	-6.27509e-10	0	0	0	0	0	0	0	0	0	0	0	0	0	0	0	X12														-0.159833	0.00259522
													0.198383	0.00262945	-3.70846e-05	-8.08044e-06	-3.13127e-07	-2.57279e-08	-2.51004e-09	0	0	0	0	0	0	0	0	0	0	0	0	0	0	X13															0.203151
														0.159991	0.000900179	-1.68034e-05	-7.49874e-07	-6.6516e-08	-8.78513e-09	-6.27509e-10	0	0	0	0	0	0	0	0	0	0	0	0	0	X14
															0.140785	0.00215396	-2.61922e-06	-3.0635e-06	-1.83233e-07	-1.88253e-08	-1.25502e-09	0	0	0	0	0	0	0	0	0	0	0	0	X15
																0.0791562	0.00121532	3.23167e-07	-2.44791e-06	-1.95783e-07	-2.25903e-08	-3.13755e-09	0	0	0	0	0	0	0	0	0	0	0	X16
																	-0.00814575	0.000330102	-2.65876e-06	-1.99234e-06	-2.18373e-07	-3.63956e-08	-2.51004e-09	0	0	0	0	0	0	0	0	0	0	X17
																		0.0935511	0.00166462	-3.71674e-06	-2.64433e-06	-3.61445e-07	-2.19628e-08	-1.88253e-09	0	0	0	0	0	0	0	0	0	X18
																			0.0936968	0.00105609	-1.33647e-05	-7.51694e-06	-4.58709e-07	-2.19628e-08	-3.13755e-09	-6.27509e-10	0	0	0	0	0	0	0	X19
																				-0.0473248	-6.38711e-05	-4.00615e-05	-2.17244e-06	-1.54367e-07	-2.57279e-08	-3.13755e-09	-6.27509e-10	0	0	0	0	0	0	X20
																					0.106936	0.00187737	-3.53413e-06	-2.17871e-06	-3.73368e-07	-5.83584e-08	-1.25502e-08	0	0	0	0	0	0	X21
																						0.111265	0.000831089	-9.01292e-06	-4.39131e-06	-4.62475e-07	-5.39658e-08	-1.88253e-09	6.27509e-10	0	0	0	0	X22
																							-0.244176	-0.00164378	-4.32687e-05	-4.94164e-06	-2.10843e-07	-4.76907e-08	-1.25502e-09	0	0	0	0	X23
																								0.030322	-4.27522e-06	-1.93662e-05	-1.16089e-06	-2.50376e-07	-8.15762e-09	-6.27509e-10	0	0	0	X24
																									0.139199	0.00122466	-3.72364e-06	-3.65775e-06	-9.53814e-08	-1.38052e-08	-6.27509e-10	0	0	X25
																										0.155255	0.000621277	-2.56978e-05	-1.40813e-06	-2.13353e-07	-6.9026e-09	-6.27509e-10	0	X26
																											0.0230143	-0.00108188	-1.50383e-05	-3.37161e-06	-1.39307e-07	-8.78513e-09	-1.25502e-09	X27
																												0.218056	0.00131454	-1.26424e-05	-4.7879e-07	-5.83584e-08	-7.53011e-09	X28
																													0.0446407	-9.85378e-06	-2.58352e-05	-4.20745e-06	-4.77535e-07	X29
																														-0.247131	-0.00167228	-6.02597e-05	-6.11947e-06	X30
																															-0.0123125	0.000140546	-1.579e-05	X31
																																0.197735	0.00074024	X32
																																	0.0651686	X33
																																		X34
Total Electronic Preparation Energy
StrandX																																				StrandY
X1	X2	X3	X4	X5	X6	X7	X8	X9	X10	X11	X12	X13	X14	X15	X16	X17	X18	X19	X20	X21	X22	X23	X24	X25	X26	X27	X28	X29	X30	X31	X32	X33	X34			Y1	Y2	Y3	Y4	Y5	Y6	Y7	Y8	Y9	Y10	Y11	Y12	Y13	Y14
61.9858	1.08378	-0.0910003	0.00424054	0.0268179	0.0180728	0.00643433	-0.0026327	-0.00123715	-0.00243498	-0.00233246	-0.00153116	-0.000124435	8.15235e-05	0.000256711	0.000186875	-2.88843e-05	-0.000144455	-6.25138e-05	-0.00015371	-5.51104e-05	-3.75414e-05	4.37688e-05	7.02924e-05	0.000196941	0.000163835	6.97791e-07	2.17043e-05	-4.59971e-05	-2.63623e-05	-7.6681e-05	-5.71115e-05	2.10473e-05	5.43994e-05	X1		86.3559	1.46529	-0.0985663	0.0116831	0.0225133	0.0131987	0.000258312	0.00210121	-0.00131874	-0.00241764	9.63327e-05	-0.00099535	-2.40819e-05	-7.32906e-05
	90.6063	-2.88355	-0.121653	-0.0314893	0.0528516	0.000489484	-0.0159339	-0.000495574	0.00114469	0.000125097	-0.00637414	-0.00510475	-0.000562109	-0.000606744	0.000447354	-0.00134448	-0.000904059	0.000122477	0.000141832	-0.000262988	-0.000189031	0.000458321	-9.61081e-05	-3.9412e-05	-3.05597e-06	-0.000216252	0.000445459	-7.05371e-05	4.40493e-05	2.43536e-06	-3.04875e-05	-4.31513e-05	-0.000141134	X2			89.0213	-3.15559	-0.0781671	0.0502575	0.0760398	-0.00559234	-0.0155736	-0.000856377	-0.00255235	-0.000141406	-0.00760802	-0.005955	-0.000142467
		90.1424	1.46776	0.015901	-0.0977529	0.0265617	0.0437449	-0.00114226	-0.0035698	-0.000863805	0.00547307	0.00516982	-0.00219697	0.000315883	-0.000720749	0.00269675	0.00219121	1.75339e-05	0.000227967	0.000273919	0.000213038	-0.000926838	-0.000272035	0.00017805	1.24146e-05	0.000517626	-0.000405432	0.000333255	8.36627e-05	1.14602e-05	-5.14658e-05	3.05961e-05	0.000182203	X3				91.1781	1.30511	0.103664	-0.0706338	0.0259712	0.0461245	-0.00165021	-0.00203609	-0.000247712	0.00559382	0.00532654	-0.000232423
			86.5821	1.3306	0.0369125	0.00353132	0.0277417	-0.00429826	-0.0061072	0.00225987	-0.000506587	0.000759715	-0.000887305	-0.00124417	-0.000289457	0.0003613	0.000700507	-9.21636e-05	0.000644819	3.65273e-06	7.56871e-05	-0.0002035	-0.000103211	0.000136748	-7.91528e-05	6.66277e-05	-4.26995e-05	0.000198449	0.00015218	5.13466e-05	2.28244e-05	-1.34287e-07	5.471e-05	X4					63.8973	-0.0685418	0.0287234	0.014098	0.0260364	0.0107242	-0.000870385	0.00189812	0.000846306	-0.000696815	-0.00133278
				83.974	1.36	-0.030242	0.129239	-0.0237198	-0.0366631	0.00917563	-0.00566891	0.00375039	-0.00342461	-0.00722565	-0.000938877	-0.000230004	0.00167851	-0.000475835	0.0022523	-3.95626e-05	0.000204242	-0.000706949	-0.000209657	0.000742644	-0.000288371	-6.44703e-06	-0.000145181	0.000556406	0.000516475	0.000164214	8.28137e-05	3.33226e-05	0.000222487	X5						82.8866	1.30842	0.143076	0.13491	-0.0137804	-0.041758	0.00841557	-0.00598766	0.00106156	-0.00123319
					92.487	0.149261	0.155542	-0.0604167	-0.066945	0.0172565	-0.0201746	-0.00341006	-0.00224856	-0.0107993	-0.000925821	-0.00339188	-0.000216063	-0.000851081	0.00256366	-0.000419221	2.58427e-05	8.32937e-05	-3.64853e-05	0.000625449	-0.000339658	-0.000474393	0.000170054	0.000387729	0.000499393	0.000172089	0.000129087	-2.30892e-05	0.000100042	X6							88.3309	0.249582	0.24267	-0.0416762	-0.0844777	0.0186376	-0.023232	-0.0071152	-0.000760446
						64.3163	1.23693	-0.0491495	0.0489562	0.0108519	0.0182732	0.0088325	0.00160679	-0.0031413	-0.00171208	-0.000725594	-8.71818e-05	-0.000302017	0.000167732	0.000227489	0.000190482	-9.37537e-05	0.000160225	-0.000244134	-0.000304963	-0.00014105	-0.000253936	2.45789e-05	3.705e-05	0.000161532	0.000174081	1.65863e-05	3.91911e-05	X7								89.5005	1.3007	-0.0962269	-0.0228397	0.0067558	0.00459119	0.00482243	0.00120589
							100.529	-1.0628	-0.456249	0.0131868	0.0469477	0.0473115	-0.00356138	-0.0045304	-0.00105229	0.0058103	0.00501488	-0.000832474	0.00180074	0.000708163	0.000663823	-0.00149628	0.000291181	0.00111084	0.000154455	0.000532169	-0.000922563	0.000499124	0.000319836	-1.92827e-05	5.13108e-05	0.0001632	0.000457732	X8									93.7249	-0.925359	-0.386569	-0.00903549	0.0666822	0.0539069	-0.00114447
								72.0002	0.716679	0.010932	-0.0366635	-0.0239612	0.00478405	0.00935217	3.39156e-05	0.0014292	-0.000563403	-0.000121093	-0.000880779	-0.000203187	-7.96303e-05	0.00062647	6.51832e-05	-0.000484458	0.000237665	8.73336e-05	5.8691e-05	-0.000123436	-0.000205344	-0.000106042	-5.03457e-05	-6.40869e-05	-8.91597e-05	X9										56.6921	-0.203761	0.0330204	0.0130706	0.00920285	0.00671735
									81.0134	-0.0154876	-0.142889	-0.110959	0.0313776	0.0366552	-0.000635297	-0.00338242	-0.00929746	8.20061e-05	-0.0070144	-0.000624568	-0.000692472	0.0021909	0.000452173	-0.00179896	0.000583439	-0.000290554	0.000324797	-0.00103034	-0.000972044	-0.000273532	-0.000129195	-0.000145661	-0.000355293	X10											77.6343	0.105827	0.179498	-0.0219979	0.0386505
										56.6195	-1.04393	-0.106176	-0.0082577	-0.0298958	-0.00289911	-0.0039429	-0.00297182	-0.00129878	-0.00161608	-0.000854731	-0.000431632	0.000405473	0.000294039	0.000827011	0.000728043	-7.3076e-05	0.000100136	-0.000171319	-0.000142017	-0.000311427	-0.000226568	8.21849e-06	0.000112886	X11												71.3665	0.494026	-0.00414203	-0.0027159
											91.6941	0.746904	-0.00561356	0.168778	-0.00678654	0.0562549	0.0199191	0.00399808	-0.00908643	0.00208322	0.000482222	-0.00283615	-0.00117311	-0.00131061	0.000925935	0.0022867	-0.000974412	8.08138e-05	-0.000731148	-0.000331266	-0.000383792	-5.98268e-06	5.39137e-05	X12													86.4334	1.08742	0.220436
												93.2396	0.160979	0.270285	-0.0220587	0.113584	0.0525126	0.00194349	-0.000254593	0.00310904	0.00171953	-0.00684043	-0.00210125	0.000432015	0.00031464	0.00271933	-0.00172355	0.00125858	0.00014038	-6.39715e-05	-0.000275137	4.85002e-05	0.000467924	X13														102.683	0.737494
													72.7208	1.10672	-0.119734	-0.0521434	-0.0190792	0.00245481	-0.00211109	-0.00102508	-0.000880011	-0.000642039	-0.0026534	-0.00158435	-0.000476287	0.000479	0.00103957	0.000188583	-4.81921e-05	0.000135772	-0.000179993	-0.000170573	-0.000376908	X14															89.6341
														93.6713	0.522242	0.136112	-0.0315483	0.00998035	-0.0422928	0.00445736	0.000789976	0.000816956	-0.000409953	-0.00697036	-0.00106693	0.00127557	-0.000417707	-0.00110894	-0.00129845	0.000347999	0.000294728	-3.14941e-05	-0.000607156	X15
															79.0936	0.335174	0.193889	0.00462521	0.0340249	0.000577332	0.00173126	0.00277745	-0.000184123	-0.000784147	-0.000748578	6.41867e-05	0.000556216	0.000662684	0.000512938	0.000220297	0.000195482	-8.34525e-05	-0.000181245	X16
																88.5222	1.50077	0.0156628	-0.0627331	0.0234153	0.00813797	-0.0214704	0.00125452	-6.84136e-05	0.000463999	0.00489342	-0.00553824	0.00062706	-0.000343797	0.000217629	0.000358024	0.000548167	0.000837217	X17
																	87.269	0.158813	0.134848	0.045779	0.0152721	-0.0469554	9.50595e-05	0.0112291	0.00161713	0.00611948	-0.00725506	0.00259791	0.0013463	5.52415e-05	0.000259394	0.000813336	0.00169741	X18
																		78.9764	0.245548	0.0363627	0.0103639	0.0311267	0.00463908	-0.00519768	0.00267433	0.000998056	0.000341177	-0.000660272	-0.000737886	-0.000383299	2.77202e-05	-9.22232e-05	-0.000268187	X19
																			87.8062	-0.882748	-0.0325596	-0.0691698	0.000436006	0.0511956	-0.00177494	-0.0032573	-0.000186939	0.00603067	0.0057516	-0.000304419	-0.000283652	0.000673246	0.00196247	X20
																				74.7214	0.982299	0.125457	-0.00875138	-0.0216724	0.00613265	0.0111479	-0.00317653	0.00185694	-0.0009045	-0.000658104	-0.000526358	-9.52497e-05	0.000193035	X21
																					78.9699	0.139281	0.0142979	-0.00871197	0.00745752	0.0138411	-0.00557639	0.00409403	0.000766517	-0.000488031	-0.000579427	0.00013751	0.000769878	X22
																						82.6702	-0.641269	-0.464611	-0.0194533	-0.0973116	0.0511863	-0.0216712	-0.00878776	-9.49045e-06	-0.000564107	-0.00240898	-0.00524252	X23
																							59.2208	-1.00999	-0.026235	-0.052853	0.0225187	-0.00137021	-0.00275029	0.000912687	-0.00212929	-0.00196772	-0.00224123	X24
																								92.6399	0.0609494	0.237917	-0.105346	0.104504	0.0543955	0.0106152	0.0027647	0.000974249	0.00723559	X25
																									63.7782	1.07838	-0.148378	-0.04146	-0.02308	0.0105394	0.00538936	-0.00156826	-0.00302718	X26
																										92.794	-3.32991	0.0749439	-0.0108895	0.00723337	0.00393152	0.00731358	0.0116637	X27
																											91.9056	0.481011	0.0656578	-0.000570316	0.0168353	-0.00972011	-0.0161112	X28
																												103.732	2.93566	0.13306	0.0288448	0.0296195	0.059238	X29
																													85.4158	-0.741308	0.0115241	0.0273737	0.0765418	X30
																														61.0018	0.420375	-0.101439	0.0348243	X31
																															59.4526	0.411799	-0.056826	X32
																																84.5583	0.635762	X33
																																	83.9369	X34
Electrostatic Component of Inter-Strand Interaction Energy
Y1	Y2	Y3	Y4	Y5	Y6	Y7	Y8	Y9	Y10	Y11	Y12	Y13	Y14	Y15	Y16	Y17	Y18	Y19	Y20	Y21	Y22	Y23	Y24	Y25	Y26	Y27	Y28	Y29	Y30	Y31	Y32	Y33	Y34
-126.478	-1.04714	-0.159252	-0.0856071	-0.194373	-0.0559017	0.0204003	-0.02614	0.00197741	0.0220615	-0.00582452	-0.00347381	-0.00856822	0.0012394	0.00768098	0.00301811	0.000989153	-0.00176377	0.000546534	-0.00316663	-0.00129023	-0.00130618	0.000928377	0.000191635	-0.00151197	0.000467065	0.000309078	0.000834761	-0.00087213	-0.000959647	-0.000279112	-0.000183832	-0.000294015	-0.000685543	X1
-11.5093	-174.612	8.18161	-0.0630253	0.389594	-0.182665	0.0198152	0.164208	0.0399166	-0.00422087	0.00790575	0.0401061	0.0309803	-0.00661913	-0.0078595	-0.00792791	0.00862225	0.00980933	0.00289678	0.00295072	0.0030381	0.00132258	-0.00504061	-0.00135575	0.000303746	-0.00065461	0.00169895	-0.00264096	0.00212647	0.0010099	0.000317193	-8.11564e-05	-0.000171731	0.000990777	X2
-0.874812	7.94728	-177.197	-1.37177	-1.91523	-0.258319	0.0515318	-0.136276	0.0187107	0.0889886	-0.021742	-0.0135772	-0.0287773	0.00582473	0.0233429	0.00913397	0.00350927	-0.00419923	0.00198853	-0.00798026	-0.00328497	-0.00324825	0.00267052	0.000701779	-0.00355525	0.00123024	0.000984387	0.00192236	-0.00202483	-0.00219323	-0.000626814	-0.000405291	-0.000631794	-0.00160222	X3
0.0732247	-0.789683	-11.1219	-128.836	-3.64325	-0.49464	0.0631768	0.0428405	0.0482847	0.0399082	-0.00161983	0.0216212	0.00834612	-0.000447692	0.00536727	-5.18492e-05	0.00663867	0.00403516	0.00239384	-0.000746273	0.000546263	-0.000349582	-0.00132788	-0.000259082	-0.00086772	0.000179048	0.00123117	-0.000616789	0.000310946	-0.000188867	-3.90756e-05	-0.000143617	-0.000245361	-0.000101618	X4
-0.00259036	-1.42903	2.10082	0.36956	-167.99	-7.45902	0.432513	0.348546	0.250515	0.219979	-0.0187033	0.104194	0.0359875	-0.00566245	0.0220107	-0.0023665	0.0245307	0.0143097	0.00856312	-0.00442413	0.00160637	-0.00164415	-0.00521812	-0.00122998	-0.00356905	0.000536338	0.00410338	-0.00201993	0.000996926	-0.000840536	-0.000188112	-0.000539268	-0.000906901	-0.000347977	X5
0.0523767	-0.382123	1.39419	-2.00903	-5.21177	-175.362	3.21029	1.36984	0.394002	0.176106	0.00641394	0.196206	0.104672	-0.0112014	0.00197459	-0.0107028	0.0324031	0.0247367	0.00923255	0.00406063	0.00557023	0.00163783	-0.00781178	-0.00151375	-0.000456976	-0.000192949	0.00436537	-0.00396676	0.00273336	0.000974377	0.00033421	-0.000208479	-0.000399659	0.000738378	X6
0.0243061	0.182087	0.082164	0.258396	1.05954	0.788609	-121.411	-1.54648	-0.0912397	-0.255245	0.0508716	-0.0703229	0.00487879	0.00819461	-0.0321746	-0.000918242	-0.0118946	-0.00274619	-0.00485671	0.00897127	0.00142293	0.00316476	0.00210499	0.000813752	0.00413261	-0.000646703	-0.00196177	-3.82448e-05	0.00046417	0.00154052	0.000409906	0.000483928	0.000779467	0.000760316	X7
-0.037861	-0.00144064	-0.242768	0.0809182	-0.615121	-1.42609	-18.4866	-180.887	2.21686	2.65483	-0.157923	-0.123496	-0.219737	0.0444475	0.106753	0.0401802	-0.00950137	-0.0279043	0.00034912	-0.0219492	-0.0101598	-0.00786093	0.00961032	0.00212194	-0.00656852	0.00229625	-0.000677791	0.00526446	-0.00466276	-0.00396198	-0.0011225	-0.000506328	-0.000757795	-0.00264496	X8
0.00190932	0.0384794	-0.0459586	0.067943	0.161875	0.526561	-0.1385	0.213773	-115.503	-2.42526	0.171223	0.0701732	0.0524282	0.0309295	-0.00902264	0.0159006	-0.00687875	-0.00415452	-0.00242304	0.00637732	-8.73663e-05	0.0013722	0.00474935	0.00177687	0.0023868	0.000370645	-0.0011675	0.00115351	-0.000756599	0.000376403	9.55427e-05	0.000293047	0.000461823	-0.000200246	X9
0.00608973	0.0826154	-0.0758477	0.107637	0.189863	0.571758	-0.249059	-2.50157	0.291992	-161.421	3.14365	-1.63115	-0.130862	0.0388176	-0.177765	0.0372589	-0.0816986	-0.0319499	-0.0215089	0.0296006	-2.34463e-05	0.00707227	0.0145347	0.00459456	0.0106235	-0.000358374	-0.00666861	0.00335415	-0.00152058	0.00239972	0.00060148	0.00116437	0.0018357	0.000410916	X10
-0.00792286	-0.00992067	-0.0303019	-0.0156695	-0.0904573	-0.0848674	0.139376	-0.255937	-0.518995	2.03652	-110.686	2.38861	0.23254	0.13012	0.209644	0.0779673	0.0263312	-0.0188696	0.00687333	-0.0221406	-0.00705565	-0.00676602	0.00685963	0.00190678	-0.00667158	0.00242259	0.00183927	0.0031933	-0.00322405	-0.00319489	-0.000851645	-0.000501341	-0.00080526	-0.00208815	X11
-0.0100079	0.0135703	-0.0598491	0.0159808	-0.0526431	0.0278569	0.0480672	-0.508272	-0.442744	2.00868	-3.31865	-172.482	-7.09405	0.327341	0.294506	0.22811	-0.150592	-0.143161	-0.0166566	-0.0463826	-0.0261951	-0.0139033	0.0292916	0.00640406	-0.00886193	0.00395422	-0.00415512	0.0107745	-0.00865853	-0.00576492	-0.00160757	-0.000363063	-0.000519913	-0.00385051	X12
-0.00884949	-0.0101656	-0.0324171	-0.00899275	-0.0793478	-0.0749261	0.0375505	-0.0702378	0.140032	1.27931	-0.859475	-6.79701	-175.05	2.98207	1.25747	0.308639	-0.0811145	-0.150671	0.034156	-0.100622	-0.0341433	-0.0257579	0.0276442	0.00676441	-0.0200796	0.00663903	0.00377563	0.00939315	-0.0088249	-0.00855616	-0.00225648	-0.00128286	-0.00192673	-0.00513881	X13
0.00114139	-0.0119342	0.0171125	-0.00991291	-0.000495845	-0.0190608	0.00917033	0.0937306	0.102818	0.134644	0.219445	0.5599	-11.8242	-119.402	-1.59547	-0.0238136	0.412139	0.263752	0.0609908	0.0237038	0.0245944	0.0044191	-0.0309136	-0.00600258	-0.000748127	-0.0013311	0.00806584	-0.00871722	0.00593148	0.00187837	0.000562259	-0.000456513	-0.000723246	0.00161166	X14
0.00301654	0.0152062	0.00370055	0.0161956	0.0495893	0.0734124	-0.0112115	-0.0566573	-0.0729566	-0.0971053	0.269848	-0.262359	-1.72776	-21.5605	-166.48	2.31315	-1.69901	-0.244515	-0.189541	0.223003	0.0071401	0.0375656	0.021077	0.00159683	0.0354174	-0.00806334	-0.0217621	0.00256513	0.00215053	0.00848405	0.00201228	0.00235584	0.00361229	0.00414448	X15
0.00124396	-0.00133084	0.00734835	-0.0015529	0.00697032	0.00205652	0.000289928	0.0215468	0.00889792	-0.00196215	0.0437746	0.257723	0.646758	-0.0263493	-4.42821	-120.526	2.7986	0.395044	0.048765	0.0573862	0.0429377	0.0255936	-0.0259102	-0.00328696	0.0103325	-0.00238848	0.0039178	-0.00730593	0.0055357	0.0039822	0.00107458	0.000382913	0.000515218	0.00220879	X16
-0.00237325	0.0079297	-0.0139643	0.0089997	0.00538024	0.0274898	0.00371742	-0.0612878	-0.0305958	0.05782	-0.00591171	-0.193001	-0.429799	0.509823	2.35004	-0.238778	-172.231	-7.28858	0.0963056	-0.235006	-0.19434	-0.0663457	0.173118	0.0233087	-0.013643	0.00402697	-0.0343438	0.0331151	-0.0209832	-0.00888543	-0.00254691	0.000501051	0.000891615	-0.00484906	X17
-0.00313662	0.00127846	-0.0118332	0.00265383	-0.00740938	0.00633216	0.00769607	-0.0343242	-0.00720373	0.0717497	-0.0217228	-0.072858	-0.218477	0.176988	1.22133	1.09073	-7.33743	-169.989	1.99549	-1.76452	-0.286415	-0.193599	0.2475	0.0345902	-0.0845781	0.0168665	-0.019162	0.0408895	-0.0302317	-0.0217504	-0.00555341	-0.00202872	-0.00289476	-0.00982008	X18
0.000130928	0.00287243	-0.0018455	0.0026184	0.00412849	0.00751907	-0.00157113	-0.00988775	-0.00786924	-0.00886719	0.00440254	-0.0301316	-0.0269593	0.0243937	0.0178962	0.162835	-1.25091	-2.61912	-123.505	3.05855	0.129964	0.0744507	0.0552426	0.0182974	0.0434806	0.000572167	-0.0181344	0.00973102	-0.00310992	0.00379522	0.000899892	0.00154604	0.00212555	0.00026745	X19
-0.00180204	-0.00745251	0.000245013	-0.00558949	-0.0122097	-0.0140781	0.00771	0.0106208	0.0172974	0.0512715	-0.00859362	0.0621281	0.0347147	-0.0241074	0.238149	0.0684113	1.25269	2.20649	0.534902	-175.092	1.50384	-0.00681957	-0.194124	0.043484	-0.231253	0.0426219	0.094845	-0.0153745	-0.00735204	-0.0305137	-0.00685363	-0.00736769	-0.0104912	-0.00890339	X20
-0.000587455	0.000525403	-0.00262195	0.000474704	-0.0019184	0.00033571	0.00100268	-0.00547789	-0.00181823	0.00663467	-0.00427397	-0.0127892	-0.0264795	0.00862225	0.0496902	0.0662142	0.0106491	-0.247287	-0.584777	0.208905	-121.93	-0.750782	0.54772	0.107335	0.0166478	0.0232804	-0.0109281	0.037577	-0.0225792	-0.0107713	-0.00224183	0.000109576	-0.000396142	-0.00596984	X21
-0.000584521	-0.000694374	-0.00139861	-0.000416383	-0.00249973	-0.00147535	0.0013722	-0.00151405	0.00108675	0.00859742	-0.00322561	-0.00102173	-0.0105956	0.00278271	0.0344235	0.0217601	0.0301322	0.00698924	0.153911	-0.778035	-4.46132	-126.931	3.29691	0.204886	-0.0958545	0.0332742	0.00566817	0.0439662	-0.0277629	-0.0218041	-0.00456256	-0.00205767	-0.00299508	-0.00778462	X22
0.00133704	-0.00101716	0.00598068	-0.000903478	0.00494924	0.000592171	-0.00169031	0.0101061	0.00282069	-0.0103678	0.00947139	0.024529	0.048254	-0.0117735	-0.0785887	-0.0746121	-0.0139414	0.220323	0.0669617	1.40309	1.22282	2.95696	-171.608	-3.30602	3.03214	-0.0560928	0.181214	-0.25004	0.172334	0.107318	0.0226587	0.00716589	0.0100719	0.0324044	X23
0.000217015	-0.00210427	0.0023492	-0.00168514	-0.00132229	-0.00383943	0.000446519	0.00656251	0.00431919	0.00238092	0.00129395	0.0155855	0.0180865	-0.00717193	-0.00594881	-0.0222351	0.0542178	0.120253	0.115098	0.179425	0.189427	-0.712911	-1.2886	-119.124	2.42895	0.278315	0.364277	-0.191848	0.105464	0.0224586	0.00614701	-0.00437626	-0.00490703	0.00731787	X24
-0.000228134	-0.00346913	0.00162109	-0.00274366	-0.00464552	-0.00717861	0.00164297	0.00725782	0.00623396	0.00833964	-0.00133469	0.0170592	0.0124979	-0.00796939	0.0159869	-0.00821243	0.0841832	0.102696	0.105542	-0.0393334	0.165546	-0.24221	-2.55071	0.464723	-178.996	3.27174	1.3048	-0.364203	0.01118	-0.129563	-0.0136013	-0.0238874	-0.0323076	-0.0172087	X25
0.000517094	0.000299473	0.00172868	0.000175999	0.00244427	0.00145904	-0.000803749	0.00165917	-0.000393688	-0.0043572	0.00273929	0.00329076	0.00921454	-0.00169467	-0.0177246	-0.011362	-0.0115085	0.0108357	-0.0134507	0.0916226	0.103459	0.236484	-0.195688	-0.490146	-0.126899	-122.867	-1.07038	-0.0631378	0.282936	0.251759	0.0457444	0.0229067	0.0216052	0.0422243	X26
-0.000559248	0.00176416	-0.00287071	0.00157464	0.000772836	0.00382666	0.000200299	-0.00676215	-0.00337644	0.00158737	-0.00152162	-0.011722	-0.014977	0.00517616	0.0108704	0.0156293	-0.0338441	-0.0602808	-0.0278135	-0.0820016	-0.0809891	-0.0731905	0.59204	0.533839	-1.93748	-16.0329	-171.379	12.2368	-1.75735	-0.325703	-0.0237351	0.0257709	0.012189	-0.0700982	X27
0.000796586	0.000565308	0.00236413	0.000315965	0.00326569	0.00172076	-0.00129492	0.00244171	-0.000456732	-0.00641911	0.00321126	0.00353675	0.0107752	-0.00151908	-0.021226	-0.0141102	-0.00973406	0.0174171	-0.00669574	0.0847488	0.0602049	0.119268	-0.105066	0.00374884	1.4509	-0.82663	11.9359	-181.151	4.34722	1.30415	0.128076	0.0501055	0.108238	0.166831	X28
-0.000803815	-0.00107063	-0.00155369	-0.000562692	-0.00264454	-0.00137349	0.0014356	-0.00148229	0.000958282	0.00701878	-0.00219864	-0.000405137	-0.00612167	0.000195819	0.0156271	0.00803285	0.00718893	-0.00755051	0.0105093	-0.0621929	-0.0285943	-0.0592935	0.00653827	0.0104898	-0.4511	0.530178	1.51302	-20.7119	-176.486	-9.2231	-0.594307	-0.147989	-0.220951	-0.274484	X29
-0.000515364	-0.00189374	-0.000134342	-0.00127885	-0.00288875	-0.00302988	0.00130022	0.00153965	0.00236004	0.00605481	-0.00142391	0.00432376	0.000101276	-0.00166705	0.0104305	0.00203723	0.0170954	0.0111354	0.0173596	-0.0344022	-0.00586376	-0.0332248	-0.0686767	-0.0371402	-0.291676	0.183019	1.27461	-0.675649	-10.9926	-170.412	-3.05886	-0.558129	-0.287123	-0.194105	X30
-0.000302237	-0.000196036	-0.000969447	-0.000149605	-0.00140172	-0.000856053	0.000465171	-0.000787834	0.000201636	0.00213848	-0.00118018	-0.00113942	-0.0034751	0.000498487	0.0064947	0.00412039	0.00384619	-0.00340666	0.00221648	-0.0194477	-0.0118392	-0.0189881	0.0128909	0.00190224	-0.115959	0.0629714	0.246867	0.477445	-2.36517	-1.34467	-122.705	-0.763934	-0.00654398	-0.237248	X31
-0.000241434	-0.000701848	-0.000286074	-0.00049681	-0.0014167	-0.00138251	0.000523652	0.000432818	0.000862472	0.00234625	-0.00079195	0.00111034	-0.000763665	-0.000353344	0.00451989	0.00144374	0.00640269	0.00300873	0.00534378	-0.0128439	-0.00462612	-0.0113751	-0.00946395	-0.00570745	-0.070491	0.0208209	0.172651	0.114466	-0.400644	-1.60054	-4.39577	-118.099	1.79941	0.145189	X32
-8.50646e-05	-0.000333081	-0.00010293	-0.00025239	-0.000722235	-0.000787769	0.00020716	0.000351562	0.000465193	0.00092656	-0.000360614	0.000619718	-0.000184005	-0.000167107	0.00193378	0.000521835	0.00335853	0.0021035	0.002799	-0.00426742	-0.001513	-0.00499611	-0.00497626	-0.0022871	-0.025622	0.00864108	0.0495463	0.0105201	0.0106473	-0.237005	0.0157761	-11.4466	-121.917	-2.15725	X33
-0.000323406	-0.000998146	-0.000392024	-0.000698929	-0.00201303	-0.00200224	0.000685064	0.000685396	0.00121758	0.00299336	-0.00102558	0.00151771	-0.000866968	-0.000447588	0.00557962	0.0016763	0.00791017	0.00410523	0.00654236	-0.0123298	-0.00431296	-0.0126097	-0.0109775	-0.00591812	-0.060425	0.0196777	0.107611	0.00551739	-0.0712337	-0.469671	-0.20364	-0.744741	0.718119	-166.747	X34
Exchange Component of Inter-Strand Interaction Energy
Y1	Y2	Y3	Y4	Y5	Y6	Y7	Y8	Y9	Y10	Y11	Y12	Y13	Y14	Y15	Y16	Y17	Y18	Y19	Y20	Y21	Y22	Y23	Y24	Y25	Y26	Y27	Y28	Y29	Y30	Y31	Y32	Y33	Y34
-20.6356	-0.00238947	-4.03288e-05	-3.22289e-06	-3.33835e-07	-3.3258e-08	-1.88253e-09	0	0	0	0	0	0	0	0	0	0	0	0	0	0	0	0	0	0	0	0	0	0	0	0	0	0	0	X1
-5.05407	-25.1764	-0.0948352	-6.01882e-05	-1.02303e-05	-1.23368e-06	-7.59286e-08	-3.76506e-09	0	0	0	0	0	0	0	0	0	0	0	0	0	0	0	0	0	0	0	0	0	0	0	0	0	0	X2
-0.0166849	-0.0208902	-25.4787	-0.00248266	-9.83376e-05	-1.31545e-05	-7.31049e-07	-4.01606e-08	-1.88253e-09	-6.27509e-10	0	0	0	0	0	0	0	0	0	0	0	0	0	0	0	0	0	0	0	0	0	0	0	0	X3
-0.00028136	-0.0162608	-4.61995	-21.0251	-0.0538462	-0.000168531	-1.24774e-05	-6.46962e-07	-3.0748e-08	-1.00402e-08	-6.27509e-10	0	0	0	0	0	0	0	0	0	0	0	0	0	0	0	0	0	0	0	0	0	0	0	X4
-1.72364e-05	-0.000164042	-0.0132747	-0.195334	-23.8493	-0.00322881	-8.07944e-05	-3.38102e-06	-1.95155e-07	-4.89457e-08	-1.88253e-09	0	0	0	0	0	0	0	0	0	0	0	0	0	0	0	0	0	0	0	0	0	0	0	X5
-1.98795e-06	-2.61082e-05	-0.000375955	-0.00883436	-2.34609	-25.0705	-0.0235389	-5.49397e-05	-3.62136e-06	-9.63855e-07	-6.21234e-08	-4.39257e-09	0	0	0	0	0	0	0	0	0	0	0	0	0	0	0	0	0	0	0	0	0	0	X6
-2.55396e-07	-2.81815e-06	-7.5399e-05	-0.000437751	-0.0261225	-2.45371	-20.0793	-0.00159911	-3.37406e-05	-9.76279e-06	-6.46962e-07	-4.70632e-08	-3.76506e-09	-6.27509e-10	0	0	0	0	0	0	0	0	0	0	0	0	0	0	0	0	0	0	0	0	X7
-1.50602e-08	-1.73193e-07	-4.48732e-06	-3.79392e-05	-0.000534078	-0.0531666	-7.73616	-25.8984	-0.00493961	-0.000146849	-1.45727e-05	-9.48167e-07	-7.59286e-08	-1.25502e-08	0	0	0	0	0	0	0	0	0	0	0	0	0	0	0	0	0	0	0	0	X8
-6.27509e-10	-7.53011e-09	-2.61671e-07	-2.25903e-06	-2.71774e-05	-0.000777641	-0.0540563	-1.33604	-19.1554	-0.0265249	-0.000267241	-9.95167e-06	-8.50275e-07	-1.4872e-07	-3.13755e-09	-6.27509e-10	0	0	0	0	0	0	0	0	0	0	0	0	0	0	0	0	0	0	X9
0	-6.27509e-10	-1.38052e-08	-1.73193e-07	-1.79656e-06	-3.36778e-05	-0.000445246	-0.00529016	-0.143771	-23.0651	-0.0348392	-0.000155245	-8.26618e-06	-1.54305e-06	-2.25903e-08	-1.88253e-09	-6.27509e-10	0	0	0	0	0	0	0	0	0	0	0	0	0	0	0	0	0	X10
0	0	-6.27509e-10	-1.56877e-08	-2.02058e-07	-2.9198e-06	-1.83038e-05	-0.000128221	-0.00529286	-1.80729	-18.2617	-0.0063039	-6.81808e-05	-1.25973e-05	-2.40964e-07	2.51004e-08	-1.88253e-09	0	0	0	0	0	0	0	0	0	0	0	0	0	0	0	0	0	X11
0	0	0	-3.13755e-09	-2.44729e-08	-1.3617e-07	-1.03916e-06	-1.90907e-05	-0.000289354	-0.0348465	-2.65451	-24.6673	-0.00299481	-0.000170895	-4.46473e-06	-2.88654e-07	-2.44729e-08	-1.25502e-09	0	0	0	0	0	0	0	0	0	0	0	0	0	0	0	0	X12
0	0	0	0	-2.51004e-09	-2.07078e-08	-1.07304e-07	-1.78338e-06	-2.2911e-05	-0.000399491	-0.0230625	-2.7753	-25.1012	-0.0869827	-0.00010216	-8.53538e-06	-9.17419e-07	-4.89457e-08	-2.51004e-09	-6.27509e-10	0	0	0	0	0	0	0	0	0	0	0	0	0	0	X13
0	0	0	0	0	-2.51004e-09	-1.19227e-08	-1.8135e-07	-3.3829e-06	-5.77924e-05	-0.000682299	-0.0533473	-6.30401	-19.6418	-0.0030752	-2.985e-05	-3.90248e-06	-1.83233e-07	-1.50602e-08	-1.88253e-09	0	0	0	0	0	0	0	0	0	0	0	0	0	0	X14
0	0	0	0	0	0	-1.25502e-09	-1.25502e-08	-2.88027e-07	-4.27271e-06	-4.49673e-05	-0.00101917	-0.154749	-8.50123	-23.7747	-0.00295608	-9.21485e-05	-5.97703e-06	-4.02861e-07	-6.02409e-08	-1.88253e-09	0	0	0	0	0	0	0	0	0	0	0	0	0	X15
0	0	0	0	0	0	0	-6.27509e-10	-2.63554e-08	-3.2254e-07	-2.7623e-06	-3.19622e-05	-0.00156274	-0.0545228	-3.01474	-20.0234	-0.0169794	-6.18931e-05	-7.60102e-06	-8.00075e-07	-3.01205e-08	-2.51004e-09	0	0	0	0	0	0	0	0	0	0	0	0	X16
0	0	0	0	0	0	0	0	-2.51004e-09	-2.57279e-08	-2.33434e-07	-2.33308e-06	-8.04875e-05	-0.000596028	-0.0305156	-3.08786	-24.7092	-0.0029046	-4.92658e-05	-1.15198e-05	-4.36747e-07	-3.38855e-08	-3.13755e-09	-6.27509e-10	0	0	0	0	0	0	0	0	0	0	X17
0	0	0	0	0	0	0	0	0	-1.88253e-09	-1.69428e-08	-1.3868e-07	-3.42244e-06	-3.08302e-05	-0.000484862	-0.0361785	-3.42213	-24.3075	-0.00239227	-0.000108255	-7.67444e-06	-4.67495e-07	-4.70632e-08	-7.53011e-09	-6.27509e-10	0	0	0	0	0	0	0	0	0	X18
0	0	0	0	0	0	0	0	0	0	-1.25502e-09	-8.15762e-09	-2.52259e-07	-1.50477e-06	-2.55993e-05	-0.000547787	-0.0286863	-2.39548	-20.3636	-0.0168863	-6.70732e-05	-8.52095e-06	-1.04104e-06	-2.07078e-07	-1.25502e-08	-2.51004e-09	0	0	0	0	0	0	0	0	X19
0	0	0	0	0	0	0	0	0	0	0	-6.27509e-10	-2.88654e-08	-1.88253e-07	-2.14545e-06	-4.43718e-05	-0.000363351	-0.0234525	-2.49777	-24.9963	-0.00227603	-6.50068e-05	-8.48958e-06	-1.4872e-06	-1.11069e-07	-1.38052e-08	-6.27509e-10	0	0	0	0	0	0	0	X20
0	0	0	0	0	0	0	0	0	0	0	0	-1.25502e-09	-9.41264e-09	-1.12952e-07	-1.93775e-06	-1.83126e-05	-0.000288247	-0.0197091	-1.1304	-20.0219	-0.0110844	-0.000147584	-2.41146e-05	-2.48933e-06	-2.29668e-07	0	6.27509e-10	0	0	0	0	0	0	X21
0	0	0	0	0	0	0	0	0	0	0	0	0	-6.27509e-10	-1.00402e-08	-2.61671e-07	-1.81413e-06	-2.38316e-05	-0.000343893	-0.0114889	-1.4833	-20.8188	-0.0192576	-0.000439418	-2.6602e-05	-2.70394e-06	3.82781e-08	-8.78513e-09	6.27509e-10	0	0	0	0	0	X22
0	0	0	0	0	0	0	0	0	0	0	0	0	6.27509e-10	-4.39257e-09	-8.47138e-08	-3.76506e-08	-2.36006e-06	-4.55321e-05	-0.000212253	-0.0112801	-1.29527	-24.5397	-0.080887	-0.000246948	-1.95519e-05	-6.78965e-07	-7.46736e-08	-1.25502e-09	0	0	0	0	0	X23
0	0	0	0	0	0	0	0	0	0	0	0	0	0	0	-5.64759e-09	-6.9026e-09	-1.16717e-07	-2.17746e-06	-1.87588e-05	-0.000289421	-0.0160249	-0.236112	-19.7336	-0.0058943	-0.000177103	-4.75652e-06	-5.54091e-07	-9.41264e-09	-6.27509e-10	0	0	0	0	X24
0	0	0	0	0	0	0	0	0	0	0	0	0	0	0	0	-6.27509e-10	-7.53011e-09	-1.38052e-07	-1.2638e-06	-1.78859e-05	-0.000233202	-0.00646871	-1.03335	-25.7704	-0.0409885	-6.97885e-05	-8.24171e-06	-1.37425e-07	-1.12952e-08	-1.88253e-09	0	0	0	X25
0	0	0	0	0	0	0	0	0	0	0	0	0	0	0	0	0	-6.27509e-10	-1.12952e-08	-1.29267e-07	-2.1191e-06	-2.36025e-05	-0.0003306	-0.0189627	-1.81919	-20.1716	-0.00296944	-6.05013e-05	-2.25464e-06	-1.97038e-07	-3.2003e-08	-3.76506e-09	0	0	X26
0	0	0	0	0	0	0	0	0	0	0	0	0	0	0	0	0	0	-1.25502e-09	-8.15762e-09	-1.97665e-07	-1.97226e-06	-3.22069e-05	-0.000527213	-0.0471036	-6.73899	-24.602	-0.0157174	-3.6986e-05	-3.41302e-06	-5.04518e-07	-6.08684e-08	-1.88253e-09	-6.27509e-10	X27
0	0	0	0	0	0	0	0	0	0	0	0	0	0	0	0	0	0	0	-6.27509e-10	-1.06677e-08	-1.02284e-07	-1.57693e-06	-1.78382e-05	-0.000460667	-0.0257847	-0.190071	-25.8986	-0.00110092	-2.12719e-05	-3.49397e-06	-4.28589e-07	-1.63152e-08	-3.13755e-09	X28
0	0	0	0	0	0	0	0	0	0	0	0	0	0	0	0	0	0	0	0	-1.88253e-09	-1.81978e-08	-2.59789e-07	-2.41277e-06	-4.78219e-05	-0.000529455	-0.0445473	-9.77784	-25.3294	-0.00632326	-0.000182344	-2.47113e-05	-1.4621e-06	-1.54367e-07	X29
0	0	0	0	0	0	0	0	0	0	0	0	0	0	0	0	0	0	0	0	0	-6.27509e-10	-1.12952e-08	-8.53413e-08	-1.48594e-06	-2.05804e-05	-0.000598893	-0.0528589	-2.55822	-24.2491	-0.0788613	-0.000417652	-1.55566e-05	-1.69114e-06	X30
0	0	0	0	0	0	0	0	0	0	0	0	0	0	0	0	0	0	0	0	0	0	-1.88253e-09	-1.19227e-08	-1.60015e-07	-1.93587e-06	-2.69704e-05	-0.00039934	-0.012457	-0.0413167	-20.2201	-0.0195346	-6.15662e-05	-6.91453e-06	X31
0	0	0	0	0	0	0	0	0	0	0	0	0	0	0	0	0	0	0	0	0	0	0	0	-5.02008e-09	-7.15361e-08	-9.79542e-07	-2.33804e-05	-0.000215719	-0.00224218	-1.16825	-19.5078	-0.00183666	-4.39376e-05	X32
0	0	0	0	0	0	0	0	0	0	0	0	0	0	0	0	0	0	0	0	0	0	0	0	-6.27509e-10	-6.27509e-09	-8.78513e-08	-1.67106e-06	-2.28119e-05	-0.000169785	-0.026799	-5.53743	-20.0513	-0.031872	X33
0	0	0	0	0	0	0	0	0	0	0	0	0	0	0	0	0	0	0	0	0	0	0	0	0	-6.27509e-10	-1.00402e-08	-1.62525e-07	-1.86308e-06	-1.689e-05	-0.000228377	-0.0171993	-0.0888585	-23.674	X34
Dispersion Component of Inter-Strand Interaction Energy
Y1	Y2	Y3	Y4	Y5	Y6	Y7	Y8	Y9	Y10	Y11	Y12	Y13	Y14	Y15	Y16	Y17	Y18	Y19	Y20	Y21	Y22	Y23	Y24	Y25	Y26	Y27	Y28	Y29	Y30	Y31	Y32	Y33	Y34
-7.59148	-0.200765	-0.0349449	-0.00672264	-0.00219593	-0.000728525	-0.000272704	-8.95513e-05	-4.59362e-05	-2.84218e-05	-1.50257e-05	-9.01731e-06	-5.52585e-06	-3.59124e-06	-1.82417e-06	-1.37299e-06	-8.48393e-07	-5.84839e-07	-4.67495e-07	-3.0497e-07	-2.49749e-07	-1.87625e-07	-1.28012e-07	-1.28012e-07	-1.03539e-07	-7.84387e-08	-4.83182e-08	-5.14558e-08	-3.0748e-08	-2.57279e-08	-2.63554e-08	-2.19628e-08	-1.56877e-08	-1.56877e-08	X1
-8.79816	-9.06044	-1.01051	-0.0351327	-0.00972764	-0.00249391	-0.000869297	-0.000272732	-0.000133284	-7.44245e-05	-3.63723e-05	-2.02943e-05	-1.16127e-05	-7.13729e-06	-3.41804e-06	-2.50125e-06	-1.52548e-06	-1.04104e-06	-8.2392e-07	-5.25853e-07	-4.23569e-07	-3.11872e-07	-2.08333e-07	-2.05196e-07	-1.63152e-07	-1.22992e-07	-7.53011e-08	-7.84387e-08	-4.70632e-08	-3.89056e-08	-4.01606e-08	-3.26305e-08	-2.32179e-08	-2.25903e-08	X2
-0.222515	-0.678337	-8.9581	-0.206101	-0.0412936	-0.00723698	-0.00212537	-0.000579454	-0.000248858	-0.000124162	-5.55628e-05	-2.86998e-05	-1.53539e-05	-8.99786e-06	-4.11207e-06	-2.92482e-06	-1.74636e-06	-1.16278e-06	-8.96084e-07	-5.60366e-07	-4.44277e-07	-3.21912e-07	-2.10843e-07	-2.03941e-07	-1.60642e-07	-1.19854e-07	-7.27911e-08	-7.53011e-08	-4.45532e-08	-3.63956e-08	-3.76506e-08	-3.01205e-08	-2.13353e-08	-2.07078e-08	X3
-0.036518	-0.218208	-8.38087	-7.61826	-1.00099	-0.0538707	-0.0103213	-0.00219593	-0.000868484	-0.000379799	-0.000158067	-7.57504e-05	-3.79047e-05	-2.07511e-05	-8.82718e-06	-5.92557e-06	-3.42369e-06	-2.21323e-06	-1.67733e-06	-1.03476e-06	-8.0886e-07	-5.76054e-07	-3.69603e-07	-3.52033e-07	-2.72967e-07	-2.00176e-07	-1.19227e-07	-1.22364e-07	-7.21636e-08	-5.83584e-08	-5.96134e-08	-4.76907e-08	-3.3258e-08	-3.26305e-08	X4
-0.0051712	-0.0226142	-0.285514	-1.00573	-8.62249	-0.269638	-0.0400363	-0.00628424	-0.00218213	-0.000796616	-0.000297921	-0.000129276	-5.94132e-05	-3.03269e-05	-1.2013e-05	-7.60793e-06	-4.22565e-06	-2.65248e-06	-1.97728e-06	-1.19478e-06	-9.12399e-07	-6.36922e-07	-4.02234e-07	-3.77133e-07	-2.86772e-07	-2.07078e-07	-1.21109e-07	-1.23619e-07	-7.21636e-08	-5.83584e-08	-5.83584e-08	-4.64357e-08	-3.2003e-08	-3.13755e-08	X5
-0.00123523	-0.0042386	-0.0362338	-0.189661	-4.90319	-8.86874	-0.529953	-0.031809	-0.00782701	-0.00235444	-0.000795966	-0.000312468	-0.000133297	-6.3364e-05	-2.3108e-05	-1.35134e-05	-7.07266e-06	-4.18235e-06	-2.99699e-06	-1.77648e-06	-1.33848e-06	-9.20556e-07	-5.69151e-07	-5.25853e-07	-3.94076e-07	-2.79242e-07	-1.60642e-07	-1.6127e-07	-9.22439e-08	-7.40461e-08	-7.40461e-08	-5.83584e-08	-4.01606e-08	-3.82781e-08	X6
-0.000430497	-0.00117476	-0.00672497	-0.0307133	-0.339787	-4.5393	-7.5007	-0.173556	-0.0334714	-0.00813321	-0.00251574	-0.00088835	-0.000348814	-0.000153432	-5.0908e-05	-2.73155e-05	-1.34676e-05	-7.50564e-06	-5.14181e-06	-2.96561e-06	-2.2057e-06	-1.49473e-06	-9.07379e-07	-8.22665e-07	-6.06802e-07	-4.22314e-07	-2.38454e-07	-2.35316e-07	-1.32405e-07	-1.04794e-07	-1.04167e-07	-8.15762e-08	-5.58483e-08	-5.33383e-08	X7
-0.000186663	-0.000399894	-0.00178195	-0.00699387	-0.0508799	-0.566772	-11.073	-9.01502	-0.323435	-0.0507617	-0.0102543	-0.00285201	-0.00099099	-0.000427982	-0.00013765	-6.88422e-05	-3.08678e-05	-1.57618e-05	-9.94163e-06	-5.46498e-06	-3.85542e-06	-2.56463e-06	-1.53928e-06	-1.38303e-06	-1.00527e-06	-6.90888e-07	-3.84036e-07	-3.72741e-07	-2.05196e-07	-1.59387e-07	-1.56877e-07	-1.21737e-07	-8.28313e-08	-7.78112e-08	X8
-8.23807e-05	-0.000149596	-0.000546598	-0.00161997	-0.00769013	-0.0511165	-0.474469	-3.4576	-7.31964	-0.782162	-0.0707373	-0.0115534	-0.00301637	-0.00115305	-0.000327053	-0.000148237	-6.10178e-05	-2.88667e-05	-1.70306e-05	-8.85541e-06	-5.94251e-06	-3.81777e-06	-2.23268e-06	-1.96285e-06	-1.39495e-06	-9.44402e-07	-5.15813e-07	-4.9134e-07	-2.66692e-07	-2.03941e-07	-1.98921e-07	-1.51857e-07	-1.02284e-07	-9.53814e-08	X9
-3.16177e-05	-5.05804e-05	-0.000160968	-0.000387458	-0.00141905	-0.00625013	-0.0357561	-0.182846	-1.04758	-8.55484	-0.591118	-0.0492064	-0.00865083	-0.00294505	-0.00073457	-0.000295488	-0.000108356	-4.63334e-05	-2.5096e-05	-1.22465e-05	-7.69327e-06	-4.74899e-06	-2.69766e-06	-2.32241e-06	-1.6127e-06	-1.07304e-06	-5.75426e-07	-5.39658e-07	-2.87399e-07	-2.16491e-07	-2.06451e-07	-1.55622e-07	-1.03539e-07	-9.6009e-08	X10
-1.85661e-05	-2.66108e-05	-7.51606e-05	-0.000150047	-0.000455874	-0.00152102	-0.00599237	-0.0257853	-0.153849	-3.80649	-7.02737	-0.359262	-0.0355689	-0.0111364	-0.00254279	-0.000943973	-0.000306578	-0.000117155	-5.6922e-05	-2.55108e-05	-1.46454e-05	-8.55672e-06	-4.68122e-06	-3.94327e-06	-2.6688e-06	-1.74761e-06	-9.25577e-07	-8.50275e-07	-4.43649e-07	-3.28187e-07	-3.06852e-07	-2.27786e-07	-1.49347e-07	-1.36797e-07	X11
-1.04367e-05	-1.39539e-05	-3.6051e-05	-6.12713e-05	-0.000165972	-0.000448957	-0.00142547	-0.00505001	-0.0304115	-0.383586	-4.64611	-8.79443	-0.255062	-0.0506331	-0.00721904	-0.0023042	-0.000689556	-0.000243961	-0.000109874	-4.48318e-05	-2.36979e-05	-1.28489e-05	-6.63529e-06	-5.3583e-06	-3.50276e-06	-2.24899e-06	-1.17219e-06	-1.05422e-06	-5.45306e-07	-3.97841e-07	-3.67093e-07	-2.66692e-07	-1.70683e-07	-1.54995e-07	X12
-6.41377e-06	-8.24485e-06	-1.98569e-05	-3.01976e-05	-7.36991e-05	-0.00016772	-0.000429594	-0.00116503	-0.0054268	-0.0394451	-0.325402	-5.33799	-8.82616	-0.812921	-0.0399818	-0.0083364	-0.00220749	-0.000693736	-0.000287153	-0.000105175	-5.11251e-05	-2.53702e-05	-1.21473e-05	-9.20619e-06	-5.72351e-06	-3.54668e-06	-1.79028e-06	-1.57317e-06	-8.05095e-07	-5.77309e-07	-5.2397e-07	-3.73996e-07	-2.34689e-07	-2.10216e-07	X13
-4.5689e-06	-5.75238e-06	-1.31193e-05	-1.85937e-05	-4.16102e-05	-8.39514e-05	-0.00018403	-0.000401695	-0.00151271	-0.00722565	-0.042021	-0.438824	-7.07061	-7.33485	-0.20413	-0.0355923	-0.00860683	-0.00236936	-0.000880929	-0.000284525	-0.000123969	-5.57404e-05	-2.47157e-05	-1.76776e-05	-1.03959e-05	-6.19038e-06	-3.01895e-06	-2.58785e-06	-1.30773e-06	-9.23694e-07	-8.22665e-07	-5.77309e-07	-3.54543e-07	-3.11245e-07	X14
-3.65399e-06	-4.58709e-06	-1.01562e-05	-1.4043e-05	-2.96178e-05	-5.48387e-05	-0.000105561	-0.000187767	-0.000576115	-0.00216894	-0.00926171	-0.065955	-0.887637	-11.9025	-8.59104	-0.266422	-0.0366137	-0.0068497	-0.00228844	-0.000737621	-0.000330479	-0.000142338	-5.78746e-05	-3.81582e-05	-2.12148e-05	-1.17915e-05	-5.3583e-06	-4.4685e-06	-2.16805e-06	-1.51795e-06	-1.33158e-06	-9.23694e-07	-5.68524e-07	-4.92595e-07	X15
-2.28162e-06	-2.78928e-06	-5.97389e-06	-8.06287e-06	-1.61653e-05	-2.8472e-05	-5.08509e-05	-8.06161e-05	-0.000209181	-0.000652124	-0.00206046	-0.00918504	-0.0659214	-0.510762	-4.95259	-7.50368	-0.462769	-0.03606	-0.00751811	-0.00208461	-0.000819711	-0.000321991	-0.000119376	-7.32203e-05	-3.80126e-05	-1.98619e-05	-8.48958e-06	-6.79405e-06	-3.13943e-06	-2.14169e-06	-1.83609e-06	-1.24937e-06	-7.58659e-07	-6.43825e-07	X16
-1.58258e-06	-1.89006e-06	-3.93637e-06	-5.22402e-06	-1.00402e-05	-1.69823e-05	-2.84607e-05	-4.10699e-05	-9.31419e-05	-0.000252313	-0.000638856	-0.00211756	-0.00958992	-0.0509337	-0.387609	-5.12955	-8.86801	-0.249922	-0.0285925	-0.00677891	-0.0023329	-0.000857886	-0.000291044	-0.000165628	-7.98876e-05	-3.88397e-05	-1.54242e-05	-1.17062e-05	-5.07153e-06	-3.3509e-06	-2.80559e-06	-1.87061e-06	-1.1245e-06	-9.35617e-07	X17
-1.07492e-06	-1.24874e-06	-2.52886e-06	-3.28501e-06	-6.11634e-06	-1.00339e-05	-1.6159e-05	-2.20877e-05	-4.56068e-05	-0.000112049	-0.000240976	-0.000640506	-0.00210068	-0.00764931	-0.0405198	-0.377855	-5.8698	-8.78107	-0.255854	-0.0353381	-0.00761313	-0.0024213	-0.000738446	-0.000387815	-0.000170643	-7.77503e-05	-2.88987e-05	-2.05032e-05	-8.32015e-06	-5.24033e-06	-4.25765e-06	-2.75602e-06	-1.61207e-06	-1.314e-06	X18
-7.26028e-07	-8.22037e-07	-1.62023e-06	-2.04631e-06	-3.70356e-06	-5.89357e-06	-9.18046e-06	-1.20877e-05	-2.34751e-05	-5.35705e-05	-0.000103296	-0.000237234	-0.000623518	-0.0017423	-0.00603771	-0.0387107	-0.33154	-4.57236	-7.5054	-0.476033	-0.0387704	-0.00839971	-0.0021569	-0.00100386	-0.000387702	-0.000163755	-5.64363e-05	-3.70576e-05	-1.41246e-05	-8.40549e-06	-6.56312e-06	-4.09638e-06	-2.30421e-06	-1.83421e-06	X19
-5.42168e-07	-5.96134e-07	-1.14709e-06	-1.40939e-06	-2.48368e-06	-3.85416e-06	-5.84211e-06	-7.48493e-06	-1.38742e-05	-2.96003e-05	-5.20965e-05	-0.000106768	-0.000236704	-0.000538902	-0.00140201	-0.00656364	-0.0377147	-0.358227	-4.58428	-8.88011	-0.244672	-0.0348597	-0.00736701	-0.00307028	-0.001024	-0.00040508	-0.000130033	-7.81406e-05	-2.76794e-05	-1.53583e-05	-1.13573e-05	-6.77397e-06	-3.64897e-06	-2.83258e-06	X20
-3.79016e-07	-4.06626e-07	-7.68699e-07	-9.16791e-07	-1.57693e-06	-2.37512e-06	-3.50339e-06	-4.36558e-06	-7.85767e-06	-1.58961e-05	-2.64232e-05	-5.03878e-05	-0.00010024	-0.000197106	-0.000406782	-0.0014575	-0.0055001	-0.0351024	-0.278605	-3.36195	-7.5169	-0.450078	-0.0484925	-0.013345	-0.00323093	-0.00110568	-0.00031164	-0.000167638	-5.5303e-05	-2.86295e-05	-1.97709e-05	-1.11427e-05	-5.67457e-06	-4.28087e-06	X21
-2.84262e-07	-2.98695e-07	-5.53463e-07	-6.41315e-07	-1.07994e-06	-1.57944e-06	-2.26845e-06	-2.76041e-06	-4.86257e-06	-9.42519e-06	-1.4983e-05	-2.70042e-05	-4.94377e-05	-8.69615e-05	-0.000151108	-0.000439892	-0.00127471	-0.0056513	-0.0346554	-0.266181	-3.3849	-7.73221	-0.520279	-0.0847146	-0.012178	-0.00351311	-0.000859508	-0.000405777	-0.000124494	-5.94139e-05	-3.78407e-05	-1.98883e-05	-9.45218e-06	-6.8819e-06	X22
-2.27158e-07	-2.35944e-07	-4.27961e-07	-4.83182e-07	-7.97565e-07	-1.13454e-06	-1.58446e-06	-1.88065e-06	-3.24799e-06	-6.08998e-06	-9.37813e-06	-1.62255e-05	-2.80296e-05	-4.53758e-05	-6.92545e-05	-0.000170511	-0.000403193	-0.0013687	-0.00626007	-0.0342897	-0.286288	-3.46767	-8.80821	-1.14219	-0.0663098	-0.0138521	-0.00272725	-0.00111124	-0.000320891	-0.000141448	-8.20607e-05	-3.97571e-05	-1.74284e-05	-1.21097e-05	X23
-1.51857e-07	-1.55622e-07	-2.77359e-07	-3.08107e-07	-5.00125e-07	-7.00301e-07	-9.58207e-07	-1.11508e-06	-1.8819e-06	-3.42808e-06	-5.14119e-06	-8.6019e-06	-1.4225e-05	-2.1853e-05	-3.10517e-05	-6.9887e-05	-0.000146928	-0.000420415	-0.00156024	-0.00591894	-0.0347106	-0.221595	-1.45246	-7.46631	-0.335109	-0.0531945	-0.00778114	-0.00256207	-0.00065641	-0.000258114	-0.00013589	-6.06802e-05	-2.47069e-05	-1.63027e-05	X24
-1.05422e-07	-1.07304e-07	-1.8888e-07	-2.07706e-07	-3.3007e-07	-4.51807e-07	-6.02409e-07	-6.79593e-07	-1.12324e-06	-1.98732e-06	-2.91855e-06	-4.77284e-06	-7.70393e-06	-1.13968e-05	-1.51726e-05	-3.04581e-05	-5.59588e-05	-0.000132997	-0.00040614	-0.00122145	-0.00578069	-0.0301715	-0.209247	-3.15331	-8.96249	-0.668744	-0.0346369	-0.00825215	-0.00175325	-0.000642246	-0.000301658	-0.000122627	-4.6612e-05	-2.84481e-05	X25
-9.03614e-08	-9.16164e-08	-1.60015e-07	-1.73193e-07	-2.71084e-07	-3.63328e-07	-4.73142e-07	-5.20205e-07	-8.40863e-07	-1.45519e-06	-2.08208e-06	-3.31513e-06	-5.21962e-06	-7.50941e-06	-9.55822e-06	-1.77598e-05	-2.94741e-05	-6.13315e-05	-0.000160212	-0.000395483	-0.00150016	-0.00581083	-0.0301256	-0.267059	-3.76564	-7.34056	-0.207712	-0.0401988	-0.00676849	-0.00221392	-0.000901975	-0.000325984	-0.000112412	-6.28865e-05	X26
-8.53413e-08	-8.59688e-08	-1.48092e-07	-1.60642e-07	-2.48494e-07	-3.3007e-07	-4.22941e-07	-4.53062e-07	-7.09086e-07	-1.20105e-06	-1.67482e-06	-2.59852e-06	-4.0192e-06	-5.74359e-06	-7.26154e-06	-1.30704e-05	-2.03125e-05	-3.79838e-05	-8.41848e-05	-0.000174652	-0.000536171	-0.00175018	-0.00708209	-0.0512857	-0.535545	-10.3359	-8.85242	-0.783515	-0.0277046	-0.00683509	-0.00261658	-0.000889816	-0.000310003	-0.000154073	X27
-5.08283e-08	-5.08283e-08	-8.65963e-08	-9.28714e-08	-1.42445e-07	-1.8637e-07	-2.35944e-07	-2.48494e-07	-3.80271e-07	-6.35667e-07	-8.66591e-07	-1.30898e-06	-1.97101e-06	-2.75979e-06	-3.39106e-06	-5.90675e-06	-8.74121e-06	-1.53451e-05	-3.13196e-05	-5.85868e-05	-0.000155831	-0.000423434	-0.00130829	-0.00637991	-0.0383982	-0.294591	-1.23435	-8.93366	-0.143264	-0.0250829	-0.00708262	-0.00200182	-0.000614285	-0.000265811	X28
-5.33383e-08	-5.27108e-08	-8.91063e-08	-9.53814e-08	-1.44327e-07	-1.87625e-07	-2.35316e-07	-2.44729e-07	-3.67721e-07	-6.02409e-07	-7.9882e-07	-1.17093e-06	-1.70934e-06	-2.34249e-06	-2.82693e-06	-4.87763e-06	-7.02434e-06	-1.18944e-05	-2.26468e-05	-3.81595e-05	-8.59305e-05	-0.000193189	-0.000476094	-0.00181311	-0.00751196	-0.0436962	-0.376928	-13.5679	-8.81562	-0.351945	-0.0592751	-0.0105983	-0.00243217	-0.000915246	X29
-4.26706e-08	-4.14156e-08	-6.96536e-08	-7.34186e-08	-1.10442e-07	-1.42445e-07	-1.7633e-07	-1.81978e-07	-2.69202e-07	-4.33609e-07	-5.62876e-07	-8.0635e-07	-1.1452e-06	-1.52799e-06	-1.79091e-06	-3.02083e-06	-4.23443e-06	-6.95218e-06	-1.26908e-05	-1.9968e-05	-4.08565e-05	-8.10152e-05	-0.000168921	-0.000524752	-0.00163256	-0.00630693	-0.0352528	-0.515926	-4.71043	-8.70283	-1.15664	-0.0788116	-0.00964997	-0.00296984	X30
-2.88654e-08	-2.82379e-08	-4.64357e-08	-4.89457e-08	-7.27911e-08	-9.28714e-08	-1.14207e-07	-1.16717e-07	-1.70683e-07	-2.69202e-07	-3.41993e-07	-4.813e-07	-6.71435e-07	-8.76631e-07	-1.00527e-06	-1.66353e-06	-2.26845e-06	-3.60504e-06	-6.32843e-06	-9.39382e-06	-1.7837e-05	-3.23268e-05	-6.03551e-05	-0.000165437	-0.00043054	-0.00129637	-0.00467318	-0.0369743	-0.181194	-0.676054	-7.57954	-0.575526	-0.0393037	-0.00889634	X31
-2.38454e-08	-2.32179e-08	-3.76506e-08	-3.89056e-08	-5.83584e-08	-7.40461e-08	-8.97339e-08	-9.16164e-08	-1.33032e-07	-2.07078e-07	-2.59161e-07	-3.58308e-07	-4.86947e-07	-6.19352e-07	-6.89633e-07	-1.12638e-06	-1.51481e-06	-2.37073e-06	-4.09575e-06	-5.88102e-06	-1.0588e-05	-1.76751e-05	-2.96285e-05	-7.2606e-05	-0.000162917	-0.00040865	-0.00118853	-0.00664259	-0.0294653	-0.14365	-2.70975	-7.43311	-0.165454	-0.0337565	X32
-2.32179e-08	-2.19628e-08	-3.5768e-08	-3.63956e-08	-5.39658e-08	-6.7771e-08	-8.22037e-08	-8.28313e-08	-1.19227e-07	-1.8386e-07	-2.29668e-07	-3.13755e-07	-4.19176e-07	-5.2146e-07	-5.63504e-07	-8.92946e-07	-1.17407e-06	-1.79907e-06	-3.07856e-06	-4.34864e-06	-7.71774e-06	-1.24027e-05	-1.94622e-05	-4.38886e-05	-8.8167e-05	-0.000186751	-0.000422543	-0.00184023	-0.00646725	-0.0328651	-0.397829	-9.26976	-7.52294	-0.869603	X33
-1.50602e-08	-1.44327e-08	-2.32179e-08	-2.32179e-08	-3.38855e-08	-4.20431e-08	-5.08283e-08	-5.08283e-08	-7.27911e-08	-1.10442e-07	-1.36797e-07	-1.85115e-07	-2.42846e-07	-2.95557e-07	-3.11245e-07	-4.80045e-07	-6.18097e-07	-9.27459e-07	-1.55873e-06	-2.14608e-06	-3.70921e-06	-5.74171e-06	-8.48958e-06	-1.78093e-05	-3.2911e-05	-6.18436e-05	-0.000117455	-0.000417635	-0.0011298	-0.00429917	-0.0301787	-0.25783	-0.83426	-8.57295	X34
Total Inter-Strand Interaction Energy
Y1	Y2	Y3	Y4	Y5	Y6	Y7	Y8	Y9	Y10	Y11	Y12	Y13	Y14	Y15	Y16	Y17	Y18	Y19	Y20	Y21	Y22	Y23	Y24	Y25	Y26	Y27	Y28	Y29	Y30	Y31	Y32	Y33	Y34
-154.705	-1.25029	-0.194237	-0.0923329	-0.196569	-0.0566302	0.0201276	-0.0262296	0.00193147	0.0220331	-0.00583954	-0.00348283	-0.00857375	0.00123581	0.00767916	0.00301673	0.000988304	-0.00176436	0.000546067	-0.00316693	-0.00129048	-0.00130637	0.000928249	0.000191507	-0.00151207	0.000466986	0.00030903	0.00083471	-0.00087216	-0.000959672	-0.000279138	-0.000183854	-0.000294031	-0.000685559	X1
-25.3615	-208.848	7.07627	-0.0982182	0.379856	-0.18516	0.0189458	0.163935	0.0397833	-0.0042953	0.00786937	0.0400858	0.0309687	-0.00662627	-0.00786292	-0.00793041	0.00862072	0.00980828	0.00289596	0.00295019	0.00303768	0.00132227	-0.00504082	-0.00135596	0.000303583	-0.000654733	0.00169887	-0.00264104	0.00212642	0.00100986	0.000317153	-8.11891e-05	-0.000171754	0.000990755	X2
-1.11401	7.24805	-211.634	-1.58035	-1.95662	-0.265569	0.0494057	-0.136856	0.0184619	0.0888644	-0.0217976	-0.0136059	-0.0287927	0.00581573	0.0233388	0.00913105	0.00350752	-0.00420039	0.00198764	-0.00798082	-0.00328542	-0.00324857	0.00267031	0.000701575	-0.00355541	0.00123012	0.000984314	0.00192228	-0.00202488	-0.00219327	-0.000626852	-0.000405321	-0.000631815	-0.00160224	X3
0.0364254	-1.02415	-24.1227	-157.48	-4.69808	-0.548679	0.052843	0.0406439	0.0474161	0.0395284	-0.0017779	0.0215455	0.00830822	-0.000468443	0.00535844	-5.77748e-05	0.00663525	0.00403295	0.00239216	-0.000747308	0.000545454	-0.000350158	-0.00132825	-0.000259434	-0.000867993	0.000178848	0.00123105	-0.000616911	0.000310874	-0.000188925	-3.91353e-05	-0.000143665	-0.000245394	-0.000101651	X4
-0.0077788	-1.45181	1.80203	-0.831507	-200.461	-7.73189	0.392396	0.342258	0.248333	0.219183	-0.0190012	0.104064	0.0359281	-0.00569278	0.0219987	-0.00237411	0.0245265	0.0143071	0.00856114	-0.00442532	0.00160546	-0.00164479	-0.00521853	-0.00123036	-0.00356934	0.000536131	0.00410326	-0.00202006	0.000996854	-0.000840594	-0.00018817	-0.000539315	-0.000906933	-0.000348009	X5
0.0511395	-0.386388	1.35758	-2.20753	-12.4611	-209.301	2.6568	1.33798	0.386171	0.17375	0.00561792	0.195893	0.104538	-0.0112648	0.00195148	-0.0107163	0.032396	0.0247325	0.00922955	0.00405886	0.00556889	0.00163691	-0.00781235	-0.00151428	-0.00045737	-0.000193228	0.00436521	-0.00396692	0.00273326	0.000974303	0.000334136	-0.000208538	-0.000399699	0.00073834	X6
0.0238753	0.18091	0.0753637	0.227245	0.693634	-6.2044	-148.991	-1.72163	-0.124745	-0.263388	0.0483552	-0.0712113	0.00452998	0.00804117	-0.0322256	-0.000945557	-0.0119081	-0.00275369	-0.00486185	0.00896831	0.00142073	0.00316326	0.00210408	0.000812929	0.004132	-0.000647125	-0.00196201	-3.84801e-05	0.000464038	0.00154042	0.000409802	0.000483847	0.000779411	0.000760263	X7
-0.0380476	-0.00184071	-0.244554	0.0738864	-0.666535	-2.04603	-37.2958	-215.8	1.88849	2.60393	-0.168192	-0.126349	-0.220728	0.0440195	0.106616	0.0401114	-0.00953224	-0.0279201	0.000339178	-0.0219547	-0.0101636	-0.00786349	0.00960878	0.00212056	-0.00656953	0.00229556	-0.000678175	0.00526409	-0.00466296	-0.00396214	-0.00112266	-0.00050645	-0.000757878	-0.00264504	X8
0.00182694	0.0383298	-0.0465055	0.0663207	0.154157	0.474667	-0.667025	-4.57987	-141.978	-3.23395	0.100219	0.0586099	0.049411	0.0297763	-0.0093497	0.0157524	-0.00693977	-0.00418338	-0.00244007	0.00636846	-9.33088e-05	0.00136838	0.00474712	0.00177491	0.00238541	0.0003697	-0.00116802	0.00115302	-0.000756866	0.000376199	9.53438e-05	0.000292895	0.00046172	-0.000200342	X9
0.00605811	0.0825648	-0.0760086	0.10725	0.188443	0.565475	-0.28526	-2.68971	-0.899356	-193.041	2.51769	-1.68051	-0.139521	0.035871	-0.178499	0.0369634	-0.081807	-0.0319963	-0.021534	0.0295884	-3.11395e-05	0.00706752	0.014532	0.00459224	0.0106219	-0.000359447	-0.00666918	0.00335361	-0.00152087	0.0023995	0.000601274	0.00116422	0.0018356	0.00041082	X10
-0.00794143	-0.00994728	-0.030377	-0.0158195	-0.0909134	-0.0863913	0.133365	-0.281851	-0.678136	-3.57727	-135.975	2.02305	0.196903	0.118971	0.207101	0.0770233	0.0260246	-0.0189868	0.00681641	-0.0221661	-0.0070703	-0.00677458	0.00685495	0.00190284	-0.00667425	0.00242084	0.00183835	0.00319245	-0.0032245	-0.00319521	-0.000851951	-0.000501569	-0.00080541	-0.00208829	X11
-0.0100183	0.0135563	-0.0598851	0.0159195	-0.0528091	0.0274078	0.0466407	-0.513341	-0.473445	1.59024	-10.6193	-205.944	-7.35211	0.276537	0.287283	0.225805	-0.151282	-0.143405	-0.0167664	-0.0464274	-0.0262188	-0.0139162	0.029285	0.0063987	-0.00886543	0.00395197	-0.00415629	0.0107734	-0.00865908	-0.00576532	-0.00160793	-0.00036333	-0.000520084	-0.00385066	X12
-0.0088559	-0.0101739	-0.032437	-0.00902295	-0.0794215	-0.0750939	0.0371208	-0.0714047	0.134582	1.23946	-1.20794	-14.9103	-208.977	2.08217	1.21739	0.300294	-0.0833229	-0.151365	0.0338688	-0.100728	-0.0341944	-0.0257832	0.0276321	0.0067552	-0.0200853	0.00663549	0.00377384	0.00939158	-0.0088257	-0.00855674	-0.00225701	-0.00128323	-0.00192696	-0.00513902	X13
0.00113682	-0.0119399	0.0170994	-0.0099315	-0.000537455	-0.0191447	0.00898629	0.0933287	0.101302	0.127361	0.176741	0.0677288	-25.1988	-146.378	-1.80267	-0.0594357	0.403528	0.261382	0.0601098	0.0234193	0.0244704	0.00436336	-0.0309384	-0.00602026	-0.000758523	-0.00133729	0.00806282	-0.00871981	0.00593017	0.00187745	0.000561437	-0.00045709	-0.000723601	0.00161135	X14
0.00301288	0.0152016	0.0036904	0.0161815	0.0495596	0.0733576	-0.0113171	-0.0568451	-0.073533	-0.0992785	0.260541	-0.329333	-2.77015	-41.9643	-198.845	2.04378	-1.73571	-0.25137	-0.19183	0.222265	0.00680962	0.0374233	0.0210191	0.00155867	0.0353962	-0.00807513	-0.0217675	0.00256066	0.00214836	0.00848253	0.00201095	0.00235492	0.00361172	0.00414399	X15
0.00124168	-0.00133363	0.00734237	-0.00156096	0.00695415	0.00202805	0.000239077	0.0214661	0.00868872	-0.0026146	0.0417114	0.248506	0.579274	-0.591634	-12.3955	-148.053	2.31885	0.358922	0.0412393	0.0553008	0.042118	0.0252716	-0.0260296	-0.00336018	0.0102945	-0.00240834	0.00390931	-0.00731273	0.00553256	0.00398006	0.00107274	0.000381664	0.000514459	0.00220815	X16
-0.00237484	0.00792781	-0.0139683	0.00899447	0.0053702	0.0274728	0.00368896	-0.0613288	-0.0306889	0.0575676	-0.0065508	-0.195121	-0.439469	0.458294	1.93191	-8.45619	-205.808	-7.54141	0.0676639	-0.241796	-0.196673	-0.0672037	0.172827	0.0231431	-0.0137229	0.00398813	-0.0343592	0.0331034	-0.0209882	-0.00888878	-0.00254971	0.000499181	0.000890491	-0.00485	X17
-0.00313769	0.00127721	-0.0118357	0.00265054	-0.00741549	0.00632212	0.00767991	-0.0343462	-0.00724934	0.0716377	-0.0219638	-0.0734987	-0.220581	0.169308	1.18032	0.676694	-16.6294	-203.078	1.73724	-1.79996	-0.294036	-0.196021	0.246762	0.0342024	-0.0847487	0.0167888	-0.0191909	0.040869	-0.03024	-0.0217556	-0.00555767	-0.00203147	-0.00289637	-0.0098214	X18
0.000130202	0.0028716	-0.00184712	0.00261636	0.00412478	0.00751317	-0.00158031	-0.00989983	-0.00789271	-0.00892076	0.00429925	-0.0303689	-0.0275831	0.0226499	0.0118329	0.123577	-1.61114	-9.58696	-151.374	2.56563	0.0911266	0.0660425	0.0530846	0.0172933	0.0430928	0.00040841	-0.0181908	0.00969396	-0.00312404	0.00378682	0.000893329	0.00154195	0.00212325	0.000265615	X19
-0.00180258	-0.0074531	0.000243866	-0.0055909	-0.0122122	-0.014082	0.00770416	0.0106133	0.0172835	0.0512419	-0.00864571	0.0620213	0.034478	-0.0246465	0.236745	0.0618033	1.21461	1.82481	-6.54714	-208.969	1.2569	-0.0417443	-0.201499	0.0404122	-0.232277	0.0422168	0.094715	-0.0154527	-0.00737972	-0.0305291	-0.00686499	-0.00737446	-0.0104948	-0.00890622	X20
-0.000587834	0.000524996	-0.00262272	0.000473787	-0.00191998	0.000333335	0.000999175	-0.00548226	-0.00182609	0.00661878	-0.00430039	-0.0128395	-0.0265797	0.00842513	0.0492833	0.0647548	0.00513073	-0.282677	-0.883091	-4.28344	-149.469	-1.21194	0.49908	0.0939658	0.0134144	0.0221745	-0.0112398	0.0374094	-0.0226345	-0.0107999	-0.0022616	9.8433e-05	-0.000401817	-0.00597412	X21
-0.000584805	-0.000694672	-0.00139916	-0.000417025	-0.00250081	-0.00147693	0.00136993	-0.00151681	0.00108189	0.008588	-0.00324059	-0.00104874	-0.0106451	0.00269575	0.0342724	0.02132	0.0288556	0.00131411	0.118912	-1.0557	-9.32952	-155.483	2.75738	0.119732	-0.108059	0.0297583	0.0048087	0.0435605	-0.0278874	-0.0218635	-0.0046004	-0.00207755	-0.00300453	-0.0077915	X22
0.00133681	-0.00101739	0.00598026	-0.000903961	0.00494844	0.000591036	-0.0016919	0.0101042	0.00281744	-0.0103739	0.00946201	0.0245128	0.0482259	-0.0118189	-0.0786579	-0.0747827	-0.0143446	0.218952	0.0606561	1.36859	0.925255	-1.80598	-204.956	-4.5291	2.96559	-0.0699644	0.178486	-0.251151	0.172013	0.107177	0.0225766	0.00712613	0.0100545	0.0323922	X23
0.000216863	-0.00210442	0.00234893	-0.00168544	-0.00132279	-0.00384013	0.000445561	0.00656139	0.00431731	0.00237749	0.00128881	0.0155769	0.0180723	-0.00719378	-0.00597986	-0.022305	0.0540708	0.119832	0.113535	0.173487	0.154427	-0.950531	-2.97718	-146.324	2.08795	0.224944	0.356491	-0.194411	0.104807	0.0222005	0.00601112	-0.00443694	-0.00493174	0.00730157	X24
-0.00022824	-0.00346923	0.0016209	-0.00274386	-0.00464585	-0.00717906	0.00164237	0.00725714	0.00623284	0.00833765	-0.00133761	0.0170544	0.0124902	-0.00798079	0.0159718	-0.00824289	0.0841273	0.102563	0.105136	-0.0405561	0.159747	-0.272614	-2.76643	-3.72194	-213.729	2.56201	1.27009	-0.372464	0.00942665	-0.130205	-0.013903	-0.02401	-0.0323542	-0.0172371	X25
0.000517003	0.000299382	0.00172852	0.000175826	0.002444	0.00145868	-0.000804222	0.00165865	-0.000394528	-0.00435866	0.00273721	0.00328744	0.00920932	-0.00170218	-0.0177341	-0.0113798	-0.011538	0.0107744	-0.013611	0.091227	0.101957	0.23065	-0.226145	-0.776167	-5.71173	-150.38	-1.28106	-0.103397	0.276165	0.249545	0.0448424	0.0225807	0.0214927	0.0421614	X26
-0.000559334	0.00176408	-0.00287085	0.00157447	0.000772587	0.00382633	0.000199876	-0.0067626	-0.00337715	0.00158617	-0.0015233	-0.0117246	-0.014981	0.00517042	0.0108631	0.0156162	-0.0338645	-0.0603188	-0.0278977	-0.0821762	-0.0815255	-0.0749427	0.584926	0.482026	-2.52012	-33.1078	-204.833	11.4375	-1.78509	-0.332541	-0.0263522	0.024881	0.011879	-0.0702522	X27
0.000796535	0.000565257	0.00236404	0.000315872	0.00326555	0.00172057	-0.00129516	0.00244146	-0.000457112	-0.00641974	0.0032104	0.00353544	0.0107732	-0.00152184	-0.0212294	-0.0141161	-0.0097428	0.0174018	-0.00672706	0.0846903	0.0600491	0.118845	-0.106376	-0.00264891	1.41204	-1.14701	10.5115	-215.984	4.20285	1.27905	0.12099	0.0481033	0.107624	0.166565	X28
-0.000803868	-0.00107068	-0.00155378	-0.000562787	-0.00264468	-0.00137368	0.00143536	-0.00148254	0.000957914	0.00701818	-0.00219944	-0.000406308	-0.00612338	0.000193477	0.0156243	0.00802798	0.00718191	-0.0075624	0.0104867	-0.062231	-0.0286803	-0.0594867	0.00606191	0.00867423	-0.45866	0.485952	1.09154	-44.0577	-210.631	-9.58136	-0.653764	-0.158612	-0.223385	-0.2754	X29
-0.000515406	-0.00189378	-0.000134412	-0.00127892	-0.00288886	-0.00303003	0.00130004	0.00153946	0.00235977	0.00605437	-0.00142447	0.00432296	0.00010013	-0.00166857	0.0104287	0.00203421	0.0170911	0.0111284	0.0173469	-0.0344221	-0.00590461	-0.0333059	-0.0688457	-0.037665	-0.293311	0.176692	1.23876	-1.24443	-18.2612	-203.364	-4.29436	-0.637358	-0.296789	-0.197076	X30
-0.000302266	-0.000196065	-0.000969493	-0.000149653	-0.0014018	-0.000856146	0.000465057	-0.000787951	0.000201466	0.00213821	-0.00118052	-0.0011399	-0.00347577	0.00049761	0.00649369	0.00411872	0.00384392	-0.00341027	0.00221015	-0.0194571	-0.011857	-0.0190204	0.0128305	0.00173679	-0.11639	0.0616731	0.242167	0.440072	-2.55882	-2.06204	-150.505	-1.35899	-0.0459093	-0.246151	X31
-0.000241457	-0.000701871	-0.000286112	-0.000496849	-0.00141676	-0.00138258	0.000523563	0.000432727	0.000862339	0.00234604	-0.000792209	0.00110998	-0.000764152	-0.000353963	0.0045192	0.00144261	0.00640117	0.00300636	0.00533969	-0.0128498	-0.0046367	-0.0113927	-0.00949357	-0.00578005	-0.0706539	0.0204122	0.171462	0.1078	-0.430325	-1.74643	-8.27377	-145.04	1.63212	0.111388	X32
-8.50878e-05	-0.000333103	-0.000102966	-0.000252426	-0.000722289	-0.000787836	0.000207078	0.000351479	0.000465074	0.000926377	-0.000360844	0.000619405	-0.000184424	-0.000167628	0.00193322	0.000520942	0.00335736	0.0021017	0.00279593	-0.00427177	-0.00152072	-0.00500851	-0.00499572	-0.00233099	-0.0257102	0.00845432	0.0491236	0.00867815	0.0041572	-0.27004	-0.408852	-26.2538	-149.491	-3.05872	X33
-0.000323422	-0.000998161	-0.000392047	-0.000698952	-0.00201307	-0.00200228	0.000685013	0.000685345	0.0012175	0.00299325	-0.00102572	0.00151753	-0.000867211	-0.000447884	0.00557931	0.00167582	0.00790956	0.0041043	0.0065408	-0.0123319	-0.00431667	-0.0126155	-0.010986	-0.00593593	-0.060458	0.0196159	0.107494	0.00509959	-0.0723653	-0.473987	-0.234047	-1.01977	-0.204999	-198.994	X34
[truncated: 21 more columns]

## Sheet: HeatMaps-DNA-LS
The HFLD/LED Interaction Energy Map for the Large DNA System LS without Backbones												Electrostatic, Exchange, Solvent polarization, and Dispersion Energy Submatrices of the HFLD/LED Interaction Energy Map for the Large DNA System LS without Backbones

[truncated: 2 more sheets: BaseStepContributions, References]
